# Supplementary material for: A Study of the Genomic Variations Associated with Autistic Spectrum Disorders in a Russian Cohort of Patients Using Whole-Exome Sequencing
Source: MDPI journal article supplement (doi:10.3390/genes13050920), 2022-05-20
Supplement: s1 [file s1]

**Table S2.** Summary statistics on genotyping results, provided separately for three WES data subsets prepared with three exome capture assays.

| QC metric           | ASD<br>(TruSeq)       | ASD<br>(SureSelect V7) | nonASD<br>(SureSelect V6) | Expected values                   |
|---------------------|-----------------------|------------------------|---------------------------|-----------------------------------|
| # SNP Total         | 145653                | 128432                 | 95964                     | —                                 |
| # SNP per<br>sample | ~31762<br>(sd 1397.8) | ~23104.5<br>(sd 429.2) | ~24186.5<br>(sd 516.8)    | ~25000<br>(1000 Genomes,<br>2015) |
| nHet/<br>nNonRefHom | 1.60<br>(sd 0.06)     | 1.65<br>(sd 0.06)      | 1.59<br>(sd 0.08)         | ~1.6<br>(Wang et al., 2014)       |
| Ti/Tv               | 2.73 (sd 0.04)        | 2.94<br>(sd 0.02)      | 2.93<br>(sd 0.08)         | ~3.0<br>(Wang et al., 2014)       |
| # CNV Total         | 2525                  | 1559                   | 907                       | —                                 |
