# Supplementary material for: A Study of the Genomic Variations Associated with Autistic Spectrum Disorders in a Russian Cohort of Patients Using Whole-Exome Sequencing
Source: MDPI journal article supplement (doi:10.3390/genes13050920), 2022-05-20
Supplement: s1 [file s1]

(A)

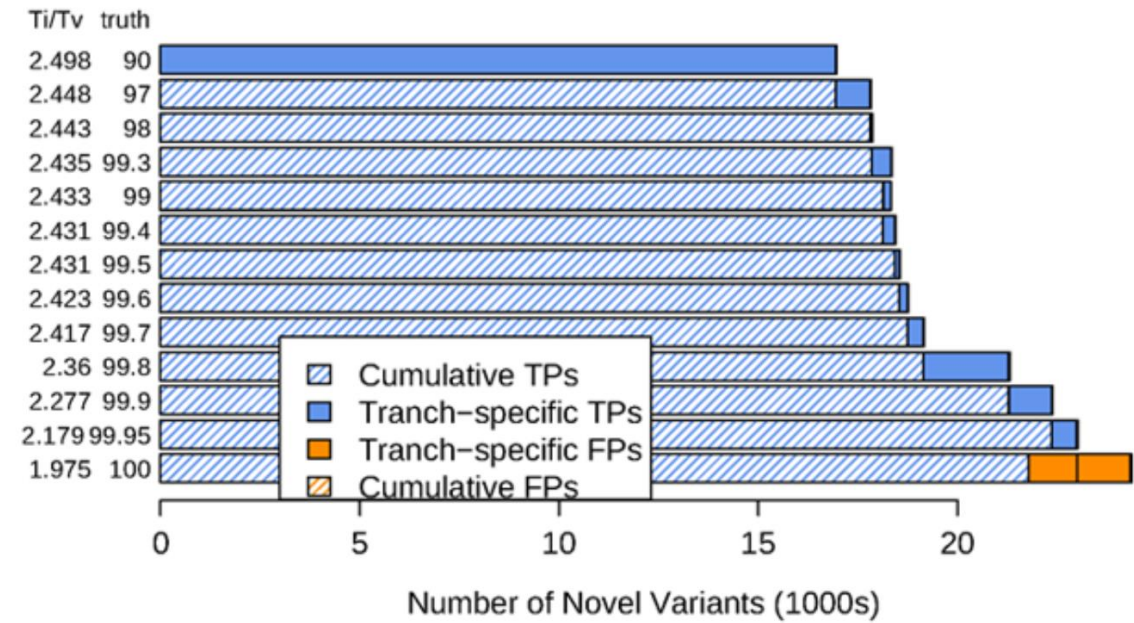

(B)

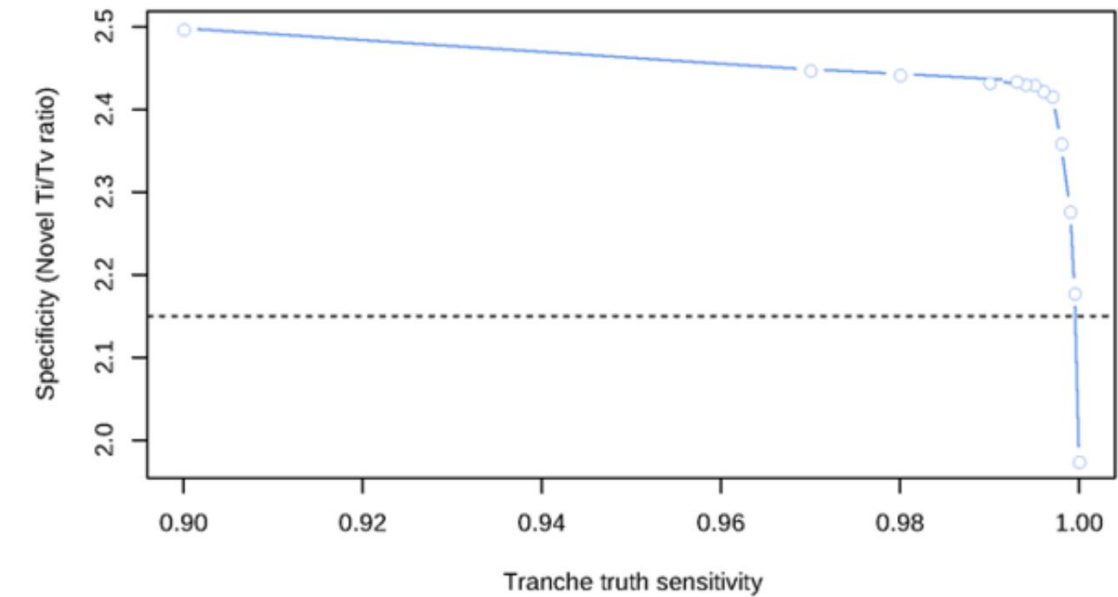

**Figure S1.** Tranches plot (SureSelect V7). (A)Tranches plot (SureSelect V7), (B)Sensitivity-specificity relation (SureSelect V7).

(A)

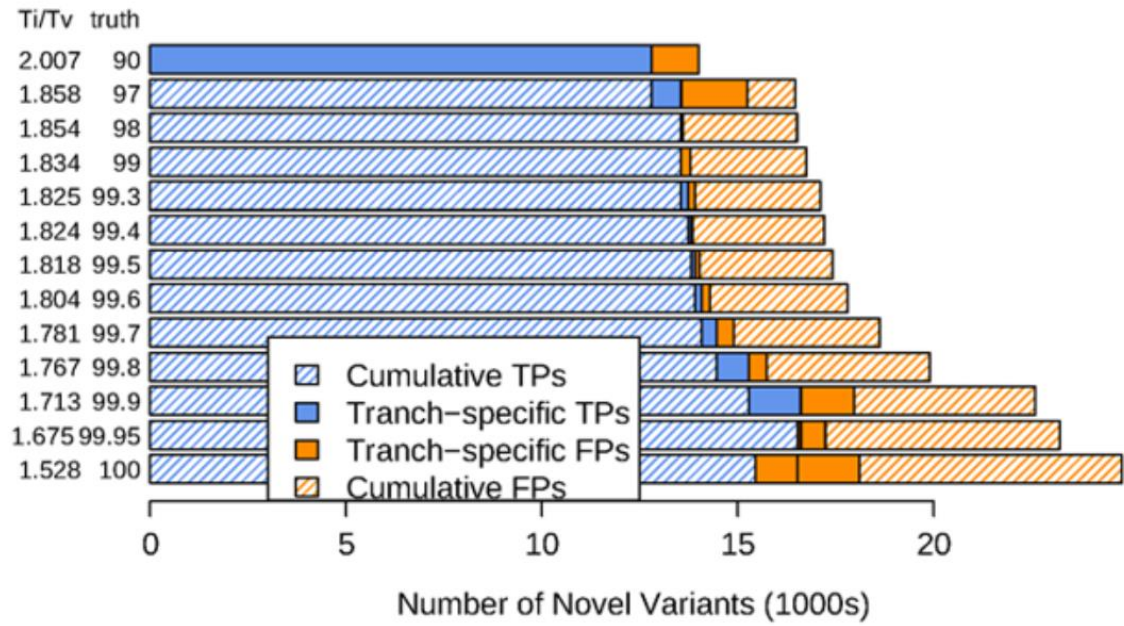

(B)

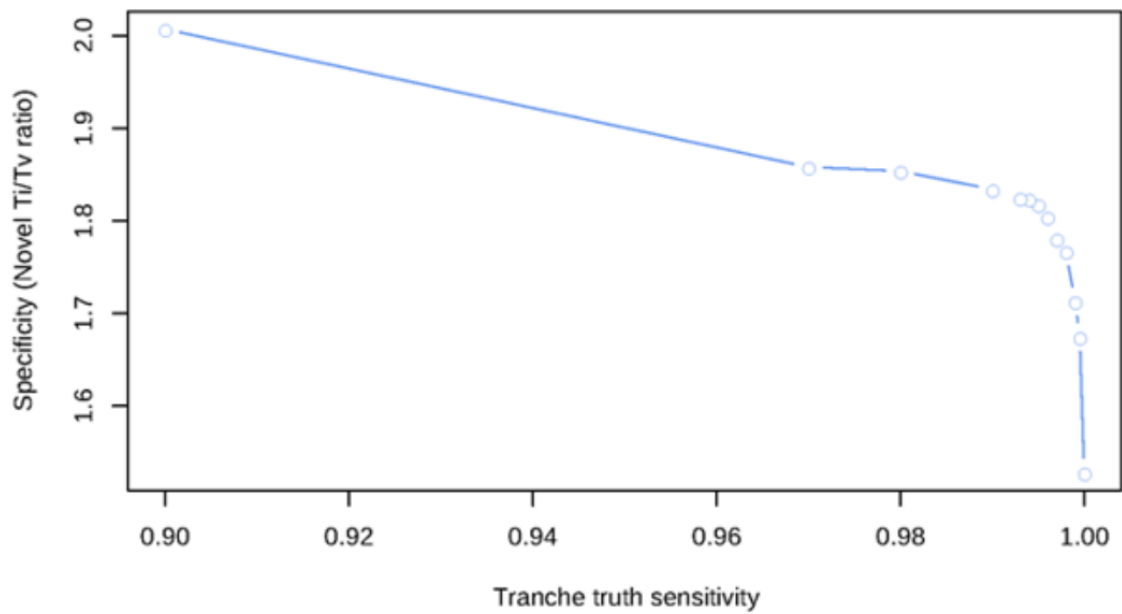

**Figure S2.** Tranches plot (TruSeqExome). (A) Tranches plot (TruSeq DNA Exome), (B) Sensitivity-specificity relation (TruSeq DNA Exome).
