# Supplementary material for: A Study of the Genomic Variations Associated with Autistic Spectrum Disorders in a Russian Cohort of Patients Using Whole-Exome Sequencing
Source: Genes (Basel). 2022 May 20;13(5):920. doi: 10.3390/genes13050920 (PMC9141003; doi:10.3390/genes13050920)
Supplement: Supplementary file 1 [file genes-13-00920-s001.zip]

Archive with 10 entries (10 files):
- Figure S1 and Figure S2.pdf
- Table S1.xlsx
- Table S2.pdf
- Table S3.xlsx
- Table S4.xlsx
- Table S5.xlsx
- Table S6.xlsx
- Table S7.xlsx
- Table S8.xlsx
- Table S9.xlsx
