# Supplementary material for: A Study of the Genomic Variations Associated with Autistic Spectrum Disorders in a Russian Cohort of Patients Using Whole-Exome Sequencing
Source: Genes (Basel). 2022 May 20;13(5):920. doi: 10.3390/genes13050920 (PMC9141003; doi:10.3390/genes13050920)
Supplement: Supplementary file 1 [file genes-13-00920-s001.zip › Table S1.xlsx]

## Sheet: Лист1
Table S1. Participants. Demographics and phenotypic data for 193 individuals with ASD and 51 nonASD controls.
ID	Group	Sex	Age, yrs	Comorbid Phenotypes	Family History
R0001	ASD	M	4.6	non-specific	non-specific
R0006	ASD	M	8.1	Epicanthus; macrotia; Phelan-McDermid syndrome (suspected)	Sibling: Cognitive delay; Speech and language delays
R0008	ASD	M	10	Fragile X syndrome (suspected; not confirmed)	Sibling: Cognitive delay; Speech and language delays
R0010	ASD	M	9.1	Funnel chest; scoliosis; area of hypopigmentation in the form of a long white stripe on the shoulder	non-specific
R0013	ASD	M	6.2	Slightly elongated palpebral fissures	Schizophrenia; Twin sibling: Kabuki syndrome
R0016	ASD	F	10.2	non-specific	Mental retardation; Alzheimer's disease; Sibling: Situs inversus
R0019	ASD	M	7.7	non-specific	Schizophrenia; Psychopathologies (unspecified)
R0023	ASD	M	6.6	An additional right thumb phalanx; moderate hypotonia and clumsy walking and movements; dyspeptic symptoms	non-specific
R0024	ASD	M	15.5	non-specific	non-specific
R0027	ASD	M	5.7	non-specific	Schizophrenia
R0029	ASD	M	5.9	non-specific	non-specific
R0031	ASD	M	6.8	non-specific	non-specific
R0035	ASD	M	8.2	“Elfin-like” facial features; Fragile X syndrome (suspected; confirmed)	Behavior disorder (unspecified)
R0038	ASD	M	12.2	non-specific	Cognitive delays; Speech and language delay
R0042	ASD	M	7.2	Intraareolar polythelia	Cognitive delays; Speech and language delays; Epilepsy
R0044	ASD	M	6.2	Joint hypermobility; skin hyperelasticity; protruding auricles; unusual hair growth on the back of the head; Ehlers-Danlos Syndrome	Sibling: Cognitive delay; Speech and language delays
R0047	ASD	M	10.5	non-specific	Hypothyroidism
R0051	ASD	M	7.9	non-specific	non-specific
R0054	ASD	F	14.4	non-specific	non-specific
R0058	ASD	M	5.1	Asperger's syndrome (suspected)	Sibling: Down syndrome
R0059	ASD	M	7	Corpus callosum dysplasia	Siblings: PDD-NOS and Cortical dysplasia; Down Syndrome
R0063	ASD	M	4.1	Lower epicanthus; deep-set eyes; depressed nose bridge; short nose; slightly twisted nostrils; long filter (?)	non-specific
R0066	ASD	M	6.6	non-specific	non-specific
R0068	ASD	M	8	Slight antimongoloid slanting palpebral fissures	non-specific
R0072	ASD	M	8	Protruding frontal bones; hypothelorism; high palate; bilateral clinodactyly	non-specific
R0075	ASD	M	5.4	Protruding frontal bones; dysplastic and low-set auricles; clinodactyly	non-specific
R0076	ASD	M	8.9	Autoaggression; facial dysmorphisms; Fragile X syndrome (confirmed)	Schizophrenia; Mental retardation
R0080	ASD	M	4.2	Epicanthus	non-specific
R0083	ASD	F	10.8	Asthenic physique; hypertrichosis; premature puberty	non-specific
R0085	ASD	M	6.8	non-specific	non-specific
R0091	ASD	M	5.9	High forehead	non-specific
R0093	ASD	M	7.3	Protruding forehead; broad face	Cognitive delay; Speech and language delays
R0095	ASD	M	9.8	Upturned nose	non-specific
R0098	ASD	M	9.2	non-specific	non-specific
R0105	ASD	M	5.2	Double helix (?); large head; dysplastic auricles	non-specific
R0108	ASD	M	10.4	non-specific	non-specific
R0115	ASD	M	6.7	non-specific	non-specific
R0116	ASD	M	6.4	Ears are slightly dysplastic; notches on both earlobes; asymmetric auricles; hygroma on the back of the neck (underwent surgery at 2 months)	Father: Arthrogryposis; Facial dysmorphia. Paternal: Short stature; Bone deformities; Facial dysmorphias
R0117	ASD	M	N/A	non-specific	Father: Arthrogryposis; Facial dysmorphia. Paternal: Short stature; Bone deformities; Facial dysmorphias
R0118	ASD	M	7.6	Angelman syndrome (suspected)	Sibling: Autistic features
R0125	ASD	M	7.1	non-specific	non-specific
R0127	ASD	M	6.5	non-specific	non-specific
R0130	ASD	M	9.9	Deep-set eyes; wide nose; hypersthenic physique; inverted nipples	non-specific
R0134	ASD	M	7.8	non-specific	non-specific
R0137	ASD	M	9	Skin prone to scarring; high palate; malocclusion; uneven teeth	Paternal: Behavior disorder (unspecified)
R0145	ASD	M	6.1	non-specific	non-specific
R0147	ASD	M	7	Hypertelorism; Hypotonia; Nasal bridge folds	Father: ASD
R0148	ASD	M	8.8	non-specific	non-specific
R0150	ASD	M	6.6	non-specific	non-specific
R0154	ASD	M	7.9	Very long eyelashes	Sibling: ASD
R0155	ASD	M	4.6	Very long eyelashes; hypotelorism; deformation of the right auricle upper edge	Sibling: ASD
R0161	ASD	M	5	Macrocephaly; macrosomia	Schizophrenia
R0164	ASD	M	3.9	non-specific	non-specific
R0166	ASD	M	5	non-specific	non-specific
R0168	ASD	M	5	non-specific	non-specific
R0171	ASD	M	5.4	non-specific	non-specific
R0175	ASD	M	18	non-specific	non-specific
R0177	ASD	M	6.4	non-specific	Father: Behavior disorder (unspecified)
R0191	ASD	M	10.4	non-specific	non-specific
R0199	ASD	F	5.9	non-specific	non-specific
R0203	ASD	M	1.2	non-specific	non-specific
R0209	ASD	F	2.9	non-specific	non-specific
R0212	ASD	M	8.9	Midfacial hypoplasia; Cerebral palsy; Strabismus; MRI: Ventricular dilatation; Hippocampal hypoplasia	non-specific
R0214	ASD	M	8	non-specific	non-specific
R0219	ASD	M	9.7	non-specific	non-specific
R0222	ASD	M	3.7	non-specific	non-specific
R0223	ASD	M	6.7	non-specific	non-specific
R0227	ASD	M	7.1	Hypoplasia of the middle third of the face; sunken nose bridge; moderate signs of connective tissue dysplasia	non-specific
R0229	ASD	M	10.5	non-specific	non-specific
R0232	ASD	M	4	non-specific	non-specific
R0235	ASD	M	7.4	Сonnective tissue dysplasia; funnel chest; «coffee» stain on the leg; dysplastic face; high forehead; protruding auricles; antimongoloid slanting palpebral fissures; macrognathia	non-specific
R0238	ASD	M	7.4	non-specific	Father: Cleft lip and palate
R0243	ASD	M	7.6	«Coffee» stains; formations in the brain	non-specific
R0246	ASD	M	5.7	Clinodactyly	non-specific
R0249	ASD	M	4.2	Walks on tiptoes; preauricular fossa of the left ear; low columella	non-specific
R0253	ASD	M	7.7	Stereotypical shaking of hands; epicanthus; wide nose bridge; area of skin hypopigmentation on the lateral surface of the left thigh; connective tissue dysplasia	non-specific
R0256	ASD	M	4.3	non-specific	non-specific
R0258	ASD	M	8	Brachycephaly; Hypertelorism	non-specific
R0262	ASD	M	15.5	Hereditary connective tissue disorder; transverse palmar fold; asthenic constitution	Maternal: Essential tremor
R0263	ASD	M	8.3	non-specific	Parternal: ASD
R0265	ASD	M	7.6	non-specific	non-specific
R0266	ASD	M	5.6	non-specific	non-specific
R0269	ASD	M	7.2	non-specific	non-specific
R0272	ASD	F	7.8	non-specific	non-specific
R0276	ASD	M	7.8	non-specific	non-specific
R0284	ASD	F	3.6	non-specific	non-specific
R0286	ASD	M	4.1	non-specific	non-specific
R0289	ASD	M	5.5	Microcephaly; wide nose; high forehead; no two lower incisors	non-specific
R0291	ASD	M	4	non-specific	non-specific
R0292	ASD	M	11.4	non-specific	non-specific
R0294	ASD	F	7.1	non-specific	non-specific
R0297	ASD	M	10.3	non-specific	non-specific
R0299	ASD	M	8.9	non-specific	non-specific
R0302	ASD	M	7	non-specific	non-specific
R0307	ASD	M	5.8	non-specific	non-specific
R0310	ASD	M	4.2	non-specific	non-specific
R0315	ASD	M	7.2	non-specific	non-specific
R0318	ASD	M	7.8	non-specific	non-specific
R0319	ASD	M	9.2	non-specific	non-specific
R0322	ASD	M	3.3	non-specific	non-specific
R0327	ASD	F	7	non-specific	non-specific
R0328	ASD	M	11.2	non-specific	non-specific
R0331	ASD	M	9.1	Wide terminal phalanges of fingers and toes	non-specific
R0334	ASD	M	6.9	non-specific	non-specific
R0337	ASD	F	12.8	non-specific	non-specific
R0340	ASD	M	3	non-specific	non-specific
R0342	ASD	M	5	non-specific	non-specific
R0344	ASD	M	4.9	non-specific	non-specific
R0348	ASD	F	3.3	non-specific	non-specific
R0351	ASD	M	12.6	Early epileptic encephalopathy (suspected)	non-specific
R0358	ASD	M	5	non-specific	non-specific
R0359	ASD	M	3.1	non-specific	non-specific
R0363	ASD	M	8.3	non-specific	non-specific
R0365	ASD	F	3	non-specific	non-specific
R0367	ASD	M	16.7	non-specific	non-specific
R0370	ASD	M	4.9	non-specific	non-specific
R0372	ASD	M	5.1	non-specific	non-specific
R0377	ASD	M	16.6	non-specific	non-specific
R0379	ASD	M	5.9	non-specific	non-specific
R0383	ASD	M	2.6	non-specific	Paternal: Cognitive delays, and Speech and language delays
R0384	ASD	M	4.2	non-specific	non-specific
R0387	ASD	M	2.4	Hemangioma on the arm; vascular mesh on the chest	non-specific
R0394	ASD	M	3.1	non-specific	non-specific
R0395	ASD	M	3.7	non-specific	non-specific
R0398	ASD	M	4.4	Fragile X syndrome (suspected; not confirmed)	non-specific
R0400	ASD	M	11.9	non-specific	non-specific
R0405	ASD	M	5.9	non-specific	non-specific
R0408	ASD	M	11.2	non-specific	non-specific
R0409	ASD	M	4.3	non-specific	non-specific
R0414	ASD	M	4.6	non-specific	non-specific
R0415	ASD	M	4.9	Epilepsy; neutropenia	non-specific
R0417	ASD	M	17.9	non-specific	non-specific
R0420	ASD	M	5	non-specific	non-specific
R0423	ASD	M	7.2	non-specific	non-specific
R0427	ASD	M	3.5	non-specific	non-specific
R0430	ASD	M	10.7	non-specific	non-specific
R0433	ASD	M	5.9	non-specific	non-specific
R0437	ASD	M	10.2	non-specific	non-specific
R0440	ASD	M	9.7	non-specific	non-specific
R0444	ASD	M	7.2	non-specific	non-specific
R0449	ASD	F	6.1	non-specific	non-specific
R0450	ASD	M	3.1	non-specific	non-specific
R0454	ASD	M	5.6	non-specific	non-specific
R0457	ASD	M	5.1	non-specific	non-specific
R0462	ASD	M	5	non-specific	non-specific
R0464	ASD	M	3.8	non-specific	non-specific
R0469	ASD	M	4.3	non-specific	non-specific
R0473	ASD	M	3.1	non-specific	non-specific
R0478	ASD	M	6	non-specific	non-specific
R0480	ASD	M	4.2	non-specific	non-specific
R0484	ASD	M	6.4	non-specific	non-specific
R0488	ASD	F	3.6	non-specific	non-specific
R0490	ASD	M	3.9	non-specific	non-specific
R0497	ASD	M	6.4	non-specific	non-specific
R0498	ASD	M	6.2	non-specific	non-specific
R0501	ASD	M	15	non-specific	non-specific
R0503	ASD	M	5.6	non-specific	non-specific
R0507	ASD	M	3.2	non-specific	non-specific
R0509	ASD	F	5.4	non-specific	non-specific
R0512	ASD	M	8.1	non-specific	non-specific
R0515	ASD	M	6.9	non-specific	non-specific
R0520	ASD	M	8.1	non-specific	ASD
R0525	ASD	M	11.2	non-specific	non-specific
R0527	ASD	M	4.3	non-specific	non-specific
R0531	ASD	M	10.1	non-specific	non-specific
R0535	ASD	M	8.3	non-specific	non-specific
R0537	ASD	F	4.9	non-specific	non-specific
R0540	ASD	F	9.2	Marfanoid habitus; severe myopia	non-specific
R0542	ASD	M	2.8	Fragile X syndrome (suspected; not confirmed)	non-specific
R0546	ASD	M	6	Ataxia; unusual hand movements; hypotonia; lack of tripod grasp	non-specific
R0551	ASD	M	3	non-specific	non-specific
R0553	ASD	F	8.5	non-specific	non-specific
R0556	ASD	M	3	non-specific	non-specific
R0558	ASD	M	2.5	non-specific	non-specific
R0560	ASD	M	6.5	non-specific	non-specific
R0563	ASD	M	9.4	non-specific	non-specific
R0567	ASD	M	1.2	non-specific	non-specific
R0571	ASD	M	7.3	non-specific	non-specific
R0576	ASD	M	3.1	non-specific	non-specific
R0578	ASD	M	2.7	non-specific	non-specific
R0581	ASD	M	2.8	non-specific	non-specific
R0584	ASD	M	3.4	non-specific	non-specific
R0587	ASD	M	12	non-specific	non-specific
R0590	ASD	M	8.8	non-specific	non-specific
R0593	ASD	M	7.6	non-specific	non-specific
R0595	ASD	M	5.6	Focal cortical dysplasia	Mother: Epilepsy with generalized seizures
R0598	ASD	M	3.6	non-specific	non-specific
R0604	ASD	M	4.4	non-specific	non-specific
R0608	ASD	M	2.3	Suspected X-linked pathology	Maternal: Psychopathy; Mental retardation
R0610	ASD	M	3.2	non-specific	non-specific
R0612	ASD	M	4	non-specific	non-specific
R0614	ASD	M	4.9	non-specific	non-specific
R0619	ASD	M	4.4	non-specific	non-specific
S01	nonASD	F	1	non-specific	non-specific
S02	nonASD	M	15	non-specific	non-specific
S03	nonASD	F	30	non-specific	non-specific
S04	nonASD	M	40	non-specific	non-specific
S05	nonASD	M	20	non-specific	non-specific
S06	nonASD	F	10	non-specific	non-specific
S07	nonASD	F	3	non-specific	non-specific
S08	nonASD	M	10	non-specific	non-specific
S09	nonASD	M	3	non-specific	non-specific
S10	nonASD	F	11	non-specific	non-specific
S11	nonASD	F	7	non-specific	non-specific
S12	nonASD	F	15	non-specific	non-specific
S13	nonASD	F	27	non-specific	non-specific
S14	nonASD	F	11	non-specific	non-specific
S15	nonASD	F	40	non-specific	non-specific
S16	nonASD	F	55	non-specific	non-specific
S17	nonASD	M	10	non-specific	non-specific
S18	nonASD	M	18	non-specific	non-specific
S19	nonASD	M	12	non-specific	non-specific
S20	nonASD	M	18	non-specific	non-specific
S21	nonASD	F	3	non-specific	non-specific
S22	nonASD	M	11	non-specific	non-specific
S23	nonASD	M	12	non-specific	non-specific
S24	nonASD	M	40	non-specific	non-specific
S25	nonASD	M	14	non-specific	non-specific
S26	nonASD	M	35	non-specific	non-specific
S27	nonASD	F	10	non-specific	non-specific
S28	nonASD	F	15	non-specific	non-specific
S29	nonASD	F	41	non-specific	non-specific
S30	nonASD	F	14	non-specific	non-specific
S31	nonASD	M	8	non-specific	non-specific
S32	nonASD	F	13	non-specific	non-specific
S33	nonASD	F	42	non-specific	non-specific
S34	nonASD	F	55	non-specific	non-specific
S35	nonASD	M	16	non-specific	non-specific
S36	nonASD	M	18	non-specific	non-specific
S37	nonASD	F	24	non-specific	non-specific
S38	nonASD	F	10	non-specific	non-specific
S41	nonASD	F	24	non-specific	non-specific
S42	nonASD	M	46	non-specific	non-specific
S43	nonASD	M	2	non-specific	non-specific
S46	nonASD	M	11	non-specific	non-specific
S49	nonASD	F	54	non-specific	non-specific
S50	nonASD	F	18	non-specific	non-specific
S51	nonASD	F	40	non-specific	non-specific
S52	nonASD	F	54	non-specific	non-specific
S53	nonASD	M	12	non-specific	non-specific
S54	nonASD	F	30	non-specific	non-specific
S55	nonASD	F	60	non-specific	non-specific
S56	nonASD	M	44	non-specific	non-specific
S57	nonASD	F	23	non-specific	non-specific
S57	nonASD	M	28	non-specific	non-specific
