# Supplementary material for: A Study of the Genomic Variations Associated with Autistic Spectrum Disorders in a Russian Cohort of Patients Using Whole-Exome Sequencing
Source: Genes (Basel). 2022 May 20;13(5):920. doi: 10.3390/genes13050920 (PMC9141003; doi:10.3390/genes13050920)
Supplement: Supplementary file 1 [file genes-13-00920-s001.zip › Table S3.xlsx]

## Sheet: Table S3 
Table S3. CNVs identified across all individuals from both comparison groups, ASD and nonASD.
Chromosome	Start position	End position	CNV width	CNV type	Group	Build
1	1634913	1669937	35025	DEL	ASD	hg19
1	3756169	3765347	9179	DEL	ASD	hg19
1	10316253	10435482	119230	DEL	ASD	hg19
1	10318499	10332415	13917	DEL	ASD	hg19
1	13476257	13522330	46074	DEL	ASD	hg19
1	13476257	13522330	46074	DEL	ASD	hg19
1	13477222	13522330	45109	DEL	ASD	hg19
1	13477222	13522330	45109	DEL	ASD	hg19
1	13477222	13522330	45109	DEL	ASD	hg19
1	13477222	13522330	45109	DEL	ASD	hg19
1	13477222	13522330	45109	DEL	ASD	hg19
1	13477222	13522330	45109	DEL	ASD	hg19
1	13477222	13522330	45109	DEL	ASD	hg19
1	13495270	13524323	29054	DEL	ASD	hg19
1	13495953	13526878	30926	DEL	ASD	hg19
1	13495953	13526878	30926	DEL	ASD	hg19
1	13495953	13526878	30926	DEL	ASD	hg19
1	16200608	16242776	42169	DEL	ASD	hg19
1	16890436	16918516	28081	DUP	ASD	hg19
1	16890436	16918516	28081	DUP	ASD	hg19
1	16890436	16918516	28081	DUP	ASD	hg19
1	16891300	16892954	1655	DEL	ASD	hg19
1	16891300	16894549	3250	DEL	ASD	hg19
1	16891300	16903914	12615	DUP	ASD	hg19
1	16892847	16918516	25670	DUP	ASD	hg19
1	16893672	16918516	24845	DEL	ASD	hg19
1	16901637	16918516	16880	DUP	ASD	hg19
1	16999485	17034222	34738	DEL	ASD	hg19
1	17017702	17046548	28847	DEL	ASD	hg19
1	17345324	17359691	14368	DEL	ASD	hg19
1	21806541	21809881	3341	DUP	ASD	hg19
1	22817841	22834681	16841	DEL	ASD	hg19
1	22817841	22834681	16841	DEL	ASD	hg19
1	22817841	22834681	16841	DEL	ASD	hg19
1	24172512	24189812	17301	DEL	ASD	hg19
1	24172512	24189812	17301	DEL	ASD	hg19
1	25570890	25655685	84796	DUP	ASD	hg19
1	25598987	25634325	35339	DUP	ASD	hg19
1	25598987	25648524	49538	DUP	ASD	hg19
1	25611012	25634325	23314	DEL	ASD	hg19
1	25611012	25634325	23314	DEL	ASD	hg19
1	25611012	25634325	23314	DEL	ASD	hg19
1	25611012	25634325	23314	DEL	ASD	hg19
1	25611012	25634325	23314	DEL	ASD	hg19
1	25611012	25634325	23314	DEL	ASD	hg19
1	25611012	25634325	23314	DEL	ASD	hg19
1	25611012	25634325	23314	DEL	ASD	hg19
1	25611012	25634325	23314	DEL	ASD	hg19
1	25611012	25634325	23314	DEL	ASD	hg19
1	25611012	25634325	23314	DEL	ASD	hg19
1	25611012	25634325	23314	DUP	ASD	hg19
1	25611012	25655685	44674	DUP	ASD	hg19
1	29313898	29342330	28433	DUP	ASD	hg19
1	29319790	29362486	42697	DEL	ASD	hg19
1	29319790	29362486	42697	DEL	ASD	hg19
1	29319790	29362486	42697	DEL	ASD	hg19
1	39311608	39322756	11149	DUP	ASD	hg19
1	39311608	39322756	11149	DUP	ASD	hg19
1	39317993	39332728	14736	DEL	ASD	hg19
1	39317993	39332728	14736	DEL	ASD	hg19
1	40661301	40756720	95420	DUP	ASD	hg19
1	40668011	40756720	88710	DUP	ASD	hg19
1	40688243	40758392	70150	DEL	ASD	hg19
1	40688243	40758392	70150	DEL	ASD	hg19
1	46511557	46531853	20297	DUP	ASD	hg19
1	46511557	46546424	34868	DEL	ASD	hg19
1	47716756	47770746	53991	DEL	ASD	hg19
1	47747965	47761571	13607	DUP	ASD	hg19
1	47747965	47770746	22782	DEL	ASD	hg19
1	53416375	53459000	42626	DUP	ASD	hg19
1	62907156	62921170	14015	DUP	ASD	hg19
1	62910406	62921170	10765	DUP	ASD	hg19
1	63027281	64038200	1010920	DUP	ASD	hg19
1	63063186	63070539	7354	DUP	ASD	hg19
1	63307046	63885162	578117	DUP	ASD	hg19
1	63329660	63919664	590005	DUP	ASD	hg19
1	63862132	63881679	19548	DUP	ASD	hg19
1	66031197	66087192	55996	DUP	ASD	hg19
1	66031197	66088705	57509	DUP	ASD	hg19
1	66031197	66088705	57509	DUP	ASD	hg19
1	66031197	66098913	67717	DUP	ASD	hg19
1	66062079	66074635	12557	DUP	ASD	hg19
1	67512896	67518725	5830	DUP	ASD	hg19
1	70881587	71318582	436996	DEL	ASD	hg19
1	76194072	76228499	34428	DUP	ASD	hg19
1	76194072	76255786	61715	DUP	ASD	hg19
1	76198277	76211650	13374	DEL	ASD	hg19
1	76198277	76215295	17019	DEL	ASD	hg19
1	76198277	76227130	28854	DEL	ASD	hg19
1	76198277	76227130	28854	DEL	ASD	hg19
1	76198277	76227130	28854	DUP	ASD	hg19
1	76276379	76363768	87390	DUP	ASD	hg19
1	78383199	78401780	18582	DUP	ASD	hg19
1	78383199	78408641	25443	DUP	ASD	hg19
1	78383199	78408641	25443	DUP	ASD	hg19
1	78390821	78401780	10960	DUP	ASD	hg19
1	78390821	78408641	17821	DUP	ASD	hg19
1	78392047	78408641	16595	DUP	ASD	hg19
1	78392349	78408641	16293	DUP	ASD	hg19
1	79358778	79392778	34001	DUP	ASD	hg19
1	86814430	86891161	76732	DUP	ASD	hg19
1	86838111	86848898	10788	DUP	ASD	hg19
1	92711054	92763607	52554	DUP	ASD	hg19
1	92712035	92763607	51573	DUP	ASD	hg19
1	92712035	92763607	51573	DUP	ASD	hg19
1	92713383	92755914	42532	DUP	ASD	hg19
1	92713383	92763137	49755	DUP	ASD	hg19
1	92713383	92763607	50225	DUP	ASD	hg19
1	92751995	92763137	11143	DUP	ASD	hg19
1	92751995	92763137	11143	DUP	ASD	hg19
1	93648914	93720225	71312	DUP	ASD	hg19
1	93649532	93736371	86840	DUP	ASD	hg19
1	94645278	94982736	337459	DUP	ASD	hg19
1	94674757	94982736	307980	DUP	ASD	hg19
1	94924110	94982736	58627	DUP	ASD	hg19
1	94924110	94982736	58627	DUP	ASD	hg19
1	94930279	94941344	11066	DUP	ASD	hg19
1	94933423	94964641	31219	DUP	ASD	hg19
1	100214116	100387258	173143	DEL	ASD	hg19
1	100214116	100459299	245184	DEL	ASD	hg19
1	100316539	100357346	40808	DUP	ASD	hg19
1	100316539	100358214	41676	DUP	ASD	hg19
1	100316539	100382338	65800	DUP	ASD	hg19
1	100316539	100382338	65800	DUP	ASD	hg19
1	100316539	100459299	142761	DEL	ASD	hg19
1	100316539	100459299	142761	DEL	ASD	hg19
1	100316539	100472757	156219	DUP	ASD	hg19
1	100326976	100459299	132324	DEL	ASD	hg19
1	100340191	100459299	119109	DEL	ASD	hg19
1	100340191	100459299	119109	DEL	ASD	hg19
1	103488246	104160724	672479	DUP	ASD	hg19
1	104083929	104163308	79380	DUP	ASD	hg19
1	104114222	104163308	49087	DUP	ASD	hg19
1	104162169	104166608	4440	DUP	ASD	hg19
1	109441449	109465249	23801	DUP	ASD	hg19
1	109441449	109465249	23801	DUP	ASD	hg19
1	109441449	109465249	23801	DUP	ASD	hg19
1	109444360	109465249	20890	DEL	ASD	hg19
1	109444360	109465249	20890	DEL	ASD	hg19
1	109445696	109465249	19554	DEL	ASD	hg19
1	110129348	110146777	17430	DUP	ASD	hg19
1	110134662	110148772	14111	DEL	ASD	hg19
1	110134662	110148772	14111	DEL	ASD	hg19
1	110148878	110155543	6666	DEL	ASD	hg19
1	110230403	110232003	1601	DUP	ASD	hg19
1	110230403	110233188	2786	DEL	ASD	hg19
1	110230403	110235974	5572	DEL	ASD	hg19
1	110230403	110235974	5572	DEL	ASD	hg19
1	110230403	110235974	5572	DEL	ASD	hg19
1	110230403	110235974	5572	DEL	ASD	hg19
1	110230403	110235974	5572	DEL	ASD	hg19
1	110230403	110235974	5572	DEL	ASD	hg19
1	110230403	110235974	5572	DEL	ASD	hg19
1	110230403	110235974	5572	DEL	ASD	hg19
1	110230403	110235974	5572	DEL	ASD	hg19
1	110230403	110235974	5572	DEL	ASD	hg19
1	110230403	110235974	5572	DEL	ASD	hg19
1	110230403	110235974	5572	DEL	ASD	hg19
1	110230403	110235974	5572	DEL	ASD	hg19
1	110230403	110235974	5572	DUP	ASD	hg19
1	110230403	110235974	5572	DEL	ASD	hg19
1	110230403	110235974	5572	DEL	ASD	hg19
1	110230403	110235974	5572	DEL	ASD	hg19
1	110230403	110235974	5572	DEL	ASD	hg19
1	110230403	110235974	5572	DEL	ASD	hg19
1	110230403	110235974	5572	DEL	ASD	hg19
1	110230403	110235974	5572	DEL	ASD	hg19
1	110919569	110931952	12384	DEL	ASD	hg19
1	115403284	115537413	134130	DUP	ASD	hg19
1	115469103	115489954	20852	DUP	ASD	hg19
1	144615129	144620094	4966	DEL	ASD	hg19
1	144615129	144620094	4966	DEL	ASD	hg19
1	144615129	144620094	4966	DEL	ASD	hg19
1	144615129	144677049	61921	DEL	ASD	hg19
1	144615129	144677049	61921	DEL	ASD	hg19
1	144615129	144677049	61921	DEL	ASD	hg19
1	144615129	144677049	61921	DEL	ASD	hg19
1	144615129	144677049	61921	DEL	ASD	hg19
1	144615129	144677049	61921	DEL	ASD	hg19
1	144615129	144677049	61921	DEL	ASD	hg19
1	144615129	144677049	61921	DEL	ASD	hg19
1	144615129	144677049	61921	DEL	ASD	hg19
1	144615129	144811957	196829	DEL	ASD	hg19
1	144615129	144816021	200893	DEL	ASD	hg19
1	144823811	144827928	4118	DUP	ASD	hg19
1	145322699	145328453	5755	DEL	ASD	hg19
1	145322699	145328453	5755	DEL	ASD	hg19
1	145322699	145328453	5755	DEL	ASD	hg19
1	145322699	145328453	5755	DEL	ASD	hg19
1	145322699	145328453	5755	DEL	ASD	hg19
1	145322699	145328453	5755	DEL	ASD	hg19
1	145322699	145328453	5755	DEL	ASD	hg19
1	145322699	145328453	5755	DEL	ASD	hg19
1	145322699	145328453	5755	DEL	ASD	hg19
1	145322699	145328453	5755	DEL	ASD	hg19
1	145322699	145330074	7376	DEL	ASD	hg19
1	145322699	145330074	7376	DEL	ASD	hg19
1	145322699	145330074	7376	DEL	ASD	hg19
1	146465876	146514567	48692	DEL	ASD	hg19
1	146491107	146496483	5377	DEL	ASD	hg19
1	150671120	150684084	12965	DUP	ASD	hg19
1	150672573	150680885	8313	DUP	ASD	hg19
1	155733101	155823622	90522	DEL	ASD	hg19
1	155784069	155791390	7322	DUP	ASD	hg19
1	155784069	155791390	7322	DUP	ASD	hg19
1	155784069	155791390	7322	DUP	ASD	hg19
1	158326515	158990321	663807	DEL	ASD	hg19
1	158587275	158597564	10290	DEL	ASD	hg19
1	158909191	158990321	81131	DEL	ASD	hg19
1	158984457	158990321	5865	DEL	ASD	hg19
1	165693526	165737557	44032	DUP	ASD	hg19
1	165693526	165737557	44032	DUP	ASD	hg19
1	169498794	169541632	42839	DEL	ASD	hg19
1	172538106	172554242	16137	DUP	ASD	hg19
1	173772098	173835185	63088	DEL	ASD	hg19
1	173797419	173819668	22250	DUP	ASD	hg19
1	174188253	174245075	56823	DEL	ASD	hg19
1	174190107	174221760	31654	DEL	ASD	hg19
1	180283775	180464711	180937	DUP	ASD	hg19
1	182869115	182920604	51490	DUP	ASD	hg19
1	185173799	185240538	66740	DUP	ASD	hg19
1	185276094	186086298	810205	DEL	ASD	hg19
1	185703860	186022257	318398	DEL	ASD	hg19
1	185815106	186089065	273960	DEL	ASD	hg19
1	185833550	186086806	253257	DEL	ASD	hg19
1	196295844	197159976	864133	DUP	ASD	hg19
1	196621186	197113281	492096	DUP	ASD	hg19
1	196682813	196709973	27161	DEL	ASD	hg19
1	196682813	197169605	486793	DEL	ASD	hg19
1	196682813	197169605	486793	DEL	ASD	hg19
1	196684671	197112991	428321	DEL	ASD	hg19
1	196709697	196871747	162051	DUP	ASD	hg19
1	196748240	196801180	52941	DUP	ASD	hg19
1	196748240	196801180	52941	DEL	ASD	hg19
1	196759123	196799863	40741	DEL	ASD	hg19
1	196759123	196801180	42058	DEL	ASD	hg19
1	196759123	196801180	42058	DEL	ASD	hg19
1	196919979	197113281	193303	DUP	ASD	hg19
1	196928008	197093512	165505	DUP	ASD	hg19
1	196928008	197113281	185274	DUP	ASD	hg19
1	196963158	196971845	8688	DEL	ASD	hg19
1	198697417	198703605	6189	DUP	ASD	hg19
1	198697417	198721551	24135	DUP	ASD	hg19
1	200813903	200827189	13287	DUP	ASD	hg19
1	205693031	205739632	46602	DUP	ASD	hg19
1	207930833	207963700	32868	DUP	ASD	hg19
1	207930833	207963700	32868	DUP	ASD	hg19
1	207932932	207959078	26147	DUP	ASD	hg19
1	207940900	207959078	18179	DUP	ASD	hg19
1	207940900	207963700	22801	DUP	ASD	hg19
1	207943614	207963700	20087	DUP	ASD	hg19
1	207943614	207963700	20087	DUP	ASD	hg19
1	210194332	210412955	218624	DEL	ASD	hg19
1	212985567	213068446	82880	DUP	ASD	hg19
1	213056661	213068446	11786	DUP	ASD	hg19
1	216496764	216592072	95309	DEL	ASD	hg19
1	216496764	216592072	95309	DUP	ASD	hg19
1	216496764	216592072	95309	DUP	ASD	hg19
1	220327258	220338192	10935	DUP	ASD	hg19
1	220327258	220406256	78999	DUP	ASD	hg19
1	220356054	220363539	7486	DUP	ASD	hg19
1	220364358	220369791	5434	DEL	ASD	hg19
1	220368588	220406256	37669	DEL	ASD	hg19
1	223156370	223168375	12006	DUP	ASD	hg19
1	225142658	225555734	413077	DUP	ASD	hg19
1	225190443	225273491	83049	DUP	ASD	hg19
1	226438476	226483649	45174	DUP	ASD	hg19
1	227307502	227441860	134359	DUP	ASD	hg19
1	231396201	231509896	113696	DEL	ASD	hg19
1	235359273	235403850	44578	DUP	ASD	hg19
1	235505323	235612128	106806	DEL	ASD	hg19
1	235564766	235622096	57331	DEL	ASD	hg19
1	235577696	235976412	398717	DEL	ASD	hg19
1	235875305	235940659	65355	DUP	ASD	hg19
1	235875305	235976412	101108	DUP	ASD	hg19
1	235875305	235976412	101108	DUP	ASD	hg19
1	235883909	235976412	92504	DEL	ASD	hg19
1	235887276	235976412	89137	DEL	ASD	hg19
1	235915253	235976412	61160	DEL	ASD	hg19
1	247061467	247065979	4513	DEL	ASD	hg19
1	248112157	248367310	255154	DEL	ASD	hg19
1	248112157	248403168	291012	DEL	ASD	hg19
1	248737088	248814187	77100	DEL	ASD	hg19
2	15628966	15676726	47761	DEL	ASD	hg19
2	15691565	15698809	7245	DUP	ASD	hg19
2	17864902	17884601	19700	DUP	ASD	hg19
2	20130978	20136167	5190	DUP	ASD	hg19
2	20130978	20169417	38440	DUP	ASD	hg19
2	24087677	24103667	15991	DUP	ASD	hg19
2	26435353	26462062	26710	DUP	ASD	hg19
2	26505661	26512872	7212	DUP	ASD	hg19
2	32312509	32372378	59870	DUP	ASD	hg19
2	32314539	32362308	47770	DEL	ASD	hg19
2	32340719	32361758	21040	DUP	ASD	hg19
2	39216359	39284058	67700	DUP	ASD	hg19
2	39224011	39284058	60048	DUP	ASD	hg19
2	39224011	39285996	61986	DUP	ASD	hg19
2	39234120	39250417	16298	DEL	ASD	hg19
2	39234120	39278479	44360	DEL	ASD	hg19
2	39234120	39278479	44360	DEL	ASD	hg19
2	44573404	44617462	44059	DUP	ASD	hg19
2	47602321	47698252	95932	DUP	ASD	hg19
2	47602321	47698252	95932	DUP	ASD	hg19
2	49209999	49247350	37352	DEL	ASD	hg19
2	58386481	58390260	3780	DUP	ASD	hg19
2	58386481	58390260	3780	DUP	ASD	hg19
2	69581569	69601296	19728	DEL	ASD	hg19
2	71575881	71592838	16958	DEL	ASD	hg19
2	73635698	73826699	191002	DEL	ASD	hg19
2	73646199	73762127	115929	DEL	ASD	hg19
2	73659274	73826699	167426	DEL	ASD	hg19
2	84744949	84785061	40113	DEL	ASD	hg19
2	88878984	88890621	11638	DEL	ASD	hg19
2	89975677	89998898	23222	DEL	ASD	hg19
2	90192924	90211813	18890	DEL	ASD	hg19
2	97845438	97877346	31909	DUP	ASD	hg19
2	97847298	97877346	30049	DUP	ASD	hg19
2	98127529	98162359	34831	DUP	ASD	hg19
2	98127529	98162359	34831	DUP	ASD	hg19
2	98152691	98162359	9669	DUP	ASD	hg19
2	98152691	98166112	13422	DUP	ASD	hg19
2	98163927	98197031	33105	DUP	ASD	hg19
2	107039497	107049741	10245	DUP	ASD	hg19
2	107039497	107053067	13571	DUP	ASD	hg19
2	109292998	109408260	115263	DUP	ASD	hg19
2	109347143	109384895	37753	DUP	ASD	hg19
2	109347143	109392443	45301	DUP	ASD	hg19
2	109347143	109392443	45301	DUP	ASD	hg19
2	109347143	109392443	45301	DUP	ASD	hg19
2	109347143	109392443	45301	DUP	ASD	hg19
2	109347143	109400408	53266	DEL	ASD	hg19
2	109347143	109400408	53266	DEL	ASD	hg19
2	109347143	109400408	53266	DEL	ASD	hg19
2	110883145	110927626	44482	DEL	ASD	hg19
2	110883145	110927626	44482	DEL	ASD	hg19
2	110883145	110936175	53031	DEL	ASD	hg19
2	130858167	130869726	11560	DUP	ASD	hg19
2	130858167	130872901	14735	DUP	ASD	hg19
2	131981167	131988547	7381	DEL	ASD	hg19
2	131981167	131988547	7381	DEL	ASD	hg19
2	135872734	135892940	20207	DEL	ASD	hg19
2	135884101	135892940	8840	DEL	ASD	hg19
2	143676126	143787289	111164	DUP	ASD	hg19
2	148695663	148733578	37916	DUP	ASD	hg19
2	165970274	166915249	944976	DEL	ASD	hg19
2	170338709	170356181	17473	DUP	ASD	hg19
2	170338709	170356181	17473	DUP	ASD	hg19
2	170338709	170356181	17473	DUP	ASD	hg19
2	170343527	170356181	12655	DUP	ASD	hg19
2	172666064	172701069	35006	DEL	ASD	hg19
2	172666682	172749819	83138	DEL	ASD	hg19
2	173339605	173366658	27054	DEL	ASD	hg19
2	173340273	173353007	12735	DUP	ASD	hg19
2	173340273	173354437	14165	DEL	ASD	hg19
2	173340273	173366658	26386	DEL	ASD	hg19
2	178284945	178378687	93743	DUP	ASD	hg19
2	178301440	178370354	68915	DUP	ASD	hg19
2	179300820	179312364	11545	DEL	ASD	hg19
2	179300820	179312364	11545	DEL	ASD	hg19
2	179300820	179334514	33695	DEL	ASD	hg19
2	202588001	202614563	26563	DEL	ASD	hg19
2	202588966	202614563	25598	DEL	ASD	hg19
2	207631366	207651674	20309	DEL	ASD	hg19
2	215797306	215919439	122134	DEL	ASD	hg19
2	215807597	215838817	31221	DEL	ASD	hg19
2	215813712	215843241	29530	DEL	ASD	hg19
2	219724690	219849821	125132	DUP	ASD	hg19
2	241621646	241709153	87508	DUP	ASD	hg19
3	2928672	3030207	101536	DEL	ASD	hg19
3	3189131	3209528	20398	DEL	ASD	hg19
3	3195056	3217004	21949	DUP	ASD	hg19
3	3195056	3217004	21949	DUP	ASD	hg19
3	10070290	10081092	10803	DUP	ASD	hg19
3	10070290	10089786	19497	DUP	ASD	hg19
3	10070290	10128989	58700	DEL	ASD	hg19
3	10070290	10128989	58700	DEL	ASD	hg19
3	10070290	10142997	72708	DEL	ASD	hg19
3	10130081	10142997	12917	DEL	ASD	hg19
3	12533583	12558211	24629	DUP	ASD	hg19
3	12533583	12558211	24629	DUP	ASD	hg19
3	12533583	12558211	24629	DUP	ASD	hg19
3	12533583	12573209	39627	DUP	ASD	hg19
3	15457276	15471517	14242	DEL	ASD	hg19
3	16630115	16639736	9622	DUP	ASD	hg19
3	16630115	16639736	9622	DUP	ASD	hg19
3	16633505	16639736	6232	DEL	ASD	hg19
3	28379425	28476762	97338	DEL	ASD	hg19
3	37042394	37056086	13693	DUP	ASD	hg19
3	37042394	37059141	16748	DEL	ASD	hg19
3	37042394	37059141	16748	DEL	ASD	hg19
3	37042394	37059141	16748	DUP	ASD	hg19
3	38257504	38271952	14449	DUP	ASD	hg19
3	43607093	43647395	40303	DUP	ASD	hg19
3	43607093	43647395	40303	DUP	ASD	hg19
3	57456168	57487195	31028	DUP	ASD	hg19
3	57456168	57493567	37400	DUP	ASD	hg19
3	57456168	57509620	53453	DUP	ASD	hg19
3	87289797	87303023	13227	DEL	ASD	hg19
3	93593037	93769787	176751	DEL	ASD	hg19
3	93714666	93754331	39666	DUP	ASD	hg19
3	93714666	93754331	39666	DUP	ASD	hg19
3	97486900	97507014	20115	DUP	ASD	hg19
3	97498951	97510721	11771	DUP	ASD	hg19
3	97498951	97516950	18000	DUP	ASD	hg19
3	97499402	97516950	17549	DUP	ASD	hg19
3	97499402	97516950	17549	DUP	ASD	hg19
3	97499402	97516950	17549	DUP	ASD	hg19
3	97851539	98217477	365939	DEL	ASD	hg19
3	100364786	100413847	49062	DUP	ASD	hg19
3	108271038	108366961	95924	DUP	ASD	hg19
3	111886015	111936410	50396	DUP	ASD	hg19
3	120833769	120973961	140193	DUP	ASD	hg19
3	121507079	121547858	40780	DEL	ASD	hg19
3	121507079	121547858	40780	DEL	ASD	hg19
3	121507079	121547858	40780	DEL	ASD	hg19
3	121514252	121605262	91011	DUP	ASD	hg19
3	121515913	121547858	31946	DUP	ASD	hg19
3	121515913	121573711	57799	DUP	ASD	hg19
3	125286235	125301838	15604	DEL	ASD	hg19
3	129150292	129182520	32229	DEL	ASD	hg19
3	129150292	129182520	32229	DEL	ASD	hg19
3	129150292	129182520	32229	DEL	ASD	hg19
3	130095078	130114311	19234	DEL	ASD	hg19
3	130098259	130114311	16053	DEL	ASD	hg19
3	130424402	130720194	295793	DEL	ASD	hg19
3	130449109	130716648	267540	DUP	ASD	hg19
3	130649112	130711896	62785	DUP	ASD	hg19
3	130649112	130711896	62785	DUP	ASD	hg19
3	130714835	130720194	5360	DEL	ASD	hg19
3	132400702	132413860	13159	DEL	ASD	hg19
3	134264939	134277240	12302	DUP	ASD	hg19
3	142168219	142282002	113784	DEL	ASD	hg19
3	145788777	145839086	50310	DEL	ASD	hg19
3	145788777	145839086	50310	DEL	ASD	hg19
3	145788777	145842067	53291	DUP	ASD	hg19
3	145789012	145839086	50075	DUP	ASD	hg19
3	154834216	154858132	23917	DUP	ASD	hg19
3	159976261	160141440	165180	DUP	ASD	hg19
3	159976261	160166653	190393	DUP	ASD	hg19
3	164697098	164792503	95406	DUP	ASD	hg19
3	164697098	164793851	96754	DUP	ASD	hg19
3	164699979	164761014	61036	DEL	ASD	hg19
3	164699979	164777866	77888	DEL	ASD	hg19
3	164699979	164777866	77888	DEL	ASD	hg19
3	164699979	165504150	804172	DEL	ASD	hg19
3	164699979	165504150	804172	DUP	ASD	hg19
3	164704874	164792503	87630	DUP	ASD	hg19
3	167402044	167508441	106398	DEL	ASD	hg19
3	172474750	172480338	5589	DUP	ASD	hg19
3	172607308	172737416	130109	DEL	ASD	hg19
3	172607308	172766935	159628	DEL	ASD	hg19
3	180325433	180372741	47309	DUP	ASD	hg19
3	183560034	183585899	25866	DEL	ASD	hg19
3	184612489	184638000	25512	DUP	ASD	hg19
3	191087656	191107442	19787	DEL	ASD	hg19
3	193201673	193382836	181164	DUP	ASD	hg19
3	193201673	193384229	182557	DEL	ASD	hg19
3	193333411	193366711	33301	DUP	ASD	hg19
3	193364802	193377401	12600	DEL	ASD	hg19
3	194162037	194171007	8971	DEL	ASD	hg19
3	195390470	195415592	25123	DEL	ASD	hg19
3	196198638	196215605	16968	DEL	ASD	hg19
4	980821	1019137	38317	DUP	ASD	hg19
4	1795610	1809450	13841	DUP	ASD	hg19
4	1803042	1809450	6409	DUP	ASD	hg19
4	1807030	1809450	2421	DUP	ASD	hg19
4	1807030	1809450	2421	DUP	ASD	hg19
4	1807030	1809450	2421	DUP	ASD	hg19
4	2230823	2242675	11853	DUP	ASD	hg19
4	2743981	2835612	91632	DUP	ASD	hg19
4	3418637	3514782	96146	DUP	ASD	hg19
4	6279131	6325322	46192	DUP	ASD	hg19
4	8477496	9237728	760233	DUP	ASD	hg19
4	9174856	9213980	39125	DUP	ASD	hg19
4	9174856	9213980	39125	DUP	ASD	hg19
4	9174856	9213980	39125	DUP	ASD	hg19
4	9174856	9213980	39125	DUP	ASD	hg19
4	9174856	9213980	39125	DUP	ASD	hg19
4	9174856	9237728	62873	DUP	ASD	hg19
4	9174856	9237728	62873	DUP	ASD	hg19
4	9174856	9237728	62873	DUP	ASD	hg19
4	9174856	9251953	77098	DUP	ASD	hg19
4	9176918	9237728	60811	DEL	ASD	hg19
4	9176918	9237728	60811	DEL	ASD	hg19
4	9176918	9237728	60811	DEL	ASD	hg19
4	9176918	9237728	60811	DEL	ASD	hg19
4	9176918	9237728	60811	DEL	ASD	hg19
4	9176918	9237728	60811	DEL	ASD	hg19
4	9176918	9237728	60811	DEL	ASD	hg19
4	9176918	9237728	60811	DEL	ASD	hg19
4	9176918	9237728	60811	DEL	ASD	hg19
4	9176918	9237728	60811	DEL	ASD	hg19
4	9176918	9237728	60811	DEL	ASD	hg19
4	48597911	48611094	13184	DUP	ASD	hg19
4	56319792	56422878	103087	DUP	ASD	hg19
4	69362358	69426432	64075	DUP	ASD	hg19
4	69403340	69434206	30867	DEL	ASD	hg19
4	69403340	69434206	30867	DEL	ASD	hg19
4	69403340	69434206	30867	DEL	ASD	hg19
4	69403340	69434206	30867	DEL	ASD	hg19
4	69403340	69434206	30867	DEL	ASD	hg19
4	69403340	69434206	30867	DEL	ASD	hg19
4	69403340	69434206	30867	DUP	ASD	hg19
4	69403340	69434206	30867	DEL	ASD	hg19
4	69403340	69434206	30867	DEL	ASD	hg19
4	69403340	69434206	30867	DEL	ASD	hg19
4	69403340	69434206	30867	DEL	ASD	hg19
4	69403340	69434206	30867	DEL	ASD	hg19
4	69403340	69434206	30867	DEL	ASD	hg19
4	69403340	69434206	30867	DEL	ASD	hg19
4	69403340	69434206	30867	DEL	ASD	hg19
4	70146216	70160529	14314	DEL	ASD	hg19
4	70146216	70160529	14314	DEL	ASD	hg19
4	70146216	70160529	14314	DEL	ASD	hg19
4	95147218	95212443	65226	DUP	ASD	hg19
4	95201691	95212443	10753	DUP	ASD	hg19
4	104037731	104082410	44680	DUP	ASD	hg19
4	104041302	104057518	16217	DUP	ASD	hg19
4	122746963	122776026	29064	DUP	ASD	hg19
4	141321498	141334266	12769	DUP	ASD	hg19
4	178274449	178360893	86445	DEL	ASD	hg19
4	178351927	178358724	6798	DEL	ASD	hg19
4	178351927	178360893	8967	DEL	ASD	hg19
5	716901	751372	34472	DUP	ASD	hg19
5	37000864	37008876	8013	DUP	ASD	hg19
5	37000864	37048828	47965	DUP	ASD	hg19
5	37016088	37044640	28553	DEL	ASD	hg19
5	37299498	37314481	14984	DEL	ASD	hg19
5	37299498	37324260	24763	DEL	ASD	hg19
5	38482639	38821538	338900	DUP	ASD	hg19
5	39288773	39316182	27410	DEL	ASD	hg19
5	52322526	52385943	63418	DEL	ASD	hg19
5	52322526	52404473	81948	DEL	ASD	hg19
5	52322526	52404473	81948	DEL	ASD	hg19
5	52362896	52385943	23048	DEL	ASD	hg19
5	56176858	56184235	7378	DEL	ASD	hg19
5	60183215	60394910	211696	DUP	ASD	hg19
5	70930718	70939773	9056	DEL	ASD	hg19
5	70930718	70939773	9056	DEL	ASD	hg19
5	70930718	70939773	9056	DEL	ASD	hg19
5	76330191	76351472	21282	DUP	ASD	hg19
5	77311182	77437194	126013	DEL	ASD	hg19
5	77405979	77563470	157492	DUP	ASD	hg19
5	79960910	80171722	210813	DEL	ASD	hg19
5	79960910	80171722	210813	DEL	ASD	hg19
5	79970750	80071628	100879	DUP	ASD	hg19
5	86628272	86682771	54500	DUP	ASD	hg19
5	94800259	94882905	82647	DEL	ASD	hg19
5	94838532	94856573	18042	DUP	ASD	hg19
5	96126163	96130916	4754	DEL	ASD	hg19
5	110430566	110459938	29373	DUP	ASD	hg19
5	110440344	110446053	5710	DEL	ASD	hg19
5	110440344	110459673	19330	DEL	ASD	hg19
5	110440344	110459673	19330	DEL	ASD	hg19
5	110440344	110459673	19330	DEL	ASD	hg19
5	131894924	131954037	59114	DUP	ASD	hg19
5	131930509	131940742	10234	DEL	ASD	hg19
5	131930509	131940742	10234	DEL	ASD	hg19
5	131930509	131940742	10234	DEL	ASD	hg19
5	133695576	133724155	28580	DUP	ASD	hg19
5	137211466	137235428	23963	DEL	ASD	hg19
5	137211466	137235428	23963	DEL	ASD	hg19
5	137221685	137257492	35808	DUP	ASD	hg19
5	138651334	138667366	16033	DUP	ASD	hg19
5	138657535	138667366	9832	DEL	ASD	hg19
5	140515014	140569285	54272	DEL	ASD	hg19
5	140515014	140569285	54272	DEL	ASD	hg19
5	140515014	140569285	54272	DEL	ASD	hg19
5	140515014	140569285	54272	DEL	ASD	hg19
5	140515014	140569285	54272	DEL	ASD	hg19
5	140515014	140569285	54272	DEL	ASD	hg19
5	140515014	140569285	54272	DEL	ASD	hg19
5	140557613	140581743	24131	DEL	ASD	hg19
5	142661402	142680379	18978	DEL	ASD	hg19
5	142661402	142680379	18978	DEL	ASD	hg19
5	180376202	180429829	53628	DEL	ASD	hg19
5	180376202	180429829	53628	DEL	ASD	hg19
5	180376202	180429829	53628	DEL	ASD	hg19
5	180376202	180429829	53628	DEL	ASD	hg19
5	180376202	180429829	53628	DEL	ASD	hg19
5	180376202	180429829	53628	DEL	ASD	hg19
6	29855518	29911322	55805	DUP	ASD	hg19
6	29855518	29911322	55805	DUP	ASD	hg19
6	29855518	29913084	57567	DUP	ASD	hg19
6	29855731	29911322	55592	DEL	ASD	hg19
6	29855731	29911322	55592	DEL	ASD	hg19
6	29855731	29911322	55592	DEL	ASD	hg19
6	29855731	29911322	55592	DEL	ASD	hg19
6	29855731	29911322	55592	DEL	ASD	hg19
6	29855731	29911322	55592	DEL	ASD	hg19
6	29855731	29911322	55592	DEL	ASD	hg19
6	29855731	29911322	55592	DEL	ASD	hg19
6	29855731	29911322	55592	DEL	ASD	hg19
6	29855731	29911322	55592	DEL	ASD	hg19
6	29855731	29911322	55592	DEL	ASD	hg19
6	29855731	29911322	55592	DEL	ASD	hg19
6	29855731	29911322	55592	DEL	ASD	hg19
6	29855731	29911322	55592	DEL	ASD	hg19
6	29855731	29911322	55592	DEL	ASD	hg19
6	29855731	29911322	55592	DEL	ASD	hg19
6	29855731	29911322	55592	DEL	ASD	hg19
6	29855731	29911322	55592	DEL	ASD	hg19
6	29855731	29911322	55592	DEL	ASD	hg19
6	29855731	29911322	55592	DEL	ASD	hg19
6	29855731	29911322	55592	DEL	ASD	hg19
6	29855731	29911322	55592	DEL	ASD	hg19
6	29856243	29913084	56842	DUP	ASD	hg19
6	31238847	31323420	84574	DEL	ASD	hg19
6	31238847	31324986	86140	DEL	ASD	hg19
6	31238847	31324986	86140	DEL	ASD	hg19
6	31238847	31324986	86140	DEL	ASD	hg19
6	31238847	31324986	86140	DEL	ASD	hg19
6	31238847	31324986	86140	DEL	ASD	hg19
6	31238847	31324986	86140	DEL	ASD	hg19
6	31238847	31324986	86140	DEL	ASD	hg19
6	31238847	31324986	86140	DEL	ASD	hg19
6	31238847	31324986	86140	DEL	ASD	hg19
6	31238847	31324986	86140	DEL	ASD	hg19
6	31238847	31324986	86140	DEL	ASD	hg19
6	31238847	31324986	86140	DEL	ASD	hg19
6	31238847	31324986	86140	DEL	ASD	hg19
6	31238847	31324986	86140	DEL	ASD	hg19
6	31238847	31324986	86140	DEL	ASD	hg19
6	31238847	31324986	86140	DEL	ASD	hg19
6	31238847	31324986	86140	DEL	ASD	hg19
6	31238847	31324986	86140	DEL	ASD	hg19
6	31239373	31324986	85614	DUP	ASD	hg19
6	31239373	31371548	132176	DUP	ASD	hg19
6	31239373	31371548	132176	DUP	ASD	hg19
6	31322832	31371548	48717	DUP	ASD	hg19
6	32485792	32498003	12212	DEL	ASD	hg19
6	32485792	32498003	12212	DEL	ASD	hg19
6	32485792	32498003	12212	DEL	ASD	hg19
6	32486269	32549615	63347	DEL	ASD	hg19
6	32486269	32549615	63347	DEL	ASD	hg19
6	32486269	32549615	63347	DEL	ASD	hg19
6	32486269	32634433	148165	DEL	ASD	hg19
6	32486269	32634433	148165	DEL	ASD	hg19
6	32486269	32634433	148165	DEL	ASD	hg19
6	32486269	32634433	148165	DEL	ASD	hg19
6	32486269	32634433	148165	DEL	ASD	hg19
6	32486269	32634433	148165	DEL	ASD	hg19
6	32486269	32634433	148165	DEL	ASD	hg19
6	32487134	32552157	65024	DUP	ASD	hg19
6	32487134	32552157	65024	DUP	ASD	hg19
6	32487134	32552157	65024	DUP	ASD	hg19
6	32487134	32552157	65024	DUP	ASD	hg19
6	32487134	32552157	65024	DUP	ASD	hg19
6	32487134	32557519	70386	DUP	ASD	hg19
6	32487134	32557519	70386	DUP	ASD	hg19
6	32487134	32557519	70386	DUP	ASD	hg19
6	32487134	32557519	70386	DUP	ASD	hg19
6	32487134	32605368	118235	DUP	ASD	hg19
6	32487134	32605368	118235	DUP	ASD	hg19
6	32549332	32634433	85102	DEL	ASD	hg19
6	32549332	32634433	85102	DEL	ASD	hg19
6	32549332	32634433	85102	DEL	ASD	hg19
6	32549332	32634433	85102	DEL	ASD	hg19
6	32549332	32634433	85102	DEL	ASD	hg19
6	32549332	32634433	85102	DEL	ASD	hg19
6	32549332	32634433	85102	DEL	ASD	hg19
6	32549332	32634433	85102	DEL	ASD	hg19
6	32549332	32634433	85102	DEL	ASD	hg19
6	32549332	32634433	85102	DEL	ASD	hg19
6	32549332	32634433	85102	DEL	ASD	hg19
6	32549332	32634433	85102	DEL	ASD	hg19
6	32549332	32634433	85102	DEL	ASD	hg19
6	32549332	32634433	85102	DEL	ASD	hg19
6	32605184	32610592	5409	DUP	ASD	hg19
6	32605184	32610906	5723	DUP	ASD	hg19
6	32605184	32634433	29250	DEL	ASD	hg19
6	32605184	32634433	29250	DUP	ASD	hg19
6	38810436	38819505	9070	DEL	ASD	hg19
6	38810436	38819505	9070	DEL	ASD	hg19
6	38820959	38831846	10888	DUP	ASD	hg19
6	43571577	43582345	10769	DEL	ASD	hg19
6	43738392	43746706	8315	DUP	ASD	hg19
6	44227777	44272986	45210	DUP	ASD	hg19
6	46672245	46678446	6202	DUP	ASD	hg19
6	46672245	46678446	6202	DUP	ASD	hg19
6	46672838	46684316	11479	DEL	ASD	hg19
6	46672838	46684316	11479	DEL	ASD	hg19
6	47512290	47549852	37563	DUP	ASD	hg19
6	56489212	56504622	15411	DEL	ASD	hg19
6	56489212	56504622	15411	DEL	ASD	hg19
6	56489212	56507637	18426	DEL	ASD	hg19
6	56497600	56504622	7023	DEL	ASD	hg19
6	70385998	70500415	114418	DUP	ASD	hg19
6	70447782	70490497	42716	DUP	ASD	hg19
6	76425098	76633437	208340	DUP	ASD	hg19
6	88216048	88279359	63312	DUP	ASD	hg19
6	88221065	88228033	6969	DEL	ASD	hg19
6	108197716	108246187	48472	DUP	ASD	hg19
6	108197716	108385554	187839	DUP	ASD	hg19
6	108197716	108385554	187839	DUP	ASD	hg19
6	110056301	110098314	42014	DEL	ASD	hg19
6	110059476	110083461	23986	DEL	ASD	hg19
6	110059476	110083461	23986	DEL	ASD	hg19
6	117010430	117037539	27110	DUP	ASD	hg19
6	117121744	117246005	124262	DEL	ASD	hg19
6	117215098	117246005	30908	DEL	ASD	hg19
6	121544379	121576565	32187	DUP	ASD	hg19
6	121563344	121615863	52520	DUP	ASD	hg19
6	129712584	129800009	87426	DEL	ASD	hg19
6	131926328	131939710	13383	DEL	ASD	hg19
6	131926328	131944653	18326	DEL	ASD	hg19
6	131926328	131944653	18326	DEL	ASD	hg19
6	132173263	132195528	22266	DUP	ASD	hg19
6	132200968	132211702	10735	DEL	ASD	hg19
6	143789207	143810414	21208	DUP	ASD	hg19
6	143792046	143796044	3999	DUP	ASD	hg19
7	6000308	6013224	12917	DEL	ASD	hg19
7	6836135	6844688	8554	DEL	ASD	hg19
7	6836135	6844688	8554	DEL	ASD	hg19
7	16128778	16317852	189075	DUP	ASD	hg19
7	22999823	23023715	23893	DUP	ASD	hg19
7	22999823	23164869	165047	DUP	ASD	hg19
7	23157451	23191879	34429	DEL	ASD	hg19
7	30639511	30649397	9887	DEL	ASD	hg19
7	30639511	30662129	22619	DEL	ASD	hg19
7	30642598	30668336	25739	DEL	ASD	hg19
7	33053740	33423501	369762	DUP	ASD	hg19
7	34985253	35180738	195486	DUP	ASD	hg19
7	37890179	37924905	34727	DEL	ASD	hg19
7	37905075	37924905	19831	DUP	ASD	hg19
7	38370350	38393812	23463	DEL	ASD	hg19
7	38388712	38398423	9712	DEL	ASD	hg19
7	49977072	50121546	144475	DEL	ASD	hg19
7	50022886	50136234	113349	DEL	ASD	hg19
7	56066628	56123492	56865	DEL	ASD	hg19
7	66456072	66474673	18602	DEL	ASD	hg19
7	74172262	74193819	21558	DEL	ASD	hg19
7	75045258	75048771	3514	DEL	ASD	hg19
7	75045258	75048771	3514	DEL	ASD	hg19
7	75045258	75052490	7233	DEL	ASD	hg19
7	75045258	75052490	7233	DEL	ASD	hg19
7	76889323	76908471	19149	DUP	ASD	hg19
7	80285804	80303514	17711	DEL	ASD	hg19
7	80292254	80303514	11261	DUP	ASD	hg19
7	81591704	81689894	98191	DUP	ASD	hg19
7	81591704	81695891	104188	DUP	ASD	hg19
7	81594858	81766043	171186	DUP	ASD	hg19
7	91609551	91714305	104755	DUP	ASD	hg19
7	91621420	91713039	91620	DUP	ASD	hg19
7	91624865	91730421	105557	DEL	ASD	hg19
7	91630110	91646467	16358	DUP	ASD	hg19
7	91674270	91719007	44738	DEL	ASD	hg19
7	91674270	91736787	62518	DEL	ASD	hg19
7	91788307	91871500	83194	DUP	ASD	hg19
7	91788307	91871500	83194	DUP	ASD	hg19
7	91792598	91870517	77920	DEL	ASD	hg19
7	91792598	91871500	78903	DUP	ASD	hg19
7	91792598	91871500	78903	DUP	ASD	hg19
7	91842457	91865011	22555	DEL	ASD	hg19
7	91854982	91870517	15536	DUP	ASD	hg19
7	94931465	95053948	122484	DEL	ASD	hg19
7	94937271	95053948	116678	DEL	ASD	hg19
7	95800729	95820610	19882	DEL	ASD	hg19
7	99315097	99358606	43510	DEL	ASD	hg19
7	99315097	99358606	43510	DEL	ASD	hg19
7	100331707	100336236	4530	DEL	ASD	hg19
7	100331707	100336236	4530	DEL	ASD	hg19
7	100333318	100336236	2919	DEL	ASD	hg19
7	102309298	102322594	13297	DUP	ASD	hg19
7	102309298	102322594	13297	DEL	ASD	hg19
7	102309298	102322594	13297	DEL	ASD	hg19
7	102309298	102322594	13297	DEL	ASD	hg19
7	102309298	102322594	13297	DEL	ASD	hg19
7	102309298	102322594	13297	DEL	ASD	hg19
7	102309298	102322594	13297	DEL	ASD	hg19
7	102309298	102322594	13297	DUP	ASD	hg19
7	102309298	102322594	13297	DEL	ASD	hg19
7	102309298	102322594	13297	DEL	ASD	hg19
7	102309298	102322594	13297	DEL	ASD	hg19
7	102850633	102878361	27729	DUP	ASD	hg19
7	106871008	107198611	327604	DEL	ASD	hg19
7	106871008	107198611	327604	DEL	ASD	hg19
7	106888789	107198611	309823	DUP	ASD	hg19
7	107114503	107198611	84109	DEL	ASD	hg19
7	116397439	116423574	26136	DEL	ASD	hg19
7	117008663	117023166	14504	DUP	ASD	hg19
7	121738452	121769642	31191	DUP	ASD	hg19
7	121741623	121757062	15440	DEL	ASD	hg19
7	127975849	127979426	3578	DEL	ASD	hg19
7	140439560	140507913	68354	DEL	ASD	hg19
7	140439560	140508846	69287	DEL	ASD	hg19
7	140453935	140507913	53979	DEL	ASD	hg19
7	143140543	143321497	180955	DEL	ASD	hg19
7	143140543	143321497	180955	DEL	ASD	hg19
7	143174963	143340078	165116	DEL	ASD	hg19
7	143174963	143340078	165116	DEL	ASD	hg19
7	143174963	143340078	165116	DEL	ASD	hg19
7	143268898	143341219	72322	DEL	ASD	hg19
7	143268898	143341219	72322	DEL	ASD	hg19
7	143268898	143341219	72322	DEL	ASD	hg19
7	143268898	143341219	72322	DEL	ASD	hg19
7	143880584	143966343	85760	DUP	ASD	hg19
7	143955778	144062918	107141	DEL	ASD	hg19
8	7300338	7308733	8396	DEL	ASD	hg19
8	7620888	7637627	16740	DEL	ASD	hg19
8	7620888	7637627	16740	DEL	ASD	hg19
8	7627115	7637627	10513	DEL	ASD	hg19
8	7627115	7637627	10513	DEL	ASD	hg19
8	7627115	7637627	10513	DEL	ASD	hg19
8	7806649	7835573	28925	DEL	ASD	hg19
8	7806649	7835573	28925	DEL	ASD	hg19
8	7806649	7835573	28925	DEL	ASD	hg19
8	7806649	7835573	28925	DEL	ASD	hg19
8	11970069	12043040	72972	DEL	ASD	hg19
8	11970069	12049368	79300	DEL	ASD	hg19
8	11970069	12049368	79300	DEL	ASD	hg19
8	12215123	12274982	59860	DEL	ASD	hg19
8	12274164	12285321	11158	DEL	ASD	hg19
8	12274164	12285321	11158	DEL	ASD	hg19
8	12274164	12285321	11158	DEL	ASD	hg19
8	12274164	12285321	11158	DEL	ASD	hg19
8	12274164	12286409	12246	DEL	ASD	hg19
8	12274164	12286409	12246	DEL	ASD	hg19
8	12274164	12286409	12246	DEL	ASD	hg19
8	12274164	12286409	12246	DEL	ASD	hg19
8	12274164	12286409	12246	DEL	ASD	hg19
8	12274164	12286409	12246	DEL	ASD	hg19
8	12274164	12286409	12246	DEL	ASD	hg19
8	12274164	12286409	12246	DEL	ASD	hg19
8	12274164	12286409	12246	DEL	ASD	hg19
8	12274164	12286409	12246	DEL	ASD	hg19
8	12274164	12286409	12246	DEL	ASD	hg19
8	12274164	12286409	12246	DEL	ASD	hg19
8	12274164	12286409	12246	DEL	ASD	hg19
8	12274164	12286409	12246	DEL	ASD	hg19
8	12274164	12286409	12246	DEL	ASD	hg19
8	12274164	12286409	12246	DEL	ASD	hg19
8	12274164	12286409	12246	DEL	ASD	hg19
8	12274164	12286409	12246	DEL	ASD	hg19
8	17924677	17933147	8471	DUP	ASD	hg19
8	27632980	27645570	12591	DUP	ASD	hg19
8	27633827	27646546	12720	DUP	ASD	hg19
8	29921337	29931573	10237	DUP	ASD	hg19
8	30916617	30945487	28871	DUP	ASD	hg19
8	30916617	30982567	65951	DUP	ASD	hg19
8	30916617	31012312	95696	DUP	ASD	hg19
8	30925722	30942813	17092	DUP	ASD	hg19
8	30933637	30945487	11851	DUP	ASD	hg19
8	53542957	53573576	30620	DUP	ASD	hg19
8	72946431	72971724	25294	DUP	ASD	hg19
8	72951048	72963157	12110	DUP	ASD	hg19
8	72951048	72963157	12110	DUP	ASD	hg19
8	72974982	72984153	9172	DEL	ASD	hg19
8	90947734	90993802	46069	DUP	ASD	hg19
8	90949202	90965970	16769	DUP	ASD	hg19
8	90955429	90993172	37744	DUP	ASD	hg19
8	90965420	90982836	17417	DEL	ASD	hg19
8	94776018	94821440	45423	DEL	ASD	hg19
8	94776018	94828743	52726	DUP	ASD	hg19
8	96057721	96070216	12496	DUP	ASD	hg19
8	100050599	100128153	77555	DUP	ASD	hg19
8	100050599	100128153	77555	DUP	ASD	hg19
8	100050599	100160289	109691	DUP	ASD	hg19
8	100050599	100160289	109691	DUP	ASD	hg19
8	100147191	100847603	700413	DEL	ASD	hg19
8	100147772	100833761	685990	DEL	ASD	hg19
8	103220309	103238313	18005	DEL	ASD	hg19
8	113316898	114290984	974087	DEL	ASD	hg19
8	113364593	113420693	56101	DUP	ASD	hg19
8	120756476	120816310	59835	DEL	ASD	hg19
8	120756476	120816310	59835	DEL	ASD	hg19
8	120768194	120859325	91132	DUP	ASD	hg19
8	120800526	120847243	46718	DUP	ASD	hg19
8	120801780	120810137	8358	DEL	ASD	hg19
8	120801780	120810137	8358	DEL	ASD	hg19
8	121463408	121471591	8184	DUP	ASD	hg19
8	126071412	126087404	15993	DEL	ASD	hg19
8	141285705	141310764	25060	DEL	ASD	hg19
9	146029	175791	29763	DUP	ASD	hg19
9	17166815	17502652	335838	DUP	ASD	hg19
9	21077302	21334909	257608	DEL	ASD	hg19
9	26990059	27056459	66401	DUP	ASD	hg19
9	33543108	33567349	24242	DUP	ASD	hg19
9	33543108	33567349	24242	DUP	ASD	hg19
9	38571921	38601214	29294	DUP	ASD	hg19
9	38576978	38601214	24237	DUP	ASD	hg19
9	43624642	43737520	112879	DEL	ASD	hg19
9	43624642	43828255	203614	DEL	ASD	hg19
9	47312346	65508214	18195869	DUP	ASD	hg19
9	47312346	65508214	18195869	DEL	ASD	hg19
9	47314025	65509583	18195559	DEL	ASD	hg19
9	65503502	65647464	143963	DEL	ASD	hg19
9	65503502	65647464	143963	DEL	ASD	hg19
9	65503502	65647464	143963	DEL	ASD	hg19
9	67964962	67985988	21027	DUP	ASD	hg19
9	69403059	69424178	21120	DUP	ASD	hg19
9	69403059	69448016	44958	DUP	ASD	hg19
9	72893364	72915149	21786	DEL	ASD	hg19
9	75303573	75366923	63351	DEL	ASD	hg19
9	75303573	75407032	103460	DEL	ASD	hg19
9	75303573	75445486	141914	DEL	ASD	hg19
9	75315382	75387522	72141	DUP	ASD	hg19
9	75354983	75387522	32540	DUP	ASD	hg19
9	75357308	75407032	49725	DEL	ASD	hg19
9	75357308	75451007	93700	DEL	ASD	hg19
9	75387277	75420467	33191	DEL	ASD	hg19
9	75407055	75451007	43953	DEL	ASD	hg19
9	77339477	77457310	117834	DEL	ASD	hg19
9	77347543	77362887	15345	DUP	ASD	hg19
9	77353271	77359130	5860	DEL	ASD	hg19
9	77353271	77457310	104040	DEL	ASD	hg19
9	77353271	77457310	104040	DEL	ASD	hg19
9	77418658	77431931	13274	DEL	ASD	hg19
9	77418658	77431931	13274	DEL	ASD	hg19
9	79814809	80022586	207778	DUP	ASD	hg19
9	79814809	80022586	207778	DUP	ASD	hg19
9	79814809	80022586	207778	DUP	ASD	hg19
9	79816229	80018288	202060	DUP	ASD	hg19
9	79824287	80022586	198300	DUP	ASD	hg19
9	79834818	79947080	112263	DEL	ASD	hg19
9	79834818	79954878	120061	DEL	ASD	hg19
9	86356803	86383887	27085	DUP	ASD	hg19
9	91940290	91953546	13257	DUP	ASD	hg19
9	93976558	94057079	80522	DUP	ASD	hg19
9	93976558	94118303	141746	DUP	ASD	hg19
9	93976558	94118488	141931	DUP	ASD	hg19
9	94809843	94830431	20589	DEL	ASD	hg19
9	95155365	95219769	64405	DEL	ASD	hg19
9	100444480	100456092	11613	DUP	ASD	hg19
9	108363374	108382393	19020	DEL	ASD	hg19
9	114470062	114548315	78254	DUP	ASD	hg19
9	117072826	117087434	14609	DUP	ASD	hg19
9	117072826	117087434	14609	DUP	ASD	hg19
9	117085411	117088654	3244	DUP	ASD	hg19
9	117085411	117088654	3244	DUP	ASD	hg19
9	123173584	123199856	26273	DEL	ASD	hg19
9	123173584	123199856	26273	DEL	ASD	hg19
9	123714965	123850823	135859	DUP	ASD	hg19
9	123715956	123725296	9341	DEL	ASD	hg19
9	123715956	123732580	16625	DEL	ASD	hg19
9	123715956	123770827	54872	DEL	ASD	hg19
9	123715956	123785848	69893	DEL	ASD	hg19
9	123715956	123785848	69893	DEL	ASD	hg19
9	123715956	123870275	154320	DUP	ASD	hg19
9	123734156	123785848	51693	DEL	ASD	hg19
9	123789386	123808712	19327	DUP	ASD	hg19
9	128061198	128088870	27673	DEL	ASD	hg19
9	135144950	135172492	27543	DEL	ASD	hg19
9	135144950	135172492	27543	DEL	ASD	hg19
9	135150591	135221909	71319	DUP	ASD	hg19
9	135150591	135221909	71319	DUP	ASD	hg19
9	135161758	135221909	60152	DUP	ASD	hg19
9	135163885	135221909	58025	DEL	ASD	hg19
9	135163885	135221909	58025	DEL	ASD	hg19
9	135163885	135221909	58025	DEL	ASD	hg19
9	135163885	135221909	58025	DEL	ASD	hg19
9	135173415	135221909	48495	DEL	ASD	hg19
9	135173415	135221909	48495	DEL	ASD	hg19
9	135175965	135221909	45945	DUP	ASD	hg19
9	135187092	135221909	34818	DUP	ASD	hg19
9	135201659	135221909	20251	DUP	ASD	hg19
9	135201659	135221909	20251	DUP	ASD	hg19
9	135201659	135221909	20251	DUP	ASD	hg19
9	136083853	136135296	51444	DEL	ASD	hg19
9	136131041	136136798	5758	DEL	ASD	hg19
9	136131041	136136798	5758	DEL	ASD	hg19
9	136132794	136137586	4793	DEL	ASD	hg19
9	136132794	136137586	4793	DEL	ASD	hg19
9	136298446	136305697	7252	DUP	ASD	hg19
9	136298446	136308733	10288	DEL	ASD	hg19
9	136298446	136308733	10288	DEL	ASD	hg19
9	136298446	136308733	10288	DEL	ASD	hg19
9	136298446	136308733	10288	DEL	ASD	hg19
9	136298446	136308733	10288	DEL	ASD	hg19
9	136298446	136308733	10288	DEL	ASD	hg19
9	136298446	136308733	10288	DEL	ASD	hg19
9	136298446	136308733	10288	DEL	ASD	hg19
9	139981809	139990894	9086	DEL	ASD	hg19
10	17277793	17363347	85555	DEL	ASD	hg19
10	18087542	18122794	35253	DEL	ASD	hg19
10	18087542	18122794	35253	DEL	ASD	hg19
10	21102816	21186185	83370	DUP	ASD	hg19
10	21102816	21186185	83370	DUP	ASD	hg19
10	26240988	26459519	218532	DUP	ASD	hg19
10	26240988	26459519	218532	DUP	ASD	hg19
10	26240988	26463537	222550	DUP	ASD	hg19
10	26243751	26417518	173768	DEL	ASD	hg19
10	26243751	26436539	192789	DEL	ASD	hg19
10	26243751	26436539	192789	DEL	ASD	hg19
10	26312899	26359195	46297	DEL	ASD	hg19
10	26312899	26359381	46483	DEL	ASD	hg19
10	26312899	26436539	123641	DEL	ASD	hg19
10	27294467	27381492	87026	DUP	ASD	hg19
10	27303371	27329158	25788	DUP	ASD	hg19
10	27303371	27350222	46852	DUP	ASD	hg19
10	27303371	27353061	49691	DUP	ASD	hg19
10	27303371	27366673	63303	DUP	ASD	hg19
10	27798751	27831166	32416	DUP	ASD	hg19
10	37433850	37455628	21779	DUP	ASD	hg19
10	37438543	37508827	70285	DUP	ASD	hg19
10	37478390	37508827	30438	DUP	ASD	hg19
10	47755401	47758983	3583	DEL	ASD	hg19
10	47755401	47758983	3583	DEL	ASD	hg19
10	47755401	47758983	3583	DEL	ASD	hg19
10	47755401	47758983	3583	DEL	ASD	hg19
10	47755401	47758983	3583	DEL	ASD	hg19
10	47756012	47759816	3805	DEL	ASD	hg19
10	47756012	47759816	3805	DEL	ASD	hg19
10	47756012	47759816	3805	DEL	ASD	hg19
10	47756012	47759816	3805	DEL	ASD	hg19
10	47756012	47759816	3805	DEL	ASD	hg19
10	47756012	47759816	3805	DEL	ASD	hg19
10	47756012	47759816	3805	DEL	ASD	hg19
10	47756012	47759816	3805	DEL	ASD	hg19
10	47756012	47759816	3805	DEL	ASD	hg19
10	47943425	47949428	6004	DEL	ASD	hg19
10	49313198	49348487	35290	DEL	ASD	hg19
10	49313198	49348487	35290	DEL	ASD	hg19
10	49313198	49381175	67978	DEL	ASD	hg19
10	50668367	50686567	18201	DUP	ASD	hg19
10	51623055	51633029	9975	DEL	ASD	hg19
10	51889165	51893280	4116	DEL	ASD	hg19
10	51889165	51893280	4116	DEL	ASD	hg19
10	55616883	56287688	670806	DEL	ASD	hg19
10	55616883	56424073	807191	DEL	ASD	hg19
10	55616883	56424073	807191	DEL	ASD	hg19
10	60145928	60154291	8364	DEL	ASD	hg19
10	60145928	60154885	8958	DEL	ASD	hg19
10	60145928	60154885	8958	DEL	ASD	hg19
10	60145928	60154885	8958	DEL	ASD	hg19
10	60145928	60154885	8958	DEL	ASD	hg19
10	60145928	60154885	8958	DUP	ASD	hg19
10	70530960	70549674	18715	DUP	ASD	hg19
10	73887788	73956798	69011	DEL	ASD	hg19
10	73887788	73958460	70673	DEL	ASD	hg19
10	74803572	74831940	28369	DEL	ASD	hg19
10	75960470	76285235	324766	DUP	ASD	hg19
10	75960470	76285235	324766	DUP	ASD	hg19
10	75960470	76285235	324766	DUP	ASD	hg19
10	75960470	76349126	388657	DUP	ASD	hg19
10	76284962	76781094	496133	DEL	ASD	hg19
10	76284962	76781094	496133	DEL	ASD	hg19
10	76284962	76781094	496133	DEL	ASD	hg19
10	81463353	81472243	8891	DEL	ASD	hg19
10	81463353	81472243	8891	DEL	ASD	hg19
10	81470125	81601884	131760	DUP	ASD	hg19
10	81601484	81610364	8881	DEL	ASD	hg19
10	81601484	81610364	8881	DEL	ASD	hg19
10	81601484	81610364	8881	DEL	ASD	hg19
10	81601484	81610364	8881	DEL	ASD	hg19
10	81601484	81610364	8881	DEL	ASD	hg19
10	81601484	81610364	8881	DEL	ASD	hg19
10	81601484	81610364	8881	DEL	ASD	hg19
10	81601484	81610364	8881	DEL	ASD	hg19
10	81601484	81610364	8881	DEL	ASD	hg19
10	81601484	81610364	8881	DEL	ASD	hg19
10	81601484	81610364	8881	DEL	ASD	hg19
10	81601484	81610364	8881	DEL	ASD	hg19
10	81601484	81610364	8881	DEL	ASD	hg19
10	81603916	81609243	5328	DEL	ASD	hg19
10	81603916	81609243	5328	DEL	ASD	hg19
10	81603916	81609243	5328	DEL	ASD	hg19
10	81603916	81609243	5328	DEL	ASD	hg19
10	81603916	81609243	5328	DEL	ASD	hg19
10	81603916	81609243	5328	DEL	ASD	hg19
10	81603916	81609243	5328	DEL	ASD	hg19
10	81603916	81609243	5328	DEL	ASD	hg19
10	81603916	81609243	5328	DEL	ASD	hg19
10	81603916	81609243	5328	DEL	ASD	hg19
10	81603916	81609243	5328	DEL	ASD	hg19
10	81603916	81609243	5328	DEL	ASD	hg19
10	81603916	81609243	5328	DEL	ASD	hg19
10	81603916	81609243	5328	DEL	ASD	hg19
10	81603916	81609243	5328	DEL	ASD	hg19
10	81603916	81609243	5328	DEL	ASD	hg19
10	81607644	81697986	90343	DUP	ASD	hg19
10	88935644	88985975	50332	DEL	ASD	hg19
10	88935644	88985975	50332	DEL	ASD	hg19
10	88985575	89124964	139390	DEL	ASD	hg19
10	90770244	90775548	5305	DUP	ASD	hg19
10	90770244	90775548	5305	DUP	ASD	hg19
10	97684058	97779626	95569	DUP	ASD	hg19
10	98312682	98336588	23907	DUP	ASD	hg19
10	101949303	101985825	36523	DUP	ASD	hg19
10	101950574	101985825	35252	DEL	ASD	hg19
10	101950574	101985825	35252	DEL	ASD	hg19
10	101950574	101985825	35252	DEL	ASD	hg19
10	101959676	101978940	19265	DEL	ASD	hg19
10	101959676	101979167	19492	DEL	ASD	hg19
10	101959676	101985825	26150	DEL	ASD	hg19
10	101959676	101985825	26150	DUP	ASD	hg19
10	101966935	101982788	15854	DUP	ASD	hg19
10	101966935	101985825	18891	DUP	ASD	hg19
10	102689564	102705265	15702	DUP	ASD	hg19
10	104857709	104860880	3172	DUP	ASD	hg19
10	105838248	105885464	47217	DEL	ASD	hg19
10	105889894	105900797	10904	DUP	ASD	hg19
10	112328644	112364111	35468	DUP	ASD	hg19
10	112340610	112361987	21378	DEL	ASD	hg19
10	112724065	113941593	1217529	DEL	ASD	hg19
10	112745334	112767462	22129	DEL	ASD	hg19
10	112745334	112767462	22129	DEL	ASD	hg19
10	112745334	113941593	1196260	DEL	ASD	hg19
10	112748612	112769194	20583	DUP	ASD	hg19
10	112748612	112769194	20583	DUP	ASD	hg19
10	112748612	112769194	20583	DUP	ASD	hg19
10	112748612	112769194	20583	DUP	ASD	hg19
10	112748612	112769194	20583	DUP	ASD	hg19
10	113923407	113941593	18187	DEL	ASD	hg19
10	113926108	113932875	6768	DEL	ASD	hg19
10	115904253	115923088	18836	DUP	ASD	hg19
10	118100243	118138080	37838	DUP	ASD	hg19
10	118100243	118187599	87357	DUP	ASD	hg19
10	118100243	118187599	87357	DUP	ASD	hg19
10	122611984	122661885	49902	DEL	ASD	hg19
10	122624507	122663705	39199	DUP	ASD	hg19
10	122626526	122661885	35360	DEL	ASD	hg19
10	122626526	122663705	37180	DEL	ASD	hg19
10	122626526	122663705	37180	DUP	ASD	hg19
10	122637813	122646399	8587	DEL	ASD	hg19
10	122640286	122663705	23420	DEL	ASD	hg19
10	124344755	124353149	8395	DEL	ASD	hg19
10	124345574	124352111	6538	DEL	ASD	hg19
10	124345574	124352111	6538	DEL	ASD	hg19
10	124345574	124352111	6538	DEL	ASD	hg19
10	127409721	127436314	26594	DEL	ASD	hg19
10	127411585	127424524	12940	DUP	ASD	hg19
10	127418798	127431896	13099	DEL	ASD	hg19
11	552526	556375	3850	DUP	ASD	hg19
11	3239172	3381797	142626	DEL	ASD	hg19
11	3735045	3746451	11407	DUP	ASD	hg19
11	6735841	7065266	329426	DEL	ASD	hg19
11	7060890	7079129	18240	DUP	ASD	hg19
11	7067847	7083785	15939	DUP	ASD	hg19
11	7067847	7091738	23892	DEL	ASD	hg19
11	7067847	7091738	23892	DEL	ASD	hg19
11	7067847	7091738	23892	DEL	ASD	hg19
11	7067847	7091738	23892	DEL	ASD	hg19
11	7067847	7092590	24744	DUP	ASD	hg19
11	7067847	7092590	24744	DUP	ASD	hg19
11	9228167	9456580	228414	DUP	ASD	hg19
11	9805846	10215585	409740	DEL	ASD	hg19
11	9864120	10024287	160168	DEL	ASD	hg19
11	9864120	10215585	351466	DEL	ASD	hg19
11	9874171	10215585	341415	DUP	ASD	hg19
11	9917438	10215585	298148	DEL	ASD	hg19
11	10014485	10024287	9803	DUP	ASD	hg19
11	10014485	10024287	9803	DUP	ASD	hg19
11	10015416	10050145	34730	DUP	ASD	hg19
11	14487825	14529314	41490	DEL	ASD	hg19
11	14793480	14839941	46462	DEL	ASD	hg19
11	17140189	17332559	192371	DUP	ASD	hg19
11	17141330	17153587	12258	DUP	ASD	hg19
11	17141330	17153587	12258	DUP	ASD	hg19
11	17143682	17156578	12897	DUP	ASD	hg19
11	17143682	17167494	23813	DUP	ASD	hg19
11	18041190	18057740	16551	DUP	ASD	hg19
11	18044293	18050959	6667	DUP	ASD	hg19
11	18044293	18062372	18080	DUP	ASD	hg19
11	18044293	18062372	18080	DUP	ASD	hg19
11	18044293	18062372	18080	DUP	ASD	hg19
11	18044293	18062372	18080	DUP	ASD	hg19
11	18044293	18062372	18080	DUP	ASD	hg19
11	18305290	18330677	25388	DEL	ASD	hg19
11	18305290	18330677	25388	DUP	ASD	hg19
11	18305290	18333049	27760	DEL	ASD	hg19
11	18317494	18327091	9598	DUP	ASD	hg19
11	19172255	19192146	19892	DUP	ASD	hg19
11	20413674	20473765	60092	DUP	ASD	hg19
11	22232758	22297796	65039	DEL	ASD	hg19
11	22242591	22297796	55206	DEL	ASD	hg19
11	22242591	22301362	58772	DEL	ASD	hg19
11	22242591	22301362	58772	DUP	ASD	hg19
11	22242591	22301362	58772	DUP	ASD	hg19
11	22242591	22301362	58772	DUP	ASD	hg19
11	22242591	22301362	58772	DUP	ASD	hg19
11	22242591	22398220	155630	DEL	ASD	hg19
11	22248796	22301362	52567	DEL	ASD	hg19
11	22248796	22301362	52567	DEL	ASD	hg19
11	22257657	22297796	40140	DEL	ASD	hg19
11	22272445	22284640	12196	DUP	ASD	hg19
11	22276865	22301362	24498	DEL	ASD	hg19
11	32611090	33055003	443914	DUP	ASD	hg19
11	32624354	32705127	80774	DUP	ASD	hg19
11	32976789	32997102	20314	DUP	ASD	hg19
11	46819627	46842804	23178	DEL	ASD	hg19
11	55032374	55945034	912661	DEL	ASD	hg19
11	55033073	55136396	103324	DEL	ASD	hg19
11	55035727	55945034	909308	DEL	ASD	hg19
11	55135357	55419317	283961	DUP	ASD	hg19
11	55321780	55419317	97538	DEL	ASD	hg19
11	55339601	55433574	93974	DEL	ASD	hg19
11	55370914	55541860	170947	DUP	ASD	hg19
11	55370914	55541860	170947	DEL	ASD	hg19
11	55370914	55541860	170947	DUP	ASD	hg19
11	56184731	56805742	621012	DEL	ASD	hg19
11	57970673	58207626	236954	DEL	ASD	hg19
11	57970673	58207626	236954	DEL	ASD	hg19
11	59857757	59863180	5424	DEL	ASD	hg19
11	59857757	59863180	5424	DUP	ASD	hg19
11	59857757	59863180	5424	DUP	ASD	hg19
11	64074649	64083440	8792	DUP	ASD	hg19
11	68305130	68326191	21062	DEL	ASD	hg19
11	68305130	68326191	21062	DEL	ASD	hg19
11	68305130	68326191	21062	DEL	ASD	hg19
11	68305130	68326191	21062	DEL	ASD	hg19
11	73814173	73850875	36703	DEL	ASD	hg19
11	73817413	73844604	27192	DEL	ASD	hg19
11	74053927	74058384	4458	DEL	ASD	hg19
11	76637598	76701650	64053	DUP	ASD	hg19
11	77824880	77832289	7410	DUP	ASD	hg19
11	77824880	77835311	10432	DUP	ASD	hg19
11	77824880	77838533	13654	DEL	ASD	hg19
11	77824880	77838533	13654	DEL	ASD	hg19
11	77824880	77838533	13654	DEL	ASD	hg19
11	77824880	77838533	13654	DUP	ASD	hg19
11	77824880	77838533	13654	DUP	ASD	hg19
11	77824880	77838533	13654	DUP	ASD	hg19
11	77824880	77838533	13654	DUP	ASD	hg19
11	77824880	77838533	13654	DUP	ASD	hg19
11	77824880	77838533	13654	DUP	ASD	hg19
11	85718495	85733514	15020	DUP	ASD	hg19
11	85718495	85737421	18927	DUP	ASD	hg19
11	85718495	85737421	18927	DUP	ASD	hg19
11	86778684	87039878	261195	DUP	ASD	hg19
11	86778684	87039878	261195	DUP	ASD	hg19
11	86778684	87039878	261195	DUP	ASD	hg19
11	86802352	87039878	237527	DUP	ASD	hg19
11	87006772	87039878	33107	DUP	ASD	hg19
11	87024415	87039878	15464	DUP	ASD	hg19
11	87024415	87039878	15464	DUP	ASD	hg19
11	89449056	89533040	83985	DEL	ASD	hg19
11	89606396	89645323	38928	DUP	ASD	hg19
11	89701659	89715293	13635	DEL	ASD	hg19
11	89701659	89715293	13635	DEL	ASD	hg19
11	89701659	89715293	13635	DEL	ASD	hg19
11	89701659	89715293	13635	DEL	ASD	hg19
11	89701659	89715293	13635	DEL	ASD	hg19
11	89701659	89715293	13635	DEL	ASD	hg19
11	89701659	89715293	13635	DEL	ASD	hg19
11	89701659	89715293	13635	DEL	ASD	hg19
11	89701659	89715293	13635	DEL	ASD	hg19
11	89701659	89715293	13635	DEL	ASD	hg19
11	89701659	89715293	13635	DEL	ASD	hg19
11	89701659	89715293	13635	DEL	ASD	hg19
11	89701659	89715293	13635	DEL	ASD	hg19
11	89701659	89715293	13635	DEL	ASD	hg19
11	89701659	89715293	13635	DEL	ASD	hg19
11	89701659	89715293	13635	DEL	ASD	hg19
11	89701659	89715293	13635	DEL	ASD	hg19
11	89701659	89715293	13635	DEL	ASD	hg19
11	89701659	89715293	13635	DEL	ASD	hg19
11	89701659	89715293	13635	DEL	ASD	hg19
11	89703339	89715293	11955	DEL	ASD	hg19
11	89703339	89715293	11955	DUP	ASD	hg19
11	89703339	89715293	11955	DEL	ASD	hg19
11	89703339	89715293	11955	DUP	ASD	hg19
11	89703339	89719203	15865	DUP	ASD	hg19
11	89774216	89820299	46084	DEL	ASD	hg19
11	89774216	89820299	46084	DEL	ASD	hg19
11	89774216	89820299	46084	DEL	ASD	hg19
11	89774216	89820299	46084	DEL	ASD	hg19
11	89774216	89820299	46084	DEL	ASD	hg19
11	89774216	89820299	46084	DEL	ASD	hg19
11	89804274	89868017	63744	DEL	ASD	hg19
11	93090052	93127822	37771	DUP	ASD	hg19
11	94153239	94224182	70944	DUP	ASD	hg19
11	94168946	94219301	50356	DEL	ASD	hg19
11	94910869	94923127	12259	DEL	ASD	hg19
11	95546031	95581114	35084	DEL	ASD	hg19
11	95546031	95621476	75446	DEL	ASD	hg19
11	95546031	95621476	75446	DEL	ASD	hg19
11	95571206	95621476	50271	DUP	ASD	hg19
11	101765558	101778691	13134	DUP	ASD	hg19
11	102984780	103153026	168247	DUP	ASD	hg19
11	103106399	103126983	20585	DUP	ASD	hg19
11	107925371	108277692	352322	DUP	ASD	hg19
11	108005817	108203678	197862	DEL	ASD	hg19
11	108010740	108276333	265594	DUP	ASD	hg19
11	108010740	108277692	266953	DUP	ASD	hg19
11	108010740	108277692	266953	DUP	ASD	hg19
11	108010740	108277692	266953	DUP	ASD	hg19
11	108014658	108203678	189021	DEL	ASD	hg19
11	108014658	108216686	202029	DEL	ASD	hg19
11	108017945	108044629	26685	DEL	ASD	hg19
11	108017945	108044629	26685	DEL	ASD	hg19
11	108029617	108203678	174062	DUP	ASD	hg19
11	108047669	108203678	156010	DEL	ASD	hg19
11	108106345	108119880	13536	DUP	ASD	hg19
11	110118376	110128965	10590	DUP	ASD	hg19
11	110118376	110128965	10590	DUP	ASD	hg19
11	110118376	110128965	10590	DUP	ASD	hg19
11	110118376	110128965	10590	DUP	ASD	hg19
11	110118376	110128965	10590	DUP	ASD	hg19
11	111948936	111956188	7253	DUP	ASD	hg19
11	112014317	112025786	11470	DUP	ASD	hg19
11	112014317	112041255	26939	DUP	ASD	hg19
11	112072743	112104329	31587	DEL	ASD	hg19
11	112072743	112104329	31587	DEL	ASD	hg19
11	112085482	112104329	18848	DEL	ASD	hg19
11	119103106	119168242	65137	DEL	ASD	hg19
11	121061363	121178272	116910	DEL	ASD	hg19
11	121061363	121178272	116910	DEL	ASD	hg19
11	121061363	121178272	116910	DEL	ASD	hg19
11	121061363	121178272	116910	DEL	ASD	hg19
11	121061363	121178272	116910	DEL	ASD	hg19
11	121061363	121178272	116910	DUP	ASD	hg19
11	121061363	121178272	116910	DUP	ASD	hg19
11	121061363	121178272	116910	DUP	ASD	hg19
11	121061363	121178272	116910	DEL	ASD	hg19
11	121061363	121178272	116910	DUP	ASD	hg19
11	121061363	121178272	116910	DUP	ASD	hg19
11	121061363	121178272	116910	DUP	ASD	hg19
11	121061363	121178272	116910	DUP	ASD	hg19
11	122829953	122932034	102082	DEL	ASD	hg19
11	124095396	124267249	171854	DEL	ASD	hg19
11	125497499	125523744	26246	DUP	ASD	hg19
12	443355	495191	51837	DEL	ASD	hg19
12	922756	968681	45926	DUP	ASD	hg19
12	10572960	10586543	13584	DEL	ASD	hg19
12	10572960	10586543	13584	DEL	ASD	hg19
12	10583713	10599263	15551	DUP	ASD	hg19
12	10583713	10601989	18277	DUP	ASD	hg19
12	10583713	10763300	179588	DUP	ASD	hg19
12	15273924	15733100	459177	DEL	ASD	hg19
12	15273924	15733816	459893	DEL	ASD	hg19
12	15636856	15657054	20199	DEL	ASD	hg19
12	15636856	15657054	20199	DEL	ASD	hg19
12	18837012	18889328	52317	DUP	ASD	hg19
12	18838526	18852935	14410	DUP	ASD	hg19
12	18840971	18889328	48358	DUP	ASD	hg19
12	18840971	18889328	48358	DUP	ASD	hg19
12	18849032	18889328	40297	DUP	ASD	hg19
12	20893115	21428360	535246	DUP	ASD	hg19
12	21007919	21168721	160803	DUP	ASD	hg19
12	21242830	21350173	107344	DUP	ASD	hg19
12	21242830	21355671	112842	DUP	ASD	hg19
12	21294399	21350173	55775	DUP	ASD	hg19
12	21294399	21392174	97776	DUP	ASD	hg19
12	21325532	21350173	24642	DUP	ASD	hg19
12	21327459	21422703	95245	DEL	ASD	hg19
12	21689836	22016039	326204	DEL	ASD	hg19
12	21692140	22215402	523263	DEL	ASD	hg19
12	32863811	32875618	11808	DEL	ASD	hg19
12	32863811	32884119	20309	DEL	ASD	hg19
12	32863811	32900348	36538	DEL	ASD	hg19
12	32873546	32886792	13247	DUP	ASD	hg19
12	39688174	39947935	259762	DEL	ASD	hg19
12	39696715	39734947	38233	DEL	ASD	hg19
12	39720014	39734947	14934	DEL	ASD	hg19
12	40626024	40758943	132920	DEL	ASD	hg19
12	40668333	40758943	90611	DEL	ASD	hg19
12	40742159	40758943	16785	DUP	ASD	hg19
12	42481555	42503535	21981	DUP	ASD	hg19
12	43860413	44180570	320158	DUP	ASD	hg19
12	44148136	44171598	23463	DEL	ASD	hg19
12	44148136	44171598	23463	DEL	ASD	hg19
12	44148136	44171598	23463	DEL	ASD	hg19
12	44148136	44172156	24021	DEL	ASD	hg19
12	45741759	45823145	81387	DEL	ASD	hg19
12	45742249	45823145	80897	DEL	ASD	hg19
12	48062696	48075602	12907	DEL	ASD	hg19
12	48062696	48075602	12907	DEL	ASD	hg19
12	51213375	51279339	65965	DUP	ASD	hg19
12	52864864	52867572	2709	DUP	ASD	hg19
12	55420221	55969128	548908	DEL	ASD	hg19
12	55523550	55969128	445579	DEL	ASD	hg19
12	55614806	55969128	354323	DEL	ASD	hg19
12	55614806	55969128	354323	DEL	ASD	hg19
12	55794310	55887102	92793	DEL	ASD	hg19
12	57058170	57065633	7464	DUP	ASD	hg19
12	64020176	64059677	39502	DUP	ASD	hg19
12	65604574	65639770	35197	DUP	ASD	hg19
12	65604574	65639770	35197	DUP	ASD	hg19
12	65604574	65639770	35197	DUP	ASD	hg19
12	65604574	65639770	35197	DUP	ASD	hg19
12	72037872	72051083	13212	DEL	ASD	hg19
12	85408194	88900206	3492013	DUP	ASD	hg19
12	88442959	88471121	28163	DUP	ASD	hg19
12	98921612	98940276	18665	DUP	ASD	hg19
12	98921612	99117141	195530	DEL	ASD	hg19
12	98921612	99117593	195982	DEL	ASD	hg19
12	98921612	99126395	204784	DEL	ASD	hg19
12	99007360	99117593	110234	DEL	ASD	hg19
12	99007360	99126395	119036	DEL	ASD	hg19
12	99056182	99064915	8734	DUP	ASD	hg19
12	99056182	99064915	8734	DUP	ASD	hg19
12	99056182	99064915	8734	DUP	ASD	hg19
12	100431361	100453823	22463	DEL	ASD	hg19
12	102113898	102153972	40075	DUP	ASD	hg19
12	102122640	102141070	18431	DUP	ASD	hg19
12	102122640	102153972	31333	DUP	ASD	hg19
12	105504851	105527725	22875	DUP	ASD	hg19
12	105504851	105551151	46301	DUP	ASD	hg19
12	105504851	105556674	51824	DUP	ASD	hg19
12	105507942	105521118	13177	DUP	ASD	hg19
12	105514819	105521118	6300	DUP	ASD	hg19
12	105514819	105527725	12907	DUP	ASD	hg19
12	105514819	105560760	45942	DEL	ASD	hg19
12	105515844	105527725	11882	DUP	ASD	hg19
12	105534020	105558569	24550	DEL	ASD	hg19
12	106757593	106831608	74016	DUP	ASD	hg19
12	106757593	106848540	90948	DUP	ASD	hg19
12	106760231	106857439	97209	DEL	ASD	hg19
12	110720357	110770541	50185	DEL	ASD	hg19
12	110720357	110771999	51643	DEL	ASD	hg19
12	110720357	110771999	51643	DEL	ASD	hg19
12	110720357	110771999	51643	DUP	ASD	hg19
12	110720357	110771999	51643	DUP	ASD	hg19
12	110720357	110777577	57221	DUP	ASD	hg19
12	115115333	116675561	1560229	DEL	ASD	hg19
12	122694256	122709295	15040	DEL	ASD	hg19
12	122974971	122991475	16505	DUP	ASD	hg19
12	123028704	123034411	5708	DUP	ASD	hg19
12	123028704	123036087	7384	DUP	ASD	hg19
12	124177153	124181796	4644	DUP	ASD	hg19
12	124177153	124181796	4644	DUP	ASD	hg19
13	32899161	32929476	30316	DUP	ASD	hg19
13	32906357	32937721	31365	DEL	ASD	hg19
13	40233449	40301736	68288	DUP	ASD	hg19
13	48517452	48562889	45438	DEL	ASD	hg19
13	48517452	48563167	45716	DEL	ASD	hg19
13	48517452	48571209	53758	DEL	ASD	hg19
13	48517452	48571209	53758	DEL	ASD	hg19
13	48827892	48835411	7520	DEL	ASD	hg19
13	48881364	48947679	66316	DUP	ASD	hg19
14	19377591	19574403	196813	DUP	ASD	hg19
14	19561940	19573172	11233	DUP	ASD	hg19
14	19561940	19573172	11233	DUP	ASD	hg19
14	19561940	19573172	11233	DUP	ASD	hg19
14	20019687	20586599	566913	DEL	ASD	hg19
14	20181082	20404763	223682	DEL	ASD	hg19
14	20181082	20404763	223682	DUP	ASD	hg19
14	20181082	20404763	223682	DUP	ASD	hg19
14	20181082	20404763	223682	DUP	ASD	hg19
14	20181082	20444726	263645	DEL	ASD	hg19
14	20215584	20404763	189180	DUP	ASD	hg19
14	21870094	21883174	13081	DEL	ASD	hg19
14	22929813	22935569	5757	DEL	ASD	hg19
14	23242430	23249311	6882	DEL	ASD	hg19
14	39762422	39787285	24864	DUP	ASD	hg19
14	45571730	47324359	1752630	DUP	ASD	hg19
14	45617988	45653156	35169	DUP	ASD	hg19
14	45617988	45673417	55430	DUP	ASD	hg19
14	45617988	45673417	55430	DUP	ASD	hg19
14	64407272	64632179	224908	DEL	ASD	hg19
14	64434375	64626211	191837	DEL	ASD	hg19
14	71478136	71500755	22620	DUP	ASD	hg19
14	73572898	73586517	13620	DUP	ASD	hg19
14	73988973	74036589	47617	DUP	ASD	hg19
14	73988973	74036589	47617	DEL	ASD	hg19
14	74004112	74042224	38113	DUP	ASD	hg19
14	74004112	74042224	38113	DUP	ASD	hg19
14	74004112	74042224	38113	DUP	ASD	hg19
14	75489646	75506769	17124	DEL	ASD	hg19
14	81528440	81574848	46409	DUP	ASD	hg19
14	81554208	81574848	20641	DUP	ASD	hg19
14	81554208	81574848	20641	DUP	ASD	hg19
14	89299985	89327727	27743	DUP	ASD	hg19
14	92439009	92499648	60640	DUP	ASD	hg19
14	92439009	92499648	60640	DUP	ASD	hg19
14	92442400	92472843	30444	DUP	ASD	hg19
14	92442400	92477467	35068	DUP	ASD	hg19
14	92442400	92477467	35068	DUP	ASD	hg19
14	92442400	92499648	57249	DUP	ASD	hg19
14	92442400	92499648	57249	DUP	ASD	hg19
14	92454576	92472843	18268	DUP	ASD	hg19
14	92454576	92499648	45073	DUP	ASD	hg19
14	92469711	92499648	29938	DUP	ASD	hg19
14	94699987	94733381	33395	DUP	ASD	hg19
14	95571963	95599065	27103	DEL	ASD	hg19
14	95571963	95599065	27103	DEL	ASD	hg19
14	95573893	95599065	25173	DUP	ASD	hg19
14	95574165	95599065	24901	DEL	ASD	hg19
14	95582738	95598027	15290	DEL	ASD	hg19
14	95590481	95598027	7547	DUP	ASD	hg19
14	96782837	96800840	18004	DEL	ASD	hg19
14	97299757	97322638	22882	DEL	ASD	hg19
14	97299757	97322638	22882	DEL	ASD	hg19
14	97312380	97322638	10259	DEL	ASD	hg19
14	97312380	97327186	14807	DEL	ASD	hg19
14	97312380	97347596	35217	DUP	ASD	hg19
14	99392584	99737635	345052	DUP	ASD	hg19
14	102549308	102551819	2512	DEL	ASD	hg19
14	106306650	106318352	11703	DEL	ASD	hg19
14	106306650	106318352	11703	DEL	ASD	hg19
14	106306650	106318352	11703	DEL	ASD	hg19
14	106329938	106346951	17014	DEL	ASD	hg19
14	106346791	106359459	12669	DEL	ASD	hg19
14	106346791	106359459	12669	DEL	ASD	hg19
14	106349660	106357106	7447	DEL	ASD	hg19
14	106349660	106357106	7447	DEL	ASD	hg19
14	106349660	106357106	7447	DEL	ASD	hg19
14	106349660	106357106	7447	DEL	ASD	hg19
14	106349660	106357106	7447	DEL	ASD	hg19
14	106349660	106357106	7447	DEL	ASD	hg19
14	106349660	106357106	7447	DEL	ASD	hg19
14	106349660	106357106	7447	DEL	ASD	hg19
14	106349660	106357106	7447	DEL	ASD	hg19
14	106350626	106357616	6991	DEL	ASD	hg19
14	106350626	106357616	6991	DEL	ASD	hg19
14	106350626	106357616	6991	DEL	ASD	hg19
14	106350626	106357616	6991	DEL	ASD	hg19
14	106350626	106357616	6991	DEL	ASD	hg19
14	106350626	106357616	6991	DEL	ASD	hg19
14	106350626	106357616	6991	DEL	ASD	hg19
14	106436043	106494604	58562	DUP	ASD	hg19
14	106436043	106494604	58562	DUP	ASD	hg19
14	106452668	106478411	25744	DEL	ASD	hg19
14	106452668	106478411	25744	DEL	ASD	hg19
14	106452668	106478411	25744	DEL	ASD	hg19
14	106452668	106494604	41937	DEL	ASD	hg19
14	106452668	106494604	41937	DEL	ASD	hg19
14	106452668	106494604	41937	DEL	ASD	hg19
14	106452668	106494604	41937	DEL	ASD	hg19
14	106452668	106573537	120870	DEL	ASD	hg19
14	106452668	106573537	120870	DEL	ASD	hg19
14	106452668	106573537	120870	DEL	ASD	hg19
14	106452668	106573537	120870	DEL	ASD	hg19
14	106452668	106573537	120870	DEL	ASD	hg19
14	106471233	106494604	23372	DEL	ASD	hg19
14	106471233	106494604	23372	DEL	ASD	hg19
14	106471233	106494604	23372	DEL	ASD	hg19
14	106471233	106494604	23372	DEL	ASD	hg19
14	106471233	106494604	23372	DEL	ASD	hg19
14	106471233	106494604	23372	DEL	ASD	hg19
14	106471233	106494604	23372	DEL	ASD	hg19
14	106471233	106494604	23372	DEL	ASD	hg19
14	106471233	106494604	23372	DEL	ASD	hg19
14	106471233	106573537	102305	DEL	ASD	hg19
14	106471233	106573537	102305	DEL	ASD	hg19
14	106478096	106518880	40785	DEL	ASD	hg19
14	106478096	106573537	95442	DEL	ASD	hg19
14	106518397	106573537	55141	DEL	ASD	hg19
14	106518726	106573537	54812	DEL	ASD	hg19
14	106963293	107078677	115385	DEL	ASD	hg19
14	106963293	107078677	115385	DEL	ASD	hg19
15	20636293	20657907	21615	DEL	ASD	hg19
15	22368573	22706111	337539	DEL	ASD	hg19
15	22705315	22706828	1514	DEL	ASD	hg19
15	23312114	23412315	100202	DEL	ASD	hg19
15	23312114	23444952	132839	DEL	ASD	hg19
15	23443436	23445194	1759	DEL	ASD	hg19
15	23602362	23608972	6611	DEL	ASD	hg19
15	25584232	25605725	21494	DEL	ASD	hg19
15	25584232	25650700	66469	DEL	ASD	hg19
15	25584232	25650700	66469	DEL	ASD	hg19
15	25599448	25617010	17563	DUP	ASD	hg19
15	25599448	25617010	17563	DUP	ASD	hg19
15	30850094	30852826	2733	DEL	ASD	hg19
15	30850094	30852826	2733	DEL	ASD	hg19
15	30850094	30852826	2733	DEL	ASD	hg19
15	32455364	32685772	230409	DUP	ASD	hg19
15	32684970	32688755	3786	DUP	ASD	hg19
15	32684970	32695296	10327	DEL	ASD	hg19
15	32684970	32738099	53130	DEL	ASD	hg19
15	32685441	32695296	9856	DEL	ASD	hg19
15	32686793	32691057	4265	DEL	ASD	hg19
15	32691357	32695296	3940	DEL	ASD	hg19
15	32691357	32695296	3940	DEL	ASD	hg19
15	32691357	32695296	3940	DEL	ASD	hg19
15	32737766	32740651	2886	DEL	ASD	hg19
15	34542780	34553272	10493	DEL	ASD	hg19
15	40462211	40510814	48604	DEL	ASD	hg19
15	40462211	40510814	48604	DEL	ASD	hg19
15	40462211	40510814	48604	DEL	ASD	hg19
15	40462211	40513011	50801	DEL	ASD	hg19
15	42556285	42568627	12343	DUP	ASD	hg19
15	42850333	42859016	8684	DUP	ASD	hg19
15	43102760	43378489	275730	DEL	ASD	hg19
15	43102760	43378489	275730	DUP	ASD	hg19
15	43256081	43378489	122409	DEL	ASD	hg19
15	43309241	43320077	10837	DUP	ASD	hg19
15	43314848	43320077	5230	DUP	ASD	hg19
15	43346888	43378489	31602	DEL	ASD	hg19
15	44615080	44630525	15446	DUP	ASD	hg19
15	44884477	44944515	60039	DEL	ASD	hg19
15	44884477	44944515	60039	DEL	ASD	hg19
15	44884477	44949545	65069	DEL	ASD	hg19
15	44905576	44921637	16062	DUP	ASD	hg19
15	44905576	44925886	20311	DUP	ASD	hg19
15	44905576	44925886	20311	DUP	ASD	hg19
15	44905576	44925886	20311	DUP	ASD	hg19
15	44905576	44925886	20311	DUP	ASD	hg19
15	44914863	44925886	11024	DUP	ASD	hg19
15	44921379	44944515	23137	DEL	ASD	hg19
15	45656038	45661770	5733	DEL	ASD	hg19
15	45656038	45661770	5733	DEL	ASD	hg19
15	49061101	49085709	24609	DUP	ASD	hg19
15	51204223	51251042	46820	DUP	ASD	hg19
15	51207593	51251042	43450	DUP	ASD	hg19
15	51207593	51251042	43450	DUP	ASD	hg19
15	51217243	51293431	76189	DEL	ASD	hg19
15	51221154	51293431	72278	DEL	ASD	hg19
15	52684075	52702724	18650	DUP	ASD	hg19
15	53994279	54015156	20878	DEL	ASD	hg19
15	53994279	54015156	20878	DEL	ASD	hg19
15	53997133	54007615	10483	DEL	ASD	hg19
15	56680644	56981396	300753	DUP	ASD	hg19
15	58891745	58925609	33865	DEL	ASD	hg19
15	58891745	58936228	44484	DEL	ASD	hg19
15	58891745	58938454	46710	DEL	ASD	hg19
15	58891745	58957447	65703	DEL	ASD	hg19
15	58891745	58971532	79788	DEL	ASD	hg19
15	58891745	59009977	118233	DEL	ASD	hg19
15	58932924	58985324	52401	DEL	ASD	hg19
15	66625071	66639680	14610	DEL	ASD	hg19
15	72954037	72957432	3396	DEL	ASD	hg19
15	72987466	73020386	32921	DUP	ASD	hg19
15	73001989	73020386	18398	DEL	ASD	hg19
15	73001989	73020386	18398	DEL	ASD	hg19
15	76175686	76191847	16162	DUP	ASD	hg19
15	76518138	76576217	58080	DUP	ASD	hg19
15	82635087	82638133	3047	DUP	ASD	hg19
15	84904514	85046656	142143	DEL	ASD	hg19
15	84904514	85046656	142143	DEL	ASD	hg19
15	85785399	85787992	2594	DEL	ASD	hg19
15	89790827	89834996	44170	DEL	ASD	hg19
15	89790827	89847197	56371	DEL	ASD	hg19
15	89790827	89847197	56371	DEL	ASD	hg19
15	89790827	89847197	56371	DEL	ASD	hg19
15	89790827	89857989	67163	DEL	ASD	hg19
15	89804764	89837279	32516	DUP	ASD	hg19
15	89804764	89837279	32516	DUP	ASD	hg19
15	89835867	89850954	15088	DEL	ASD	hg19
15	90248712	90265378	16667	DUP	ASD	hg19
15	91290571	91326209	35639	DEL	ASD	hg19
15	91290571	91347640	57070	DEL	ASD	hg19
15	91290571	91352540	61970	DEL	ASD	hg19
15	102513103	102517829	4727	DUP	ASD	hg19
15	102513103	102519011	5909	DUP	ASD	hg19
15	102514036	102519011	4976	DEL	ASD	hg19
16	64379	68264	3886	DEL	ASD	hg19
16	64379	68264	3886	DEL	ASD	hg19
16	64379	68264	3886	DEL	ASD	hg19
16	64379	68264	3886	DEL	ASD	hg19
16	64379	68264	3886	DEL	ASD	hg19
16	64379	68264	3886	DEL	ASD	hg19
16	1887777	1918191	30415	DUP	ASD	hg19
16	8992205	8994489	2285	DUP	ASD	hg19
16	10524475	10574828	50354	DUP	ASD	hg19
16	10534218	10567863	33646	DUP	ASD	hg19
16	11827776	11980788	153013	DEL	ASD	hg19
16	11870604	11980788	110185	DEL	ASD	hg19
16	14015836	14026200	10365	DEL	ASD	hg19
16	14015836	14028210	12375	DUP	ASD	hg19
16	14015836	14031766	15931	DEL	ASD	hg19
16	14015836	14031766	15931	DEL	ASD	hg19
16	14649488	14702997	53510	DUP	ASD	hg19
16	14697941	14722118	24178	DEL	ASD	hg19
16	15098041	15111051	13011	DEL	ASD	hg19
16	16442541	16466402	23862	DEL	ASD	hg19
16	16442541	16466402	23862	DEL	ASD	hg19
16	16442541	16466402	23862	DEL	ASD	hg19
16	16442541	16466402	23862	DEL	ASD	hg19
16	16442541	16466402	23862	DEL	ASD	hg19
16	16465250	16468396	3147	DEL	ASD	hg19
16	18431221	18434404	3184	DEL	ASD	hg19
16	18431221	18434404	3184	DEL	ASD	hg19
16	18431221	18434404	3184	DEL	ASD	hg19
16	18431221	18434404	3184	DEL	ASD	hg19
16	18431221	18434404	3184	DUP	ASD	hg19
16	18431221	18434404	3184	DEL	ASD	hg19
16	18431221	18434404	3184	DEL	ASD	hg19
16	18431221	18434404	3184	DEL	ASD	hg19
16	18870342	18902263	31922	DUP	ASD	hg19
16	19509231	19559929	50699	DEL	ASD	hg19
16	20792967	20839861	46895	DEL	ASD	hg19
16	20792967	20843583	50617	DEL	ASD	hg19
16	20800790	20812683	11894	DUP	ASD	hg19
16	20807689	20812683	4995	DUP	ASD	hg19
16	23625273	23640647	15375	DEL	ASD	hg19
16	23625273	23640647	15375	DEL	ASD	hg19
16	23625273	23640647	15375	DEL	ASD	hg19
16	23625273	23649324	24052	DEL	ASD	hg19
16	23625273	23649324	24052	DUP	ASD	hg19
16	23625273	23649501	24229	DEL	ASD	hg19
16	23625273	23649501	24229	DUP	ASD	hg19
16	23634238	23649324	15087	DUP	ASD	hg19
16	24557421	24571000	13580	DUP	ASD	hg19
16	28617088	28659638	42551	DUP	ASD	hg19
16	29053510	29062060	8551	DEL	ASD	hg19
16	29057278	29064053	6776	DEL	ASD	hg19
16	29057278	29064053	6776	DEL	ASD	hg19
16	29057278	29088136	30859	DEL	ASD	hg19
16	29057278	29088136	30859	DEL	ASD	hg19
16	29087976	29102220	14245	DUP	ASD	hg19
16	29105558	29115489	9932	DEL	ASD	hg19
16	31733875	31770825	36951	DEL	ASD	hg19
16	31733875	31927804	193930	DEL	ASD	hg19
16	31734517	31770825	36309	DEL	ASD	hg19
16	31734517	31770825	36309	DEL	ASD	hg19
16	31734517	31770825	36309	DEL	ASD	hg19
16	31734517	31770825	36309	DEL	ASD	hg19
16	31744791	31804051	59261	DUP	ASD	hg19
16	31744791	31804051	59261	DUP	ASD	hg19
16	31744791	31804051	59261	DUP	ASD	hg19
16	32077385	32265042	187658	DEL	ASD	hg19
16	34681343	46532163	11850821	DEL	ASD	hg19
16	34681343	46532163	11850821	DEL	ASD	hg19
16	34681343	46534801	11853459	DUP	ASD	hg19
16	34681343	46617615	11936273	DUP	ASD	hg19
16	34681343	46617615	11936273	DUP	ASD	hg19
16	34681343	46617615	11936273	DUP	ASD	hg19
16	34681343	46617615	11936273	DUP	ASD	hg19
16	34681343	46716138	12034796	DUP	ASD	hg19
16	46509677	46534801	25125	DUP	ASD	hg19
16	46706125	46716138	10014	DUP	ASD	hg19
16	46706125	46716138	10014	DUP	ASD	hg19
16	46706125	46716138	10014	DUP	ASD	hg19
16	46706125	46716138	10014	DUP	ASD	hg19
16	46706125	46716138	10014	DUP	ASD	hg19
16	46706125	46716138	10014	DUP	ASD	hg19
16	47189609	47732550	542942	DUP	ASD	hg19
16	47409709	47628176	218468	DUP	ASD	hg19
16	47409709	47694781	285073	DUP	ASD	hg19
16	47409709	47733328	323620	DUP	ASD	hg19
16	47531258	47697696	166439	DEL	ASD	hg19
16	47531258	47732550	201293	DEL	ASD	hg19
16	50783558	50826667	43110	DUP	ASD	hg19
16	50818188	50826667	8480	DUP	ASD	hg19
16	50818188	50826667	8480	DUP	ASD	hg19
16	50818188	50826667	8480	DUP	ASD	hg19
16	53644827	53844180	199354	DUP	ASD	hg19
16	53644827	53878261	233435	DUP	ASD	hg19
16	53644827	53878261	233435	DUP	ASD	hg19
16	53670299	53692427	22129	DUP	ASD	hg19
16	53670299	53721928	51630	DUP	ASD	hg19
16	53670299	53721928	51630	DUP	ASD	hg19
16	53670299	53721928	51630	DUP	ASD	hg19
16	53670299	53721928	51630	DUP	ASD	hg19
16	53670299	53729370	59072	DEL	ASD	hg19
16	53670299	53913950	243652	DEL	ASD	hg19
16	55565753	55579738	13986	DUP	ASD	hg19
16	55866861	55886942	20082	DEL	ASD	hg19
16	56485522	56496548	11027	DEL	ASD	hg19
16	56487172	56544884	57713	DEL	ASD	hg19
16	56487172	56545247	58076	DEL	ASD	hg19
16	56487172	56548633	61462	DEL	ASD	hg19
16	56487172	56548633	61462	DEL	ASD	hg19
16	56496443	56548633	52191	DEL	ASD	hg19
16	57241946	57250102	8157	DUP	ASD	hg19
16	58580222	58585178	4957	DEL	ASD	hg19
16	58580222	58585178	4957	DEL	ASD	hg19
16	66801256	66811237	9982	DUP	ASD	hg19
16	66801256	66851392	50137	DUP	ASD	hg19
16	66801256	66858817	57562	DUP	ASD	hg19
16	70010278	70020412	10135	DUP	ASD	hg19
16	70010278	70030091	19814	DUP	ASD	hg19
16	70187292	70208996	21705	DEL	ASD	hg19
16	71792708	71799582	6875	DUP	ASD	hg19
16	71792708	71801833	9126	DUP	ASD	hg19
16	71792708	71801833	9126	DUP	ASD	hg19
16	74387674	74455170	67497	DUP	ASD	hg19
16	74415412	74425989	10578	DUP	ASD	hg19
16	74425286	74455170	29885	DEL	ASD	hg19
16	74443443	74445675	2233	DUP	ASD	hg19
16	74445867	74455170	9304	DEL	ASD	hg19
16	76481907	76574693	92787	DEL	ASD	hg19
16	77331134	77390025	58892	DEL	ASD	hg19
16	78142268	78312604	170337	DUP	ASD	hg19
16	81050858	81058401	7544	DUP	ASD	hg19
16	81094763	81121320	26558	DUP	ASD	hg19
16	81097348	81124336	26989	DEL	ASD	hg19
16	81097348	81124336	26989	DEL	ASD	hg19
16	81097348	81124336	26989	DUP	ASD	hg19
16	81097348	81124336	26989	DEL	ASD	hg19
16	81097348	81124336	26989	DUP	ASD	hg19
16	81097348	81124336	26989	DUP	ASD	hg19
16	81097348	81124336	26989	DUP	ASD	hg19
16	81097348	81124336	26989	DUP	ASD	hg19
16	81097348	81124336	26989	DUP	ASD	hg19
16	81097348	81124336	26989	DUP	ASD	hg19
16	81097348	81124336	26989	DUP	ASD	hg19
16	81272462	81348936	76475	DEL	ASD	hg19
16	81385136	81397599	12464	DEL	ASD	hg19
16	81385136	81397599	12464	DUP	ASD	hg19
16	81385136	81397599	12464	DUP	ASD	hg19
16	81385136	81397599	12464	DUP	ASD	hg19
16	81385136	81397599	12464	DUP	ASD	hg19
16	81385136	81397599	12464	DUP	ASD	hg19
16	82182333	82197801	15469	DUP	ASD	hg19
16	82891965	83205198	313234	DEL	ASD	hg19
16	84182560	84193452	10893	DEL	ASD	hg19
16	84182560	84193452	10893	DEL	ASD	hg19
16	84182560	84193452	10893	DEL	ASD	hg19
17	2380977	2569435	188459	DUP	ASD	hg19
17	2380977	2569435	188459	DUP	ASD	hg19
17	3346465	3397794	51330	DUP	ASD	hg19
17	3346465	3397794	51330	DUP	ASD	hg19
17	3349723	3392687	42965	DUP	ASD	hg19
17	3349723	3397794	48072	DUP	ASD	hg19
17	3352098	3402433	50336	DEL	ASD	hg19
17	3370677	3392687	22011	DUP	ASD	hg19
17	3370677	3397794	27118	DUP	ASD	hg19
17	3379402	3397794	18393	DEL	ASD	hg19
17	3379402	3397794	18393	DEL	ASD	hg19
17	3379402	3397794	18393	DEL	ASD	hg19
17	3379402	3397794	18393	DUP	ASD	hg19
17	5044647	5052064	7418	DUP	ASD	hg19
17	5045689	5050491	4803	DEL	ASD	hg19
17	5045689	5064916	19228	DEL	ASD	hg19
17	5045689	5064916	19228	DEL	ASD	hg19
17	5048697	5058903	10207	DEL	ASD	hg19
17	5383369	5388553	5185	DUP	ASD	hg19
17	6545556	6553764	8209	DUP	ASD	hg19
17	10267642	10319076	51435	DEL	ASD	hg19
17	10584384	10618907	34524	DEL	ASD	hg19
17	15441403	15458687	17285	DEL	ASD	hg19
17	16596217	16676947	80731	DUP	ASD	hg19
17	16596217	16676947	80731	DUP	ASD	hg19
17	16596217	16692728	96512	DUP	ASD	hg19
17	16596217	16734607	138391	DUP	ASD	hg19
17	16610711	16665914	55204	DEL	ASD	hg19
17	16610711	16667558	56848	DEL	ASD	hg19
17	16610711	16667558	56848	DEL	ASD	hg19
17	16610711	16667558	56848	DEL	ASD	hg19
17	16610711	16734607	123897	DEL	ASD	hg19
17	16612108	16676071	63964	DEL	ASD	hg19
17	16630768	16676947	46180	DUP	ASD	hg19
17	16635800	16735705	99906	DUP	ASD	hg19
17	16638002	16667558	29557	DEL	ASD	hg19
17	16638002	16667558	29557	DEL	ASD	hg19
17	16638002	16667558	29557	DEL	ASD	hg19
17	16638002	16676071	38070	DUP	ASD	hg19
17	16664736	16692728	27993	DUP	ASD	hg19
17	16667277	16692728	25452	DUP	ASD	hg19
17	16734451	16843162	108712	DEL	ASD	hg19
17	16735007	16745709	10703	DEL	ASD	hg19
17	16735007	16745709	10703	DEL	ASD	hg19
17	18330228	18333158	2931	DEL	ASD	hg19
17	18330228	18333158	2931	DEL	ASD	hg19
17	18330228	18333158	2931	DEL	ASD	hg19
17	18330228	18333158	2931	DEL	ASD	hg19
17	18330228	18333158	2931	DEL	ASD	hg19
17	18330228	18333158	2931	DEL	ASD	hg19
17	18330228	18333158	2931	DEL	ASD	hg19
17	18330228	18333158	2931	DEL	ASD	hg19
17	18330228	18389514	59287	DUP	ASD	hg19
17	18330228	18392352	62125	DUP	ASD	hg19
17	18330228	18430117	99890	DEL	ASD	hg19
17	18330228	18430117	99890	DEL	ASD	hg19
17	18330228	18430117	99890	DUP	ASD	hg19
17	18333619	18430117	96499	DEL	ASD	hg19
17	18486751	18525897	39147	DUP	ASD	hg19
17	18486751	18525897	39147	DUP	ASD	hg19
17	18983268	18997166	13899	DEL	ASD	hg19
17	19555808	19566863	11056	DEL	ASD	hg19
17	19555808	19566863	11056	DEL	ASD	hg19
17	19720059	19744881	24823	DUP	ASD	hg19
17	19729425	19813315	83891	DUP	ASD	hg19
17	20227420	20297544	70125	DUP	ASD	hg19
17	20227420	20305434	78015	DUP	ASD	hg19
17	20227420	20305434	78015	DUP	ASD	hg19
17	20227420	20305434	78015	DUP	ASD	hg19
17	20239132	20297544	58413	DEL	ASD	hg19
17	20239132	20297544	58413	DEL	ASD	hg19
17	20239132	20297544	58413	DEL	ASD	hg19
17	20239132	20304609	65478	DUP	ASD	hg19
17	20242791	20295897	53107	DEL	ASD	hg19
17	20268397	20305434	37038	DUP	ASD	hg19
17	20355044	20358772	3729	DEL	ASD	hg19
17	20355044	20358772	3729	DEL	ASD	hg19
17	20355044	20358772	3729	DEL	ASD	hg19
17	20355044	20358772	3729	DEL	ASD	hg19
17	20355044	20358772	3729	DEL	ASD	hg19
17	20355044	20358772	3729	DEL	ASD	hg19
17	20355044	20358772	3729	DUP	ASD	hg19
17	20355044	20358772	3729	DEL	ASD	hg19
17	20355044	20358772	3729	DEL	ASD	hg19
17	25630390	25636300	5911	DEL	ASD	hg19
17	27802685	27816778	14094	DUP	ASD	hg19
17	27804596	27816778	12183	DUP	ASD	hg19
17	27822575	27838025	15451	DEL	ASD	hg19
17	28407088	28435050	27963	DEL	ASD	hg19
17	28712004	28782534	70531	DEL	ASD	hg19
17	28712004	28811970	99967	DEL	ASD	hg19
17	28749689	28766150	16462	DEL	ASD	hg19
17	29161163	29221942	60780	DUP	ASD	hg19
17	29482949	29508844	25896	DUP	ASD	hg19
17	29482949	29550636	67688	DUP	ASD	hg19
17	29482949	29557994	75046	DUP	ASD	hg19
17	29482949	29687772	204824	DUP	ASD	hg19
17	29482949	29687772	204824	DUP	ASD	hg19
17	29509474	29694319	184846	DEL	ASD	hg19
17	29528003	29687772	159770	DEL	ASD	hg19
17	29554489	29557994	3506	DEL	ASD	hg19
17	29554489	29687772	133284	DEL	ASD	hg19
17	29559039	29685691	126653	DEL	ASD	hg19
17	30302498	30362014	59517	DEL	ASD	hg19
17	30315336	30362014	46679	DEL	ASD	hg19
17	30320881	30358487	37607	DEL	ASD	hg19
17	30322580	30362661	40082	DUP	ASD	hg19
17	30322580	30362661	40082	DUP	ASD	hg19
17	33267495	33281642	14148	DUP	ASD	hg19
17	33687219	33849398	162180	DEL	ASD	hg19
17	33687219	33849398	162180	DEL	ASD	hg19
17	34587195	34590468	3274	DEL	ASD	hg19
17	34587195	34590468	3274	DEL	ASD	hg19
17	34587195	34590468	3274	DEL	ASD	hg19
17	34587195	34590468	3274	DEL	ASD	hg19
17	34587195	34590468	3274	DEL	ASD	hg19
17	34587195	34590468	3274	DEL	ASD	hg19
17	34587195	34590468	3274	DEL	ASD	hg19
17	34587195	34590468	3274	DEL	ASD	hg19
17	34587195	34590468	3274	DEL	ASD	hg19
17	34587195	34590468	3274	DEL	ASD	hg19
17	34587195	34590468	3274	DEL	ASD	hg19
17	34587195	34590468	3274	DEL	ASD	hg19
17	34587195	34590468	3274	DEL	ASD	hg19
17	34587195	34590468	3274	DEL	ASD	hg19
17	34587195	34590468	3274	DEL	ASD	hg19
17	34587195	34590468	3274	DEL	ASD	hg19
17	34587195	34590468	3274	DEL	ASD	hg19
17	34587195	34590468	3274	DEL	ASD	hg19
17	34587195	34590468	3274	DEL	ASD	hg19
17	34587195	34624405	37211	DEL	ASD	hg19
17	34587195	34641543	54349	DEL	ASD	hg19
17	34587195	34641543	54349	DEL	ASD	hg19
17	35348010	35800765	452756	DEL	ASD	hg19
17	37093425	37101391	7967	DEL	ASD	hg19
17	37093425	37101391	7967	DEL	ASD	hg19
17	37093425	37119280	25856	DEL	ASD	hg19
17	37579577	37657694	78118	DEL	ASD	hg19
17	37579577	37672072	92496	DEL	ASD	hg19
17	38450150	38458304	8155	DEL	ASD	hg19
17	38450564	38458304	7741	DEL	ASD	hg19
17	38450564	38458304	7741	DEL	ASD	hg19
17	38548291	38572768	24478	DUP	ASD	hg19
17	38555023	38560525	5503	DEL	ASD	hg19
17	38954484	38975464	20981	DUP	ASD	hg19
17	39221708	39262273	40566	DEL	ASD	hg19
17	39240457	39274567	34111	DEL	ASD	hg19
17	39240457	39274567	34111	DUP	ASD	hg19
17	39240457	39274567	34111	DEL	ASD	hg19
17	39240457	39274567	34111	DEL	ASD	hg19
17	39240457	39274567	34111	DEL	ASD	hg19
17	39240457	39274567	34111	DEL	ASD	hg19
17	39240457	39274567	34111	DEL	ASD	hg19
17	39240457	39274567	34111	DEL	ASD	hg19
17	39240457	39274567	34111	DEL	ASD	hg19
17	39240457	39274567	34111	DUP	ASD	hg19
17	39240457	39274567	34111	DEL	ASD	hg19
17	39240457	39274567	34111	DEL	ASD	hg19
17	39240457	39274567	34111	DEL	ASD	hg19
17	39240457	39274567	34111	DEL	ASD	hg19
17	39240457	39274567	34111	DEL	ASD	hg19
17	39240457	39274567	34111	DEL	ASD	hg19
17	39240457	39274567	34111	DEL	ASD	hg19
17	39240457	39274567	34111	DEL	ASD	hg19
17	39240457	39274567	34111	DEL	ASD	hg19
17	39240457	39274567	34111	DEL	ASD	hg19
17	39240457	39274567	34111	DEL	ASD	hg19
17	39240457	39274567	34111	DEL	ASD	hg19
17	39240457	39274567	34111	DEL	ASD	hg19
17	39240457	39274567	34111	DEL	ASD	hg19
17	39240457	39274567	34111	DEL	ASD	hg19
17	39240457	39274567	34111	DEL	ASD	hg19
17	39240457	39274567	34111	DEL	ASD	hg19
17	39253777	39280376	26600	DEL	ASD	hg19
17	39253777	39280376	26600	DEL	ASD	hg19
17	39253777	39280376	26600	DEL	ASD	hg19
17	39723473	39726523	3051	DEL	ASD	hg19
17	40354723	40369533	14811	DEL	ASD	hg19
17	40642502	40652943	10442	DEL	ASD	hg19
17	40871120	40904953	33834	DEL	ASD	hg19
17	41196310	41257024	60715	DEL	ASD	hg19
17	41215298	41257024	41727	DEL	ASD	hg19
17	41215298	41276164	60867	DEL	ASD	hg19
17	41215298	41332868	117571	DUP	ASD	hg19
17	41215839	41276164	60326	DEL	ASD	hg19
17	41215839	41276164	60326	DEL	ASD	hg19
17	41226296	41256329	30034	DEL	ASD	hg19
17	41243347	41276164	32818	DUP	ASD	hg19
17	41243347	41276164	32818	DUP	ASD	hg19
17	41243347	41276164	32818	DUP	ASD	hg19
17	41249209	41276164	26956	DUP	ASD	hg19
17	42472643	42761333	288691	DEL	ASD	hg19
17	42501665	42761333	259669	DEL	ASD	hg19
17	43506851	44249519	742669	DEL	ASD	hg19
17	43506851	44249519	742669	DEL	ASD	hg19
17	43580613	44111694	531082	DEL	ASD	hg19
17	43580613	44111694	531082	DEL	ASD	hg19
17	43580613	44111694	531082	DEL	ASD	hg19
17	44388500	44413038	24539	DUP	ASD	hg19
17	44400245	44415168	14924	DUP	ASD	hg19
17	44407749	44415168	7420	DEL	ASD	hg19
17	44407749	44415168	7420	DEL	ASD	hg19
17	44407749	44415168	7420	DEL	ASD	hg19
17	44407749	44415168	7420	DEL	ASD	hg19
17	44407749	44415168	7420	DEL	ASD	hg19
17	44407749	44415168	7420	DEL	ASD	hg19
17	44407749	44415168	7420	DEL	ASD	hg19
17	44407749	44415168	7420	DEL	ASD	hg19
17	44407749	44415168	7420	DEL	ASD	hg19
17	44407749	44415168	7420	DEL	ASD	hg19
17	44407749	44415168	7420	DEL	ASD	hg19
17	44407749	44415168	7420	DEL	ASD	hg19
17	44407749	44415168	7420	DEL	ASD	hg19
17	44407749	44415168	7420	DEL	ASD	hg19
17	44407749	44415168	7420	DEL	ASD	hg19
17	44407749	44415168	7420	DEL	ASD	hg19
17	44407749	44415168	7420	DEL	ASD	hg19
[truncated: 2,993 more rows]
