# Supplementary material for: A Study of the Genomic Variations Associated with Autistic Spectrum Disorders in a Russian Cohort of Patients Using Whole-Exome Sequencing
Source: Genes (Basel). 2022 May 20;13(5):920. doi: 10.3390/genes13050920 (PMC9141003; doi:10.3390/genes13050920)
Supplement: Supplementary file 1 [file genes-13-00920-s001.zip › Table S4.xlsx]

## Sheet: S4 Table
Table S4.	The distribution of common ASD-associated SNPs in the studied ASD and nonASD cohorts,
	as per the results of an intersection analysis with relevant data sets from the AutDB repository.
SNP	CHR	Position (hg19)	ALLELE1	CASE_AF	CONTROL_AF	ALLELE2	P	OR
rs1801131	1	11854476	G	0.3264	0.3627	T	0.4818	0.8514
rs1801133	1	11856378	A	0.3031	0.2647	G	0.5417	1.208
rs2501432	1	24201920	T	0.3653	0.3824	C	0.8176	0.9297
rs6537825	1	114948281	A	0.07513	0.1078	G	0.31	0.672
rs6339	1	156848946	T	0.04922	0.05882	G	0.6226	0.8283
rs6337	1	156848995	C	0.3187	0.2353	T	0.1152	1.52
rs1130183	1	160011512	A	0.1036	0.1176	G	0.7184	0.8671
rs35369693	1	206224635	C	0.0544	NA	G	1	NA
rs28632197	1	206230958	A	0.1244	NA	G	1	NA
rs6675281	1	231954101	T	0.1658	0.2059	C	0.3784	0.7666
rs821616	1	232144598	T	0.2694	0.3039	A	0.534	0.8447
rs3748989	2	1946968	T	0.08549	0.04902	C	0.299	1.814
rs523349	2	31805706	G	0.342	0.3627	C	0.7261	0.913
rs2303298	2	50850686	A	0.01302	0.01961	G	0.641	0.6596
rs1045874	2	51254901	A	0.04663	0.1373	G	0.002566	0.3075
rs11541353	2	101594191	T	0.1943	0.1176	C	0.08113	1.809
rs17727261	2	125281910	T	0.05181	0.04902	C	1	1.06
rs34995577	2	149221327	A	0.002591	0	G	1	NA
rs2229267	2	170092395	G	0.2772	0.3627	A	0.1121	0.6737
rs830973	2	170096018	A	0.3219	NA	G	1	NA
rs831041	2	170099446	G	0.4589	NA	T	1	NA
rs831042	2	170099473	T	0.513	0.4412	C	0.2211	1.334
rs2075255	2	170099895	C	0.4726	NA	A	1	NA
rs2075254	2	170099899	A	0.4589	NA	G	1	NA
rs831043	2	170103336	T	0.5078	0.4118	C	0.09505	1.474
rs2075249	2	170103351	T	0.4767	0.5294	G	0.3737	0.8097
rs2241190	2	170115588	T	0.4896	0.4216	C	0.2649	1.316
rs2056202	2	172712480	T	0.1597	NA	C	1	NA
rs1143674	2	182374534	A	0.3639	0.4118	G	0.4203	0.8172
rs4656	2	191224981	T	0.3083	0.2157	G	0.08501	1.621
rs849563	2	206610502	G	0.1554	0.1275	T	0.5357	1.26
rs1063639	2	240003870	A	0.4819	0.5392	G	0.318	0.7947
rs3749380	3	6903297	T	0.3627	0.4804	C	0.03932	0.6156
rs237902	3	8809184	A	0.3083	0.2353	G	0.1785	1.449
rs4686302	3	8809222	T	0.1969	0.2157	C	0.678	0.8915
rs35678	3	10379923	T	0.4145	0.4608	C	0.4311	0.8285
rs241509	3	10387059	A	0.411	NA	C	1	NA
rs140696	3	129152089	A	0.08073	0.05882	G	0.5351	1.405
rs2307298	3	129155414	G	0.01302	0	A	0.5886	NA
rs140693	3	129155451	T	0.01295	0.009804	C	1	1.325
rs2307289	3	129155463	G	0.002591	0	A	1	NA
rs10342	3	129155670	T	0.07254	0.05882	C	0.827	1.251
rs140692	3	129156536	G	0.0411	NA	A	1	NA
rs6766410	3	183774762	A	0.399	0.402	C	1	0.9876
rs6807362	3	183778010	C	0.4663	0.4804	G	0.8241	0.9451
rs4482737	4	47322190	T	0.01554	0.009804	C	1	1.595
rs25925	5	110819753	G	0.1979	0.1765	C	0.6746	1.152
rs1804197	5	112179909	A	0.0125	NA	C	1	NA
rs1131611	5	134364996	T	0.08031	0.1176	G	0.2412	0.6549
rs1042713	5	148206440	A	0.3731	0.4314	G	0.304	0.7844
rs1042714	5	148206473	G	0.4404	0.3431	C	0.09056	1.507
rs2241694	5	149602608	A	0.06218	0.07843	G	0.508	0.779
rs4746	6	38650628	G	0.4036	0.4118	T	0.9099	0.9669
rs1049346	6	38670837	A	0.4932	NA	G	1	NA
rs9349688	6	53762092	G	0.1016	0.1373	A	0.2894	0.7106
rs1049353	6	88853635	T	0.2617	0.3137	C	0.3177	0.7752
rs2227283	6	102503317	A	0.4223	0.5098	G	0.1179	0.7028
rs2235076	6	102516260	A	0.02073	0.01	G	0.6932	2.095
rs2279382	6	123101373	G	0.1233	NA	T	1	NA
rs9494209	6	135606755	G	0.04795	NA	C	1	NA
rs6923492	6	146755324	C	0.4715	0.4412	T	0.6555	1.13
rs10951154	7	27135314	C	0.1761	0.17	T	1	1.044
rs2293507	7	70228020	T	0.03109	0.009804	G	0.319	3.241
rs2228607	7	73122923	A	0.4637	NA	G	1	NA
rs662	7	94937446	C	0.2591	0.2157	T	0.4406	1.271
rs854560	7	94946084	T	0.3575	0.402	A	0.4204	0.8279
rs2229864	7	103155705	G	0.4145	0.3627	A	0.3657	1.244
rs362691	7	103251161	C	0.1269	0.06863	G	0.1167	1.973
rs1129293	7	106513011	T	0.3212	0.3431	C	0.7218	0.906
rs1269621	7	107849908	G	0.4319	0.4902	A	0.3138	0.7908
rs3735270	7	124387092	G	0.4611	0.5392	C	0.1814	0.7313
rs724356	7	124387374	A	0.2772	0.2745	G	1	1.014
rs61744942	7	124404371	A	0.09845	0.1176	G	0.5828	0.819
rs62638681	7	124404983	G	0.05181	0.05882	A	0.8045	0.8743
rs12539800	7	129479138	C	0.06218	0.06863	T	0.8201	0.8998
rs3779031	7	147926734	G	0.1438	NA	A	1	NA
rs2301963	8	1514009	A	0.4726	0.3529	C	0.06817	1.643
rs4541	8	143956693	A	0.04167	NA	G	1	NA
rs2296212	9	2191309	G	0.1503	0.04902	C	0.004674	3.43
rs301430	9	4576680	C	0.3264	0.3529	T	0.6371	0.8885
rs2240953	9	131110892	A	0.03627	0.05882	G	0.3965	0.6022
rs807023	10	102770082	T	0.1943	0.1078	G	0.04157	1.995
rs41258054	11	534197	T	0.0137	NA	C	1	NA
rs12628	11	534242	G	0.3356	0.2745	A	0.3313	1.335
rs41294870	11	534332	A	0.0411	NA	G	1	NA
rs12273892	11	64480930	T	0.1684	0.2157	A	0.3082	0.7363
rs1805247	12	13715975	G	0.09326	0.1078	A	0.7058	0.8509
rs1806201	12	13717508	A	0.3394	0.2941	G	0.4096	1.233
rs1805522	12	13761741	A	0.05181	0.08824	G	0.1641	0.5647
rs1805482	12	13764774	A	0.2487	0.1961	G	0.2972	1.357
rs7301328	12	14018777	C	0.4171	0.3627	G	0.3648	1.257
rs34315573	12	14019128	T	0.03368	0.05882	C	0.252	0.5576
rs731236	12	48238757	G	0.3782	0.3333	A	0.4217	1.217
rs7975232	12	48238837	A	0.5	NA	C	1	NA
rs2228570	12	48272895	A	0.4378	0.4804	G	0.5018	0.8424
rs1042615	12	63544209	A	0.3497	0.402	G	0.3544	0.8002
rs7397862	12	66814487	C	0.3288	NA	A	1	NA
rs7305115	12	72372862	A	0.3912	0.3627	G	0.648	1.129
rs6314	13	47409034	A	0.05729	0.05882	G	1	0.9724
rs6313	13	47469940	A	0.3653	0.3431	G	0.7287	1.102
rs7170637	15	22969232	A	0.1096	0.1078	G	1	1.018
rs1047700	15	25924539	C	0.1606	0.1471	T	0.8787	1.11
rs20318	15	27018797	A	0.1477	0.1569	G	0.876	0.9312
rs25409	15	27018841	A	0.01036	0	G	0.5844	NA
rs140674	15	27573968	C	0.01295	0	T	0.5889	NA
rs2229364	15	39879717	A	0.1088	0.07843	G	0.4638	1.435
rs2292305	15	39880822	G	0.1088	0.06863	A	0.2701	1.657
rs130008	16	3781952	G	0.02055	NA	C	1	NA
rs3025684	16	3795363	A	0.02055	NA	G	1	NA
rs886528	16	3811556	G	0.4068	0.3627	A	0.5789	1.205
rs130025	16	3832959	A	0.0137	NA	C	1	NA
rs1731017	16	8839954	A	0.3653	0.4216	G	0.3034	0.7897
rs117448844	16	29899021	T	0.006849	0	C	1	NA
rs4150167	16	84213684	T	0.03109	0	C	0.08028	NA
rs1060826	17	26089867	T	0.3497	0.3431	C	1	1.03
rs2779251	17	26131326	A	0.1625	0.2157	G	0.2798	0.7056
rs111902263	17	29298435	A	0.006849	0.009804	G	1	0.6966
rs34516580	17	40086986	T	0.04145	NA	C	1	NA
rs3809878	17	40094835	T	0.1658	NA	C	1	NA
rs5918	17	45360730	C	0.1477	0.1471	T	1	1.005
rs4343	17	61566031	A	0.4689	0.5392	G	0.2215	0.7545
rs594445	18	33831189	A	0.2694	0.2059	C	0.2046	1.422
rs125555	18	47800179	C	0.2073	0.1961	G	0.8906	1.072
rs140686	18	47803354	T	0.1088	0.06863	C	0.2701	1.657
rs948615	18	72345890	C	0.09845	0.1471	A	0.2088	0.6333
rs3746599	20	30437522	G	0.411	NA	A	1	NA
rs73598374	20	43280227	T	0.06736	0.01961	C	0.09047	3.611
rs2234694	21	33038865	C	0.03425	NA	A	1	NA
rs2837029	21	40800371	T	0.2005	0.1863	C	0.8888	1.096
rs9616915	22	51117580	C	0.5	0.4706	T	0.6563	1.125
rs1557620	22	51137249	T	0.2329	NA	C	1	NA
rs61729471	22	51153371	A	0.05959	0.03922	G	0.6257	1.552
rs7049300	23	5821786	A	0.06995	0.1765	G	0.001898	0.351
rs1800273	23	31986607	A	0.04167	0.04902	G	0.7841	0.8435
rs6323	23	43591036	G	0.3187	0.3922	T	0.1939	0.7249
rs6324	23	43626815	A	0	0.01961	G	0.1682	0
rs5905724	23	49087487	A	0.4296	NA	G	1	NA
rs6152	23	66765627	A	0.1554	0.1863	G	0.4521	0.804
