# Supplementary material for: A Study of the Genomic Variations Associated with Autistic Spectrum Disorders in a Russian Cohort of Patients Using Whole-Exome Sequencing
Source: Genes (Basel). 2022 May 20;13(5):920. doi: 10.3390/genes13050920 (PMC9141003; doi:10.3390/genes13050920)
Supplement: Supplementary file 1 [file genes-13-00920-s001.zip › Table S5.xlsx]

## Sheet: S5 Table
Table S5.	Common ASD-associated CNVs detected in the studied cohorts, as per the results of an intersection analysis with relevant data sets from the AutDB repository
Sample ID	CNV ID	Chromosome Band	Gene content	CNV type	Reference
R0013	CNV_1	11q11	OR4C11;OR4C15;OR4C16;OR4P4;OR4S2	Deletion	Girirajan S , et al. 2011
R0072	CNV_1	11q11	OR4C11;OR4C16;OR4C6;OR4P4;OR4S2	Deletion
R0219	CNV_1	11q11	OR4C11;OR4C16;OR4C6;OR4P4;OR4S2	Deletion
R0276	CNV_1	11q11	OR4C11;OR4C15;OR4C16;OR4P4;OR4S2	Deletion
R0327	CNV_1	11q11	OR4C11;OR4C15;OR4C16;OR4P4;OR4S2	Deletion
R0478	CNV_1	11q11	OR4C11;OR4C15;OR4C16;OR4P4;OR4S2	Deletion
R0512	CNV_1	11q11	OR4C11;OR4C15;OR4C16;OR4P4;OR4S2	Deletion
R0525	CNV_1	11q11	OR4C11;OR4C15;OR4C16;OR4P4;OR4S2	Deletion
R0542	CNV_1	11q11	OR4C11;OR4C15;OR4C16;OR4P4;OR4S2	Deletion
S08	CNV_1	11q11	OR4C11;OR4C15;OR4C16;OR4P4;OR4S2	Deletion
S21	CNV_1	11q11	OR4C11;OR4C16;OR4C6;OR4P4;OR4S2	Deletion
S42	CNV_1	11q11	OR4C11;OR4C15;OR4C16;OR4P4;OR4S2	Deletion
R0238	CNV_2	13q12.11	SKA3	Duplication	Krumm N , et al. 2015
R0319	CNV_2	13q12.11	SKA3	Duplication
R0370	CNV_2	13q12.11	SKA3	Duplication
R0387	CNV_2	13q12.11	SKA3	Duplication
R0394	CNV_2	13q12.11	SKA3	Duplication
R0400	CNV_2	13q12.11	SKA3	Duplication
R0408	CNV_2	13q12.11	SKA3	Duplication
R0414	CNV_2	13q12.11	SKA3	Duplication
R0423	CNV_2	13q12.11	SKA3	Duplication
R0449	CNV_2	13q12.11	SKA3	Duplication
R0464	CNV_2	13q12.11	SKA3	Duplication
R0542	CNV_2	13q12.11	SKA3	Duplication
R0608	CNV_2	13q12.11	SKA3	Duplication
R0614	CNV_2	13q12.11	SKA3	Duplication
S01	CNV_2	13q12.11	SKA3	Duplication
S02	CNV_2	13q12.11	SKA3	Duplication
S05	CNV_2	13q12.11	SKA3	Duplication
S08	CNV_2	13q12.11	SKA3	Duplication
S33	CNV_2	13q12.11	SKA3	Duplication
S36	CNV_2	13q12.11	SKA3	Duplication
S52	CNV_3	13q34	GAS6;TMEM255B	Duplication	Pinto D , et al. 2010
R0006	CNV_4	14q11.2	SLC7A7	Deletion	Krumm N , et al. 2015
R0134	CNV_5	14q11.2	OR4K1;OR4K2;OR4K3;OR4K5;OR4M1;OR4N2;OR4Q3	Duplication	AlAyadhi LY , et al. 2016
R0145	CNV_5	14q11.2	OR11H2;OR4K1;OR4K2;OR4K3;OR4K5;OR4M1;OR4N2;OR4Q3	Duplication
R0164	CNV_5	14q11.2	OR11H2;OR4K1;OR4K2;OR4K3;OR4K5;OR4M1;OR4N2;OR4Q3	Duplication
R0166	CNV_5	14q11.2	OR11H2;OR4K1;OR4K2;OR4K3;OR4K5;OR4M1;OR4N2;OR4Q3	Duplication
R0223	CNV_5	14q11.2	OR11H2;OR4K1;OR4K2;OR4K3;OR4K5;OR4M1;OR4N2;OR4Q3	Duplication
R0238	CNV_5	14q11.2	OR11H2;OR4K1;OR4K2;OR4K3;OR4K5;OR4M1;OR4N2;OR4Q3	Duplication
R0289-1	CNV_5	14q11.2	OR11H2;OR4K1;OR4K2;OR4K3;OR4K5;OR4M1;OR4N2;OR4Q3	Duplication
R0291	CNV_5	14q11.2	OR11H2;OR4K1;OR4K2;OR4K3;OR4K5;OR4M1;OR4N2;OR4Q3	Duplication
R0328	CNV_5	14q11.2	OR11H2;OR4K1;OR4K2;OR4K3;OR4K5;OR4M1;OR4N2;OR4Q3	Duplication
R0414	CNV_5	14q11.2	OR4K1;OR4K2;OR4K3;OR4K5;OR4M1;OR4N2;OR4Q3	Duplication
S07	CNV_5	14q11.2	OR11H2;OR4K1;OR4K2;OR4K3;OR4K5;OR4M1;OR4N2;OR4Q3	Duplication
S11	CNV_5	14q11.2	OR11H2;OR4K1;OR4K2;OR4K3;OR4K5;OR4M1;OR4N2;OR4Q3	Duplication
S12	CNV_5	14q11.2	OR11H2;OR4K1;OR4K2;OR4K3;OR4K5;OR4M1;OR4N2;OR4Q3	Duplication
S20	CNV_5	14q11.2	OR11H2;OR4K1;OR4K2;OR4K3;OR4K5;OR4M1;OR4N2;OR4Q3	Duplication
S26	CNV_5	14q11.2	OR11H2;OR4K1;OR4K2;OR4K3;OR4K5;OR4M1;OR4N2;OR4Q3	Duplication
S33	CNV_5	14q11.2	OR11H2;OR4K1;OR4K2;OR4K3;OR4K5;OR4M1;OR4N2;OR4Q3	Duplication
R0147	CNV_6	14q24.3	ACOT1;ACOT2;HEATR4	Deletion	Celestino-Soper PB , et al. 2011
S01	CNV_6	14q24.3	ACOT1;ACOT2	Deletion
S20	CNV_6	14q24.3	ACOT1;ACOT2	Deletion
S24	CNV_6	14q24.3	ACOT1;ACOT2	Deletion
S33	CNV_6	14q24.3	ACOT1;ACOT2;HEATR4	Deletion
S52	CNV_6	14q24.3	ACOT1;ACOT2	Deletion
R0527	CNV_7	14q32.33	LINC00226	Deletion	Kaminsky EB , et al. 2011
S52	CNV_8	14q32.33	JAG2	Duplication	Krumm N , et al. 2015
R0327	CNV_9	17p13.1	MYH4	Deletion	O'Roak BJ , et al. 2012
R0327	CNV_9	17p13.1	MYH4	Deletion	Krumm N , et al. 2015
R0145	CNV_10	17p13.3	METTL16;PAFAH1B1	Duplication	Kaminsky EB , et al. 2011
R0147	CNV_10	17p13.3	METTL16;PAFAH1B1	Duplication	Girirajan S , et al. 2011
R0147	CNV_11	17q21.2	TOP2A	Duplication	Krumm N , et al. 2015
R0066	CNV_12	17q21.31	ARHGAP27;ARL17A;ARL17B;CRHR1;KANSL1;LINC02210-CRHR1;MAPT;PLEKHM1;SPPL2C;STH	Deletion	Kaminsky EB , et al. 2011
R0105	CNV_12	17q21.31	ARHGAP27;ARL17A;ARL17B;CRHR1;KANSL1;LINC02210-CRHR1;MAPT;PLEKHM1;SPPL2C;STH	Deletion	Sajan SA , et al. 2013
R0125	CNV_12	17q21.31	ARL17A;ARL17B;CRHR1;KANSL1;LINC02210-CRHR1;MAPT;SPPL2C;STH	Deletion	Asadollahi R , et al. 2014
R0137	CNV_12	17q21.31	ARL17A;ARL17B;CRHR1;KANSL1;LINC02210-CRHR1;MAPT;SPPL2C;STH	Deletion	Di Gregorio E, et al. 2017
R0175	CNV_12	17q21.31	ARL17A;ARL17B;CRHR1;KANSL1;LINC02210-CRHR1;MAPT;SPPL2C;STH	Deletion	Munnich A , et al. 2019
R0232	CNV_13	19p13.11	ANO8;GTPBP3	Duplication	Krumm N , et al. 2015
R0029	CNV_14	19q13.31-q13.2	PSG1;PSG11;PSG2;PSG4;PSG5;PSG6;PSG7;PSG8;PSG9	Deletion	Kaminsky EB , et al. 2011
R0063	CNV_14	19q13.31-q13.2	PSG1;PSG11;PSG2;PSG3;PSG4;PSG5;PSG6;PSG7;PSG8;PSG9	Deletion
R0125	CNV_15	1p21.1	AMY2A;AMY2B	Duplication	Lintas C , et al. 2017
R0398	CNV_16	1q11-p11.2	SRGAP2C	Deletion	Wang S , et al. 2018
R0044	CNV_17	1q31.3	CFHR1;CFHR3	Deletion	Celestino-Soper PB , et al. 2011
R0117	CNV_17	1q31.3	CFHR1;CFHR3	Deletion
R0148	CNV_17	1q31.3	CFHR1;CFHR3	Deletion
R0154	CNV_17	1q31.3	CFHR1;CFHR3	Deletion
R0227	CNV_17	1q31.3	CFHR1;CFHR3	Deletion
R0319	CNV_17	1q31.3	CFHR1;CFHR3	Deletion
R0417	CNV_17	1q31.3	CFHR1;CFHR3	Deletion
R0423	CNV_17	1q31.3	CFHR1;CFHR3	Deletion
R0433	CNV_17	1q31.3	CFHR1;CFHR3	Deletion
R0457	CNV_17	1q31.3	CFHR1;CFHR3	Deletion
R0503	CNV_17	1q31.3	CFHR1;CFHR3	Deletion
R0608	CNV_17	1q31.3	CFHR1;CFHR3	Deletion
R0328	CNV_18	1q44	OR2T10;OR2T11;OR2T29;OR2T34;OR2T35;OR2T5	Deletion	Girirajan S , et al. 2011
S09	CNV_18	1q44	OR2T10;OR2T11;OR2T29;OR2T34;OR2T35;OR2T5	Deletion
R0147	CNV_19	20p12.1	ESF1;NDUFAF5;TASP1	Duplication	Kaminsky EB , et al. 2011
R0292	CNV_20	22q13.1	APOBEC3A;APOBEC3A_B;APOBEC3B	Deletion	Kaminsky EB , et al. 2011
R0246	CNV_21	2p22.1	GALM;SRSF7	Duplication	Krumm N , et al. 2015
R0219	CNV_22	2q31.2	PRKRA	Duplication	Krumm N , et al. 2015
R0246	CNV_22	2q31.2	PRKRA	Duplication
R0286-1	CNV_22	2q31.2	PRKRA	Duplication
R0299	CNV_22	2q31.2	PRKRA	Duplication
R0328	CNV_22	2q31.2	PRKRA	Duplication
R0344	CNV_22	2q31.2	PRKRA	Duplication
R0367	CNV_22	2q31.2	PRKRA	Duplication
R0400	CNV_22	2q31.2	PRKRA	Duplication
R0409	CNV_22	2q31.2	PRKRA	Duplication
R0480	CNV_22	2q31.2	PRKRA	Duplication
R0525	CNV_22	2q31.2	PRKRA	Duplication
R0542	CNV_22	2q31.2	PRKRA	Duplication
R0612	CNV_22	2q31.2	PRKRA	Duplication
R0006	CNV_23	2q35	CDK5R2;FEV;WNT10A;WNT6	Duplication	Pinto D , et al. 2014
S51	CNV_23	2q35	CDK5R2;FEV;WNT10A;WNT6	Duplication
S52	CNV_23	2q35	CDK5R2;FEV;WNT10A;WNT6	Duplication
S46	CNV_24	2q37.1	ALPG;ALPI;ALPP	Duplication	Pinto D , et al. 2010
R0118	CNV_25	2q37.3	AQP12A;AQP12B;KIF1A	Duplication	Pinto D , et al. 2010
R0118	CNV_25	2q37.3	AQP12A;AQP12B;KIF1A	Duplication	Krumm N , et al. 2015
R0118	CNV_25	2q37.3	AQP12A;AQP12B;KIF1A	Duplication	Lintas C , et al. 2017
R0066	CNV_26	3q12.2	ADGRG7	Duplication	Krumm N , et al. 2015
R0423	CNV_26	3q12.2	ADGRG7;TFG	Duplication
R0546	CNV_26	3q12.2	ADGRG7;TFG	Duplication
R0584	CNV_26	3q12.2	ADGRG7;TFG	Duplication
R0619	CNV_26	3q12.2	ADGRG7;TFG	Duplication
S24	CNV_26	3q12.2	ADGRG7;TFG	Duplication
S25	CNV_26	3q12.2	ADGRG7;TFG	Duplication
S49	CNV_27	4q13.2-q13.3	UGT2B11;UGT2B28	Deletion	Pinto D , et al. 2010
S51	CNV_28	6p22.2	HIST1H1D;HIST1H2AD;HIST1H2AE;HIST1H2BD;HIST1H2BE;HIST1H2BF;HIST1H2BG;HIST1H2BH;HIST1H2BI;HIST1H3D;HIST1H3E;HIST1H3F;HIST1H3G;HIST1H4D;HIST1H4E;HIST1H4F;HIST1H4G	Deletion	Pinto D , et al. 2010
S52	CNV_29	9q34.3	ABCA2;AJM1;ANAPC2;C8G;C9orf139;CLIC3;CYSRT1;DPP7;EDF1;ENTPD2;ENTPD8;EXD3;FAM166A;FBXW5;FUT7;GRIN1;LCN12;LCNL1;LRRC26;MAMDC4;MAN1B1;NDOR1;NELFB;NOXA1;NPDC1;NRARP;NSMF;PAXX;PHPT1;PNPLA7;PTGDS;RABL6;RNF208;RNF224;SAPCD2;SLC34A3;SSNA1;STPG3;TMEM203;TMEM210;TOR4A;TPRN;TRAF2;TUBB4B;UAP1L1	Duplication	Yatsenko SA , et al. 2012
Note.	The intersection procedure was performed using the command: bedtools intersect -a case_and_control.hg38.bed -b autdb.bed -f 0.70 -r -wa -wb > output
	The loci located on sex chromosomes and the loci containing HLA genes were removed from the analysis.
	The ID containing the prefix R or S corresponds to an individual from the ASD or nonASD cohort, respectively.
