# Supplementary material for: A Study of the Genomic Variations Associated with Autistic Spectrum Disorders in a Russian Cohort of Patients Using Whole-Exome Sequencing
Source: Genes (Basel). 2022 May 20;13(5):920. doi: 10.3390/genes13050920 (PMC9141003; doi:10.3390/genes13050920)
Supplement: Supplementary file 1 [file genes-13-00920-s001.zip › Table S6.xlsx]

## Sheet: S6 Table
Table S6. CNV dataset and Developmental delay morbidity map intersection results
Chrom	Start	End	Length	CN_type	Conrad_CNVs	Sample_id	Cohort
chr1	180314640	180495576	180937	CN4	-	R0145	ASD
chr2	240682229	240769736	87508	CN5	-	R0118	ASD
chr3	98132695	98498633	365939	CN1	-	R0016	ASD
chr3	2886988	2988523	101536	CN1	-	R0029	ASD
chr3	193483884	193665047	181164	CN3	-	R0145	ASD
chr8	99135544	99821533	685990	CN1	-	R0006	ASD
chr8	99134963	99835375	700413	CN1	-	R0083	ASD
chr9	72688657	72830570	141914	CN1	-	R0029	ASD
chr11	121190654	121307563	116910	CN1	-	R0006	ASD
chr11	121190654	121307563	116910	CN1	-	R0019	ASD
chr11	121190654	121307563	116910	CN0	-	R0029	ASD
chr11	121190654	121307563	116910	CN1	-	R0038	ASD
chr11	121190654	121307563	116910	CN0	-	R0083	ASD
chr11	87067642	87328836	261195	CN3	-	R0093	ASD
chr11	121190654	121307563	116910	CN1	-	R0117	ASD
chr11	87091310	87328836	237527	CN5	-	R0147	ASD
chr11	87067642	87328836	261195	CN3	-	R0154	ASD
chr11	87067642	87328836	261195	CN3	-	R0164	ASD
chr14	106421710	106507302	85593	CN0	CNVR6294.56	R0395	ASD
chr15	42963883	43086291	122409	CN1	-	R0029	ASD
chr16	82858360	83171593	313234	CN1	-	R0083	ASD
chr16	78108371	78278707	170337	CN3	-	R0125	ASD
chr17	35360200	35522379	162180	CN1	-	R0006	ASD
chr17	30384986	30455516	70531	CN1	-	R0029	ASD
chr17	35360200	35522379	162180	CN1	-	R0029	ASD
chr17	45429485	46172153	742669	CN0	-	R0066	ASD
chr17	45429485	46172153	742669	CN0	-	R0105	ASD
chr17	45503247	46034328	531082	CN0	-	R0125	ASD
chr17	45503247	46034328	531082	CN0	-	R0137	ASD
chr17	45503247	46034328	531082	CN0	-	R0175	ASD
chr19	42518927	43268151	749225	CN1	-	R0006	ASD
chr19	42754292	43268151	513860	CN1	-	R0029	ASD
chr19	42729108	43268151	539044	CN1	-	R0063	ASD
chr19	21970601	23935474	1964874	CN5	-	R0093	ASD
chr20	13587247	13818421	231174	CN4	-	R0147	ASD
chr22	45689660	45718544	28885	CN1	-	R0006	ASD
chr22	45689660	45718544	28885	CN1	-	R0019	ASD
chr22	45689660	45718544	28885	CN1	-	R0027	ASD
chr22	45689660	45718544	28885	CN1	-	R0038	ASD
chr22	45689660	45718544	28885	CN0	-	R0083	ASD
chr1	247921015	248559491	638476	CN1	-	S52	nonASD
chr10	132942435	133276819	334385	CN4	-	S52	nonASD
chr12	131786460	131930137	143678	CN5	-	S52	nonASD
chr14	102452391	102593327	140937	CN5	-	S52	nonASD
chr18	66568413	68677195	2108783	CN1	-	S49	nonASD
chr18	79714488	79964786	250299	CN6	-	S52	nonASD
chr19	42518939	43195273	676335	CN1	-	S52	nonASD
chr2	232378968	232456467	77500	CN4	-	S46	nonASD
chr3	98087170	98498633	411464	CN1	-	S49	nonASD
chr3	98132695	98498633	365939	CN1	-	S53	nonASD
chr8	144434808	144530873	96067	CN4	-	S46	nonASD
chr8	144434808	144700728	265923	CN4	-	S52	nonASD
