# Supplementary material for: A Study of the Genomic Variations Associated with Autistic Spectrum Disorders in a Russian Cohort of Patients Using Whole-Exome Sequencing
Source: Genes (Basel). 2022 May 20;13(5):920. doi: 10.3390/genes13050920 (PMC9141003; doi:10.3390/genes13050920)
Supplement: Supplementary file 1 [file genes-13-00920-s001.zip › Table S7.xlsx]

## Sheet: S7 Table
Table S7.	List of genes located within the CNVs' loci detected in the studied cohorts, ASD and nonASD.
Gene_Symbol	Gene Name	Enseml ID	Cytogenetic band	ASD	nonASD
AARS2	alanyl-tRNA synthetase 2, mitochondrial	ENSG00000124608	6p21.1	Yes	No
AASS	aminoadipate-semialdehyde synthase	ENSG00000008311	7q31.32	Yes	No
AATF	apoptosis antagonizing transcription factor	ENSG00000275700, ENSG00000276072	17q12	Yes	No
AATK	apoptosis associated tyrosine kinase	ENSG00000181409	17q25.3	No	Yes
ABCA10	ATP binding cassette subfamily A member 10	ENSG00000154263	17q24.3	Yes	No
ABCA12	ATP binding cassette subfamily A member 12	ENSG00000144452	2q35	Yes	No
ABCA2	ATP binding cassette subfamily A member 2	ENSG00000107331	9q34.3	No	Yes
ABCA5	ATP binding cassette subfamily A member 5	ENSG00000154265	17q24.3	Yes	No
ABCA6	ATP binding cassette subfamily A member 6	ENSG00000154262	17q24.2-q24.3	Yes	No
ABCA9	ATP binding cassette subfamily A member 9	ENSG00000154258	17q24.2	Yes	No
ABCB7	ATP binding cassette subfamily B member 7	ENSG00000131269	Xq13.3	Yes	No
ABCC9	ATP binding cassette subfamily C member 9	ENSG00000069431	12p12.1	Yes	No
ABCD2	ATP binding cassette subfamily D member 2	ENSG00000173208	12q12	Yes	No
ABCD3	ATP binding cassette subfamily D member 3	ENSG00000117528	1p21.3	Yes	No
ABO	ABO, alpha 1-3-N-acetylgalactosaminyltransferase and alpha 1-3-galactosyltransferase	ENSG00000175164, ENSG00000281879	9q34.2	Yes	No
ACACA	acetyl-CoA carboxylase alpha	ENSG00000278540, ENSG00000275176	17q12	Yes	No
ACAD9	acyl-CoA dehydrogenase family member 9	ENSG00000177646	3q21.3	No	Yes
ACADM	acyl-CoA dehydrogenase medium chain	ENSG00000117054	1p31.1	Yes	No
ACADS	acyl-CoA dehydrogenase short chain	ENSG00000122971	12q24.31	No	Yes
ACAP3	ArfGAP with coiled-coil, ankyrin repeat and PH domains 3	ENSG00000131584	1p36.33	No	Yes
ACAT1	acetyl-CoA acetyltransferase 1	ENSG00000075239	11q22.3	Yes	No
ACBD6	acyl-CoA binding domain containing 6	ENSG00000230124	1q25.2-q25.3	Yes	No
ACER3	alkaline ceramidase 3	ENSG00000078124	11q13.5	Yes	No
ACOT1	acyl-CoA thioesterase 1	ENSG00000184227	14q24.3	Yes	Yes
ACOT2	acyl-CoA thioesterase 2	ENSG00000119673	14q24.3	Yes	Yes
ACOX1	acyl-CoA oxidase 1	ENSG00000161533	17q25.1	Yes	No
ACSL4	acyl-CoA synthetase long chain family member 4	ENSG00000068366	Xq23	Yes	No
ACSM3	acyl-CoA synthetase medium chain family member 3	ENSG00000005187	16p12.3	Yes	No
ADAM10	ADAM metallopeptidase domain 10	ENSG00000137845	15q21.3	Yes	No
ADAM28	ADAM metallopeptidase domain 28	ENSG00000042980	8p21.2	No	Yes
ADAM33	ADAM metallopeptidase domain 33	ENSG00000149451	20p13	No	Yes
ADAM3A	ADAM metallopeptidase domain 3A (pseudogene)	ENSG00000197475	8p11.22	No	Yes
ADAM6	ADAM metallopeptidase domain 6 (pseudogene)	ENSG00000271968, ENSG00000282626	14q32.33	Yes	Yes
ADAM8	ADAM metallopeptidase domain 8	ENSG00000151651	10q26.3	No	Yes
ADAMTS13	ADAM metallopeptidase with thrombospondin type 1 motif 13	ENSG00000160323, ENSG00000281244	9q34.2	Yes	No
ADAMTS18	ADAM metallopeptidase with thrombospondin type 1 motif 18	ENSG00000140873	16q23.1	Yes	No
ADAMTS20	ADAM metallopeptidase with thrombospondin type 1 motif 20	ENSG00000173157	12q12	Yes	No
ADD1	adducin 1	ENSG00000087274	4p16.3	No	Yes
ADGRA1	adhesion G protein-coupled receptor A1	ENSG00000197177	10q26.3	No	Yes
ADGRB1	adhesion G protein-coupled receptor B1	ENSG00000181790	8q24.3	No	Yes
ADGRG7	adhesion G protein-coupled receptor G7	ENSG00000144820	3q12.2	Yes	Yes
ADGRL4	adhesion G protein-coupled receptor L4	ENSG00000162618	1p31.1	Yes	No
ADK	adenosine kinase	ENSG00000156110	10q22.2	Yes	No
ADNP	activity dependent neuroprotector homeobox	ENSG00000101126	20q13.13	Yes	No
ADPRM	ADP-ribose/CDP-alcohol diphosphatase, manganese dependent	ENSG00000170222	17p13.1	Yes	No
ADRA2A	adrenoceptor alpha 2A	ENSG00000150594	10q25.2	Yes	No
ADRM1	adhesion regulating molecule 1	ENSG00000130706	20q13.33	No	Yes
AEBP1	AE binding protein 1	ENSG00000106624	7p13	No	Yes
AGA	aspartylglucosaminidase	ENSG00000038002	4q34.3	Yes	No
AGAP12P	ArfGAP with GTPase domain, ankyrin repeat and PH domain 12, pseudogene	ENSG00000265018	10q11.22	Yes	No
AGAP3	ArfGAP with GTPase domain, ankyrin repeat and PH domain 3	ENSG00000133612	7q36.1	No	Yes
AGFG2	ArfGAP with FG repeats 2	ENSG00000106351	7q22.1	No	Yes
AGGF1	angiogenic factor with G-patch and FHA domains 1	ENSG00000164252	5q13.3	Yes	No
AGL	amylo-alpha-1, 6-glucosidase, 4-alpha-glucanotransferase	ENSG00000162688	1p21.2	Yes	No
AGPAT2	1-acylglycerol-3-phosphate O-acyltransferase 2	ENSG00000169692	9q34.3	No	Yes
AGPS	alkylglycerone phosphate synthase	ENSG00000018510	2q31.2	Yes	No
AGRN	agrin	ENSG00000188157	1p36.33	No	Yes
AHCTF1	AT-hook containing transcription factor 1	ENSG00000153207	1q44	Yes	Yes
AIP	aryl hydrocarbon receptor interacting protein	ENSG00000110711	11q13.2	No	Yes
AIRE	autoimmune regulator	ENSG00000160224	21q22.3	No	Yes
AJM1	apical junction component 1 homolog	ENSG00000232434	9q34.3	No	Yes
AKAP10	A-kinase anchoring protein 10	ENSG00000108599	17p11.2	Yes	No
AKAP9	A-kinase anchoring protein 9	ENSG00000127914	7q21.2	Yes	No
ALCAM	activated leukocyte cell adhesion molecule	ENSG00000170017	3q13.11	No	Yes
ALDH3A2	aldehyde dehydrogenase 3 family member A2	ENSG00000072210	17p11.2	Yes	No
ALG6	ALG6 alpha-1,3-glucosyltransferase	ENSG00000088035	1p31.3	Yes	No
ALG8	ALG8 alpha-1,3-glucosyltransferase	ENSG00000159063	11q14.1	Yes	No
ALKBH4	alkB homolog 4, lysine demethylase	ENSG00000160993	7q22.1	No	Yes
ALMS1	ALMS1 centrosome and basal body associated protein	ENSG00000116127	2p13.1	Yes	Yes
ALPG	alkaline phosphatase, germ cell	ENSG00000163286	2q37.1	No	Yes
ALPI	alkaline phosphatase, intestinal	ENSG00000163295	2q37.1	No	Yes
ALPP	alkaline phosphatase, placental	ENSG00000163283	2q37.1	No	Yes
ALS2	alsin Rho guanine nucleotide exchange factor ALS2	ENSG00000003393	2q33.1	Yes	No
ALX1	ALX homeobox 1	ENSG00000180318	12q21.31	Yes	No
AMN	amnion associated transmembrane protein	ENSG00000166126	14q32.32	No	Yes
AMY2A	amylase alpha 2A	ENSG00000243480	1p21.1	Yes	No
AMY2B	amylase alpha 2B	ENSG00000240038	1p21.1	Yes	No
AMZ1	archaelysin family metallopeptidase 1	ENSG00000174945	7p22.3	No	Yes
ANAPC2	anaphase promoting complex subunit 2	ENSG00000176248	9q34.3	No	Yes
ANGPTL3	angiopoietin like 3	ENSG00000132855	1p31.3	Yes	No
ANGPTL5	angiopoietin like 5	ENSG00000187151	11q22.1	Yes	No
ANKEF1	ankyrin repeat and EF-hand domain containing 1	ENSG00000132623	20p12.2	Yes	No
ANKMY1	ankyrin repeat and MYND domain containing 1	ENSG00000144504	2q37.3	No	Yes
ANKRD18A	ankyrin repeat domain 18A	ENSG00000180071	9p13.1	Yes	No
ANKRD18B	ankyrin repeat domain 18B	ENSG00000230453	9p13.3	Yes	No
ANKRD20A1	ankyrin repeat domain 20 family member A1	ENSG00000260691	9q21.11	Yes	No
ANKRD20A3	ankyrin repeat domain 20 family member A3	ENSG00000276203	9q21.11	Yes	No
ANKRD20A4	ankyrin repeat domain 20 family member A4	ENSG00000172014	9q13	Yes	No
ANKRD26	ankyrin repeat domain 26	ENSG00000107890	10p12.1	Yes	No
ANKRD26P1	ankyrin repeat domain 26 pseudogene 1	NA	16q11.2	Yes	No
ANKRD30A	ankyrin repeat domain 30A	ENSG00000148513	10p11.21	Yes	No
ANKRD36	ankyrin repeat domain 36	ENSG00000135976	2q11.2	Yes	No
ANKRD36B	ankyrin repeat domain 36B	ENSG00000196912	2q11.2	Yes	No
ANKRD65	ankyrin repeat domain 65	ENSG00000235098	1p36.33	No	Yes
ANKRD9	ankyrin repeat domain 9	ENSG00000156381	14q32.31	No	Yes
ANO10	anoctamin 10	ENSG00000160746	3p22.1-p21.33	Yes	No
ANO5	anoctamin 5	ENSG00000171714	11p14.3	Yes	No
ANO6	anoctamin 6	ENSG00000177119	12q12	Yes	No
ANO8	anoctamin 8	ENSG00000074855	19p13.11	Yes	No
ANXA8	annexin A8	ENSG00000265190	10q11.22	Yes	No
ANXA8L1	annexin A8 like 1	ENSG00000264230	10q11.22	Yes	No
AP1B1	adaptor related protein complex 1 subunit beta 1	ENSG00000100280	22q12.2	No	Yes
AP1G1	adaptor related protein complex 1 subunit gamma 1	ENSG00000166747	16q22.2	Yes	No
AP3B1	adaptor related protein complex 3 subunit beta 1	ENSG00000132842	5q14.1	Yes	No
AP4E1	adaptor related protein complex 4 subunit epsilon 1	ENSG00000081014	15q21.2	Yes	No
AP5Z1	adaptor related protein complex 5 subunit zeta 1	ENSG00000242802	7p22.1	No	Yes
APAF1	apoptotic peptidase activating factor 1	ENSG00000120868	12q23.1	Yes	No
APCDD1L	APC down-regulated 1 like	ENSG00000198768	20q13.32	Yes	No
APOBEC3A	apolipoprotein B mRNA editing enzyme catalytic subunit 3A	ENSG00000128383, ENSG00000262156	22q13.1	Yes	No
APOBEC3A_B	APOBEC3A and APOBEC3B deletion hybrid	ENSG00000262156, ENSG00000128383	22q13 alternate reference locus	Yes	No
APOBEC3B	apolipoprotein B mRNA editing enzyme catalytic subunit 3B	ENSG00000179750	22q13.1	Yes	No
AQP12A	aquaporin 12A	ENSG00000184945	2q37.3	Yes	No
AQP12B	aquaporin 12B	ENSG00000185176	2q37.3	Yes	No
ARF1	ADP ribosylation factor 1	ENSG00000143761	1q42.13	No	Yes
ARFGAP3	ADP ribosylation factor GTPase activating protein 3	ENSG00000242247	22q13.2	Yes	No
ARFGEF2	ADP ribosylation factor guanine nucleotide exchange factor 2	ENSG00000124198	20q13.13	Yes	No
ARHGAP27	Rho GTPase activating protein 27	ENSG00000159314, ENSG00000276836, ENSG00000276907	17q21.31	Yes	No
ARHGAP29	Rho GTPase activating protein 29	ENSG00000137962	1p22.1	Yes	No
ARHGAP39	Rho GTPase activating protein 39	ENSG00000147799	8q24.3	No	Yes
ARHGEF16	Rho guanine nucleotide exchange factor 16	ENSG00000130762	1p36.32	No	Yes
ARHGEF35	Rho guanine nucleotide exchange factor 35	ENSG00000213214, ENSG00000284790, ENSG00000288422	7q35	Yes	Yes
ARHGEF5	Rho guanine nucleotide exchange factor 5	ENSG00000050327, ENSG00000284933	7q35	Yes	No
ARID4B	AT-rich interaction domain 4B	ENSG00000054267	1q42.3	Yes	No
ARL13B	ADP ribosylation factor like GTPase 13B	ENSG00000169379	3q11.1-q11.2	Yes	No
ARL17A	ADP ribosylation factor like GTPase 17A	ENSG00000185829, ENSG00000228696, ENSG00000275748, ENSG00000276276	17q21.31	Yes	No
ARL17B	ADP ribosylation factor like GTPase 17B	ENSG00000228696, ENSG00000275748, ENSG00000276276, ENSG00000185829	17q21.31	Yes	No
ARL6	ADP ribosylation factor like GTPase 6	ENSG00000113966	3q11.2	Yes	No
ARL6IP4	ADP ribosylation factor like GTPase 6 interacting protein 4	ENSG00000182196	12q24.31	No	Yes
ASAH1	N-acylsphingosine amidohydrolase 1	ENSG00000104763	8p22	Yes	No
ASB18	ankyrin repeat and SOCS box containing 18	ENSG00000182177	2q37.2	No	Yes
ASCC1	activating signal cointegrator 1 complex subunit 1	ENSG00000138303	10q22.1	Yes	No
ASPA	aspartoacylase	ENSG00000108381	17p13.2	Yes	No
ASPG	asparaginase	ENSG00000166183	14q32.33	No	Yes
ASPM	abnormal spindle microtubule assembly	ENSG00000066279	1q31.3	Yes	No
ASPN	asporin	ENSG00000106819	9q22.31	Yes	No
ASZ1	ankyrin repeat, SAM and basic leucine zipper domain containing 1	ENSG00000154438	7q31.2	Yes	No
ATAD2B	ATPase family AAA domain containing 2B	ENSG00000119778	2p24.1-p23.3	Yes	No
ATAD3A	ATPase family AAA domain containing 3A	ENSG00000197785	1p36.33	Yes	Yes
ATAD3B	ATPase family AAA domain containing 3B	ENSG00000160072	1p36.33	Yes	Yes
ATAD3C	ATPase family AAA domain containing 3C	ENSG00000215915	1p36.33	No	Yes
ATAD5	ATPase family AAA domain containing 5	ENSG00000176208	17q11.2	Yes	No
ATF1	activating transcription factor 1	ENSG00000123268	12q13.12	Yes	No
ATF7IP2	activating transcription factor 7 interacting protein 2	ENSG00000166669	16p13.2-p13.13	Yes	No
ATG2A	autophagy related 2A	ENSG00000110046	11q13.1	No	Yes
ATG2B	autophagy related 2B	ENSG00000066739	14q32.2	Yes	No
ATG4C	autophagy related 4C cysteine peptidase	ENSG00000125703	1p31.3	Yes	No
ATM	ATM serine/threonine kinase	ENSG00000149311	11q22.3	Yes	No
ATP13A3	ATPase 13A3	ENSG00000133657	3q29	Yes	No
ATP13A4	ATPase 13A4	ENSG00000127249	3q29	Yes	No
ATP2A2	ATPase sarcoplasmic/endoplasmic reticulum Ca2+ transporting 2	ENSG00000174437	12q24.11	Yes	No
ATP2A3	ATPase sarcoplasmic/endoplasmic reticulum Ca2+ transporting 3	ENSG00000074370	17p13.2	No	Yes
ATP2C1	ATPase secretory pathway Ca2+ transporting 1	ENSG00000017260	3q22.1	Yes	No
ATP6AP2	ATPase H+ transporting accessory protein 2	ENSG00000182220	Xp11.4	Yes	No
ATP6V0A1	ATPase H+ transporting V0 subunit a1	ENSG00000033627	17q21.2	Yes	No
ATR	ATR serine/threonine kinase	ENSG00000175054	3q23	Yes	No
ATRN	attractin	ENSG00000088812	20p13	Yes	No
ATXN10	ataxin 10	ENSG00000130638	22q13.31	Yes	No
AUH	AU RNA binding methylglutaconyl-CoA hydratase	ENSG00000148090	9q22.31	Yes	No
AURKAIP1	aurora kinase A interacting protein 1	ENSG00000175756	1p36.33	No	Yes
AVP	arginine vasopressin	ENSG00000101200	20p13	No	Yes
AZI2	5-azacytidine induced 2	ENSG00000163512	3p24.1	Yes	Yes
B3GALNT2	beta-1,3-N-acetylgalactosaminyltransferase 2	ENSG00000162885, ENSG00000282880	1q42.3	Yes	No
B3GALT6	beta-1,3-galactosyltransferase 6	ENSG00000176022	1p36.33	No	Yes
B4GALNT4	beta-1,4-N-acetyl-galactosaminyltransferase 4	ENSG00000182272	11p15.5	No	Yes
BAG5	BCL2 associated athanogene 5	ENSG00000166170	14q32.33	No	Yes
BASP1	brain abundant membrane attached signal protein 1	ENSG00000176788	5p15.1	Yes	No
BBS2	Bardet-Biedl syndrome 2	ENSG00000125124	16q13	Yes	No
BBS4	Bardet-Biedl syndrome 4	ENSG00000140463	15q24.1	Yes	No
BBS5	Bardet-Biedl syndrome 5	ENSG00000163093	2q31.1	Yes	No
BBS7	Bardet-Biedl syndrome 7	ENSG00000138686	4q27	Yes	No
BBS9	Bardet-Biedl syndrome 9	ENSG00000122507	7p14.3	Yes	No
BCHE	butyrylcholinesterase	ENSG00000114200	3q26.1	Yes	No
BCL11B	BAF chromatin remodeling complex subunit BCL11B	ENSG00000127152	14q32.2	Yes	No
BCO1	beta-carotene oxygenase 1	ENSG00000135697	16q23.2	Yes	No
BCO2	beta-carotene oxygenase 2	ENSG00000197580	11q23.1	Yes	No
BLM	BLM RecQ like helicase	ENSG00000197299	15q26.1	Yes	No
BRAF	B-Raf proto-oncogene, serine/threonine kinase	ENSG00000157764	7q34	Yes	No
BRAT1	BRCA1 associated ATM activator 1	ENSG00000106009	7p22.3	No	Yes
BRCA1	BRCA1 DNA repair associated	ENSG00000012048	17q21.31	Yes	No
BRCA2	BRCA2 DNA repair associated	ENSG00000139618	13q13.1	Yes	No
BRF1	BRF1 RNA polymerase III transcription initiation factor subunit	ENSG00000185024	14q32.33	No	Yes
BRIP1	BRCA1 interacting protein C-terminal helicase 1	ENSG00000136492	17q23.2	Yes	No
BSPH1	binder of sperm protein homolog 1	ENSG00000188334	19q13.33	Yes	No
BSX	brain specific homeobox	ENSG00000188909	11q24.1	Yes	No
BTNL3	butyrophilin like 3	ENSG00000168903	5q35.3	Yes	Yes
BTNL8	butyrophilin like 8	ENSG00000113303	5q35.3	Yes	Yes
BUB1B	BUB1 mitotic checkpoint serine/threonine kinase B	ENSG00000156970	15q15.1	Yes	No
BUB3	BUB3 mitotic checkpoint protein	ENSG00000154473	10q26.13	No	Yes
C11orf65	chromosome 11 open reading frame 65	ENSG00000166323	11q22.3	Yes	No
C11orf95	chromosome 11 open reading frame 95	ENSG00000188070	11q13.1	No	Yes
C12orf29	chromosome 12 open reading frame 29	ENSG00000133641	12q21.32	Yes	No
C12orf50	chromosome 12 open reading frame 50	ENSG00000165805	12q21.32	Yes	No
C14orf39	chromosome 14 open reading frame 39	ENSG00000179008	14q23.1	No	Yes
C16orf46	chromosome 16 open reading frame 46	ENSG00000166455	16q23.2	Yes	No
C17orf78	chromosome 17 open reading frame 78	ENSG00000278505, ENSG00000278145	17q12	Yes	No
C18orf32	chromosome 18 open reading frame 32	ENSG00000177576	18q21.1	Yes	No
C19orf44	chromosome 19 open reading frame 44	ENSG00000105072	19p13.11	Yes	No
C1orf146	chromosome 1 open reading frame 146	ENSG00000203910	1p22.1	Yes	No
C1orf159	chromosome 1 open reading frame 159	ENSG00000131591	1p36.33	No	Yes
C1orf35	chromosome 1 open reading frame 35	ENSG00000143793	1q42.13	No	Yes
C1QTNF12	C1q and TNF related 12	ENSG00000184163	1p36.33	No	Yes
C1QTNF8	C1q and TNF related 8	ENSG00000184471	16p13.3	No	Yes
C20orf204	chromosome 20 open reading frame 204	ENSG00000196421	20q13.33	No	Yes
C20orf27	chromosome 20 open reading frame 27	ENSG00000101220	20p13	No	Yes
C2CD3	C2 domain containing 3 centriole elongation regulator	ENSG00000168014	11q13.4	Yes	No
C4A	complement C4A (Rodgers blood group)	ENSG00000244731, ENSG00000206340, ENSG00000244207, ENSG00000227746	6p21.33	Yes	No
C4B	complement C4B (Chido blood group)	ENSG00000224389, ENSG00000228454, ENSG00000236625, ENSG00000224639, ENSG00000228267	6p21.33	Yes	No
C4B_2	complement component 4B (Chido blood group), copy 2	ENSG00000233312	NA	Yes	No
C4orf48	chromosome 4 open reading frame 48	ENSG00000243449	4p16.3	No	Yes
C5	complement C5	ENSG00000106804	9q33.2	Yes	No
C5orf38	chromosome 5 open reading frame 38	ENSG00000186493	5p15.33	No	Yes
C7orf50	chromosome 7 open reading frame 50	ENSG00000146540	7p22.3	No	Yes
C8G	complement C8 gamma chain	ENSG00000176919	9q34.3	No	Yes
C8orf82	chromosome 8 open reading frame 82	ENSG00000213563	8q24.3	No	Yes
C9	complement C9	ENSG00000113600	5p13.1	Yes	No
C9orf139	chromosome 9 open reading frame 139	ENSG00000180539	9q34.3	No	Yes
C9orf163	chromosome 9 open reading frame 163	ENSG00000196366	9q34.3	No	Yes
CABIN1	calcineurin binding protein 1	ENSG00000099991, ENSG00000281670	22q11.23	Yes	No
CACNA1H	calcium voltage-gated channel subunit alpha1 H	ENSG00000196557	16p13.3	No	Yes
CACNA2D1	calcium voltage-gated channel auxiliary subunit alpha2delta 1	ENSG00000153956	7q21.11	Yes	No
CACTIN	cactin, spliceosome C complex subunit	ENSG00000105298	19p13.3	No	Yes
CALCR	calcitonin receptor	ENSG00000004948	7q21.3	No	Yes
CALHM1	calcium homeostasis modulator 1	ENSG00000185933	10q24.33	No	Yes
CALHM3	calcium homeostasis modulator 3	ENSG00000183128	10q24.33	No	Yes
CALR3	calreticulin 3	ENSG00000269058	19p13.11	Yes	No
CAMK2N2	calcium/calmodulin dependent protein kinase II inhibitor 2	ENSG00000163888	3q27.1	No	Yes
CAMKMT	calmodulin-lysine N-methyltransferase	ENSG00000143919	2p21	Yes	No
CAMSAP2	calmodulin regulated spectrin associated protein family member 2	ENSG00000118200	1q32.1	Yes	No
CAPN10	calpain 10	ENSG00000142330	2q37.3	No	Yes
CAPN15	calpain 15	ENSG00000103326, ENSG00000282214	16p13.3	No	Yes
CARD8	caspase recruitment domain family member 8	ENSG00000105483	19q13.33	Yes	No
CARD9	caspase recruitment domain family member 9	ENSG00000187796	9q34.3	No	Yes
CARNS1	carnosine synthase 1	ENSG00000172508	11q13.2	No	Yes
CARS2	cysteinyl-tRNA synthetase 2, mitochondrial	ENSG00000134905	13q34	No	Yes
CASC4	cancer susceptibility 4	ENSG00000166734	15q15.3	Yes	No
CASK	calcium/calmodulin dependent serine protein kinase	ENSG00000147044	Xp11.4	Yes	No
CATSPERD	cation channel sperm associated auxiliary subunit delta	ENSG00000174898	19p13.3	Yes	No
CBARP	CACN subunit beta associated regulatory protein	ENSG00000099625	19p13.3	No	Yes
CBL	Cbl proto-oncogene	ENSG00000110395	11q23.3	Yes	No
CBS	cystathionine beta-synthase	ENSG00000160200	21q22.3	Yes	No
CBSL	cystathionine beta-synthase like	ENSG00000274276	21p12	Yes	No
CBWD1	COBW domain containing 1	ENSG00000172785	9p24.3	Yes	No
CBWD2	COBW domain containing 2	ENSG00000136682	2q14.1	Yes	Yes
CC2D2B	coiled-coil and C2 domain containing 2B	ENSG00000188649	10q24.1	Yes	No
CCAR1	cell division cycle and apoptosis regulator 1	ENSG00000060339	10q21.3	Yes	No
CCDC116	coiled-coil domain containing 116	ENSG00000161180	22q11.21	No	Yes
CCDC138	coiled-coil domain containing 138	ENSG00000163006	2q13	Yes	No
CCDC14	coiled-coil domain containing 14	ENSG00000175455	3q21.1	Yes	No
CCDC144A	coiled-coil domain containing 144A	ENSG00000170160	17p11.2	Yes	Yes
CCDC144B	coiled-coil domain containing 144B (pseudogene)	ENSG00000154874	17p11.2	Yes	No
CCDC144CP	coiled-coil domain containing 144C, pseudogene	NA	17p11.2	Yes	No
CCDC146	coiled-coil domain containing 146	ENSG00000135205	7q11.23	Yes	No
CCDC172	coiled-coil domain containing 172	ENSG00000182645	10q25.3	Yes	No
CCDC18	coiled-coil domain containing 18	ENSG00000122483	1p22.1	Yes	No
CCDC186	coiled-coil domain containing 186	ENSG00000165813	10q25.3	Yes	No
CCDC39	coiled-coil domain containing 39	ENSG00000284862	3q26.33	Yes	No
CCDC43	coiled-coil domain containing 43	ENSG00000180329	17q21.31	Yes	No
CCDC50	coiled-coil domain containing 50	ENSG00000152492	3q28	Yes	No
CCDC73	coiled-coil domain containing 73	ENSG00000186714	11p13	Yes	Yes
CCDC88B	coiled-coil domain containing 88B	ENSG00000168071	11q13.1	No	Yes
CCL3	C-C motif chemokine ligand 3	ENSG00000277632, ENSG00000278567, ENSG00000274221	17q12	Yes	No
CCL3L1	C-C motif chemokine ligand 3 like 1	ENSG00000277796, ENSG00000277768, ENSG00000276085, ENSG00000277336	17q21.1	Yes	Yes
CCL3L3	C-C motif chemokine ligand 3 like 3	ENSG00000276085, ENSG00000277796, ENSG00000277768, ENSG00000277336	17q12	Yes	Yes
CCL4L1	C-C motif chemokine ligand 4 like 1	ENSG00000275313, ENSG00000276070	17q12	Yes	Yes
CCL4L2	C-C motif chemokine ligand 4 like 2	ENSG00000276070, ENSG00000282604, ENSG00000275313, ENSG00000276125	17q12	Yes	Yes
CCNL2	cyclin L2	ENSG00000221978	1p36.33	No	Yes
CCP110	centriolar coiled-coil protein 110	ENSG00000103540	16p12.3	Yes	No
CCT6A	chaperonin containing TCP1 subunit 6A	ENSG00000146731	7p11.2	Yes	No
CCT6B	chaperonin containing TCP1 subunit 6B	ENSG00000132141	17q12	Yes	No
CCZ1B	CCZ1 homolog B, vacuolar protein trafficking and biogenesis associated	ENSG00000146574	7p22.1	Yes	Yes
CD177	CD177 molecule	ENSG00000204936	19q13.31	No	Yes
CD1E	CD1e molecule	ENSG00000158488	1q23.1	Yes	No
CD2AP	CD2 associated protein	ENSG00000198087	6p12.3	Yes	No
CD36	CD36 molecule	ENSG00000135218	7q21.11	Yes	No
CD46	CD46 molecule	ENSG00000117335	1q32.2	Yes	No
CDC27	cell division cycle 27	ENSG00000004897	17q21.32	Yes	No
CDC42BPA	CDC42 binding protein kinase alpha	ENSG00000143776	1q42.13	Yes	No
CDC42BPB	CDC42 binding protein kinase beta	ENSG00000198752	14q32.32	No	Yes
CDC6	cell division cycle 6	ENSG00000094804	17q21.2	Yes	No
CDH13	cadherin 13	ENSG00000140945	16q23.3	Yes	No
CDH18	cadherin 18	ENSG00000145526	5p14.3	Yes	No
CDH19	cadherin 19	ENSG00000071991	18q22.1	No	Yes
CDH8	cadherin 8	ENSG00000150394	16q21	No	Yes
CDK11A	cyclin dependent kinase 11A	ENSG00000008128	1p36.33	Yes	No
CDK12	cyclin dependent kinase 12	ENSG00000167258	17q12	Yes	No
CDK5R2	cyclin dependent kinase 5 regulatory subunit 2	ENSG00000171450	2q35	Yes	Yes
CDK5RAP2	CDK5 regulatory subunit associated protein 2	ENSG00000136861	9q33.2	Yes	No
CDKL3	cyclin dependent kinase like 3	ENSG00000006837	5q31.1	Yes	No
CDX2	caudal type homeobox 2	ENSG00000165556	13q12.2	No	Yes
CEACAM1	CEA cell adhesion molecule 1	ENSG00000079385	19q13.2	Yes	Yes
CEACAM21	CEA cell adhesion molecule 21	ENSG00000007129, ENSG00000278565	19q13.2	Yes	No
CEACAM3	CEA cell adhesion molecule 3	ENSG00000170956	19q13.2	Yes	No
CEACAM4	CEA cell adhesion molecule 4	ENSG00000105352, ENSG00000274131	19q13.2	Yes	No
CEACAM6	CEA cell adhesion molecule 6	ENSG00000086548	19q13.2	Yes	No
CEACAM8	CEA cell adhesion molecule 8	ENSG00000124469	19q13.2	Yes	Yes
CECR2	CECR2 histone acetyl-lysine reader	ENSG00000099954	22q11.1-q11.21	Yes	No
CELF6	CUGBP Elav-like family member 6	ENSG00000140488	15q23	No	Yes
CENPE	centromere protein E	ENSG00000138778	4q24	Yes	No
CENPL	centromere protein L	ENSG00000120334	1q25.1	Yes	No
CENPN	centromere protein N	ENSG00000166451	16q23.2	Yes	No
CEP104	centrosomal protein 104	ENSG00000116198	1p36.32	Yes	No
CEP112	centrosomal protein 112	ENSG00000154240	17q24.1	Yes	No
CEP131	centrosomal protein 131	ENSG00000141577	17q25.3	No	Yes
CEP152	centrosomal protein 152	ENSG00000103995	15q21.1	Yes	No
CEP170B	centrosomal protein 170B	ENSG00000099814	14q32.33	No	Yes
CEP290	centrosomal protein 290	ENSG00000198707	12q21.32	Yes	No
CEP57	centrosomal protein 57	ENSG00000166037	11q21	Yes	No
CEP63	centrosomal protein 63	ENSG00000182923	3q22.2	Yes	No
CES1	carboxylesterase 1	ENSG00000198848, ENSG00000262243	16q12.2	Yes	No
CES5A	carboxylesterase 5A	ENSG00000159398, ENSG00000261972	16q12.2	Yes	No
CFAP410	cilia and flagella associated protein 410	ENSG00000160226	21q22.3	No	Yes
CFAP43	cilia and flagella associated protein 43	ENSG00000197748	10q25.1	Yes	No
CFAP46	cilia and flagella associated protein 46	ENSG00000171811	10q26.3	No	Yes
CFAP65	cilia and flagella associated protein 65	ENSG00000181378	2q35	No	Yes
CFH	complement factor H	ENSG00000000971	1q31.3	Yes	No
CFHR1	complement factor H related 1	ENSG00000244414	1q31.3	Yes	Yes
CFHR2	complement factor H related 2	ENSG00000080910	1q31.3	Yes	No
CFHR3	complement factor H related 3	ENSG00000116785	1q31.3	Yes	No
CFHR4	complement factor H related 4	ENSG00000134365	1q31.3	Yes	Yes
CFHR5	complement factor H related 5	ENSG00000134389	1q31.3	Yes	No
CHD8	chromodomain helicase DNA binding protein 8	ENSG00000100888	14q11.2	Yes	No
CHEK1	checkpoint kinase 1	ENSG00000149554	11q24.2	Yes	No
CHEK2	checkpoint kinase 2	ENSG00000183765	22q12.1	Yes	No
CHEK2P2	checkpoint kinase 2 pseudogene 2	ENSG00000259156	15q11.1	No	Yes
CHKB	choline kinase beta	ENSG00000100288	22q13.33	Yes	No
CHMP2B	charged multivesicular body protein 2B	ENSG00000083937	3p11.2	Yes	No
CHODL	chondrolectin	ENSG00000154645	21q21.1	Yes	No
CHPF	chondroitin polymerizing factor	ENSG00000123989	2q35	No	Yes
CHPT1	choline phosphotransferase 1	ENSG00000111666	12q23.2	Yes	No
CHRD	chordin	ENSG00000090539	3q27.1	No	Yes
CHRNA7	cholinergic receptor nicotinic alpha 7 subunit	ENSG00000175344, ENSG00000274542, ENSG00000282088	15q13.3	Yes	No
CHST12	carbohydrate sulfotransferase 12	ENSG00000136213	7p22.3	No	Yes
CHUK	component of inhibitor of nuclear factor kappa B kinase complex	ENSG00000213341	10q24.31	Yes	No
CIP2A	cell proliferation regulating inhibitor of protein phosphatase 2A	ENSG00000163507	3q13.13	Yes	No
CKAP5	cytoskeleton associated protein 5	ENSG00000175216	11p11.2	Yes	No
CKB	creatine kinase B	ENSG00000166165	14q32.33	No	Yes
CLC	Charcot-Leyden crystal galectin	ENSG00000105205	19q13.2	Yes	No
CLCA2	chloride channel accessory 2	ENSG00000137975	1p22.3	Yes	No
CLCNKB	chloride voltage-gated channel Kb	ENSG00000184908	1p36.13	Yes	No
CLDN17	claudin 17	ENSG00000156282	21q21.3	No	Yes
CLDN8	claudin 8	ENSG00000156284	21q22.11	No	Yes
CLEC18B	C-type lectin domain family 18 member B	ENSG00000140839	16q23.1	Yes	Yes
CLEC18C	C-type lectin domain family 18 member C	ENSG00000157335	16q22.1	Yes	No
CLGN	calmegin	ENSG00000153132	4q31.1	Yes	No
CLIC3	chloride intracellular channel 3	ENSG00000169583	9q34.3	No	Yes
CLIC5	chloride intracellular channel 5	ENSG00000112782	6p21.1	No	Yes
CLOCK	clock circadian regulator	ENSG00000134852	4q12	Yes	No
CMAS	cytidine monophosphate N-acetylneuraminic acid synthetase	ENSG00000111726	12p12.1	Yes	No
CMC1	C-X9-C motif containing 1	ENSG00000187118	3p24.1	No	Yes
CNKSR2	connector enhancer of kinase suppressor of Ras 2	ENSG00000149970	Xp22.12	No	Yes
CNOT1	CCR4-NOT transcription complex subunit 1	ENSG00000125107	16q21	Yes	No
CNTLN	centlein	ENSG00000044459	9p22.2	Yes	No
CNTN1	contactin 1	ENSG00000018236	12q12	No	Yes
CNTN4	contactin 4	ENSG00000144619	3p26.3-p26.2	Yes	No
CNTN5	contactin 5	ENSG00000149972	11q22.1	No	Yes
CNTN6	contactin 6	ENSG00000134115	3p26.3	No	Yes
CNTNAP3B	contactin associated protein like 3B	ENSG00000154529	9p11.2	Yes	No
CNTNAP4	contactin associated protein like 4	ENSG00000152910	16q23.1	Yes	No
CNTRL	centriolin	ENSG00000119397	9q33.2	Yes	No
COA8	cytochrome c oxidase assembly factor 8	ENSG00000256053	14q32.33	No	Yes
COG5	component of oligomeric golgi complex 5	ENSG00000164597, ENSG00000284369	7q22.3	Yes	No
COG6	component of oligomeric golgi complex 6	ENSG00000133103	13q14.11	Yes	No
COL17A1	collagen type XVII alpha 1 chain	ENSG00000065618	10q25.1	Yes	No
COL18A1	collagen type XVIII alpha 1 chain	ENSG00000182871	21q22.3	Yes	Yes
COL27A1	collagen type XXVII alpha 1 chain	ENSG00000196739	9q32	Yes	Yes
COL6A3	collagen type VI alpha 3 chain	ENSG00000163359	2q37.3	No	Yes
COL6A5	collagen type VI alpha 5 chain	ENSG00000172752	3q22.1	Yes	No
COL9A2	collagen type IX alpha 2 chain	ENSG00000049089	1p34.2	No	Yes
COPB1	coatomer protein complex subunit beta 1	ENSG00000129083	11p15.2	Yes	No
COX11	cytochrome c oxidase copper chaperone COX11	ENSG00000166260	17q22	Yes	No
COX19	cytochrome c oxidase assembly factor COX19	ENSG00000240230	7p22.3	No	Yes
CPD	carboxypeptidase D	ENSG00000108582	17q11.2	Yes	No
CPTP	ceramide-1-phosphate transfer protein	ENSG00000224051	1p36.33	No	Yes
CPZ	carboxypeptidase Z	ENSG00000109625	4p16.1	Yes	No
CRACR2B	calcium release activated channel regulator 2B	ENSG00000177685	11p15.5	No	Yes
CRB2	crumbs cell polarity complex component 2	ENSG00000148204	9q33.3	No	Yes
CRBN	cereblon	ENSG00000113851	3p26.2	Yes	No
CRCT1	cysteine rich C-terminal 1	ENSG00000169509	1q21.3	Yes	No
CRELD1	cysteine rich with EGF like domains 1	ENSG00000163703	3p25.3	No	Yes
CRHR1	corticotropin releasing hormone receptor 1	ENSG00000120088, ENSG00000263715, ENSG00000282456, ENSG00000276191, ENSG00000278232	17q21.31	Yes	Yes
CRNKL1	crooked neck pre-mRNA splicing factor 1	ENSG00000101343	20p11.23	Yes	No
CROCC	ciliary rootlet coiled-coil, rootletin	ENSG00000058453	1p36.13	No	Yes
CROCC2	ciliary rootlet coiled-coil, rootletin family member 2	ENSG00000226321	2q37.3	No	Yes
CRPPA	CDP-L-ribitol pyrophosphorylase A	ENSG00000214960	7p21.2	Yes	No
CRYAA	crystallin alpha A	ENSG00000160202	21q22.3	Yes	No
CRYAA2	crystallin alpha A2	ENSG00000276076	21p12	Yes	No
CRYBA2	crystallin beta A2	ENSG00000163499	2q35	No	Yes
CSAG3	CSAG family member 3	ENSG00000268916	Xq28	Yes	No
CSE1L	chromosome segregation 1 like	ENSG00000124207	20q13.13	Yes	No
CSH1	chorionic somatomammotropin hormone 1	ENSG00000136488	17q23.3	No	Yes
CSMD3	CUB and Sushi multiple domains 3	ENSG00000164796	8q23.3	Yes	No
CSRNP3	cysteine and serine rich nuclear protein 3	ENSG00000178662	2q24.3	Yes	No
CT45A1	cancer/testis antigen family 45 member A1	ENSG00000268940	Xq26.3	Yes	No
CT45A3	cancer/testis antigen family 45 member A3	ENSG00000269096	Xq26.3	Yes	No
CTAGE1	cutaneous T cell lymphoma-associated antigen 1	ENSG00000212710, ENSG00000282841	18q11.2	Yes	No
CTAGE15	CTAGE family member 15	ENSG00000271079, ENSG00000285172	7q35	Yes	Yes
CTAGE4	CTAGE family member 4	ENSG00000225932, ENSG00000285322, ENSG00000288370	7q35	Yes	Yes
CTAGE8	CTAGE family member 8	ENSG00000244693, ENSG00000285175, ENSG00000288181	7q35	Yes	Yes
CTDP1	CTD phosphatase subunit 1	ENSG00000060069, ENSG00000282752	18q23	No	Yes
CTDSP1	CTD small phosphatase 1	ENSG00000144579	2q35	No	Yes
CTH	cystathionine gamma-lyase	ENSG00000116761	1p31.1	Yes	No
CUL4B	cullin 4B	ENSG00000158290	Xq24	Yes	No
CUL5	cullin 5	ENSG00000166266	11q22.3	Yes	No
CYHR1	cysteine and histidine rich 1	ENSG00000187954	8q24.3	No	Yes
CYLD	CYLD lysine 63 deubiquitinase	ENSG00000083799	16q12.1	Yes	No
CYP26C1	cytochrome P450 family 26 subfamily C member 1	ENSG00000187553	10q23.33	No	Yes
CYP2A6	cytochrome P450 family 2 subfamily A member 6	ENSG00000255974	19q13.2	Yes	Yes
CYP2A7	cytochrome P450 family 2 subfamily A member 7	ENSG00000198077	19q13.2	Yes	Yes
CYP2D6	cytochrome P450 family 2 subfamily D member 6	ENSG00000100197, ENSG00000272532, ENSG00000275211, ENSG00000280905, ENSG00000282966, ENSG00000283284	22q13.2	Yes	No
CYP2D7	cytochrome P450 family 2 subfamily D member 7 (gene/pseudogene)	ENSG00000205702, ENSG00000278088, ENSG00000263181, ENSG00000283008, ENSG00000283373	22q13.2	Yes	Yes
CYP2W1	cytochrome P450 family 2 subfamily W member 1	ENSG00000073067	7p22.3	No	Yes
CYP3A4	cytochrome P450 family 3 subfamily A member 4	ENSG00000160868	7q22.1	Yes	No
CYP3A7	cytochrome P450 family 3 subfamily A member 7	ENSG00000160870	7q22.1	Yes	No
CYP3A7-CYP3A51P	CYP3A7-CYP3A51P readthrough	ENSG00000282301	7q22.1	Yes	No
CYSRT1	cysteine rich tail 1	ENSG00000197191	9q34.3	No	Yes
DARS2	aspartyl-tRNA synthetase 2, mitochondrial	ENSG00000117593	1q25.1	Yes	No
DAZL	deleted in azoospermia like	ENSG00000092345	3p24.3	Yes	No
DDN	dendrin	ENSG00000181418	12q13.12	No	Yes
DDT	D-dopachrome tautomerase	ENSG00000099977, ENSG00000275003	22q11.23	No	Yes
DDX11L9	DEAD/H-box helicase 11 like 9	ENSG00000248472	15q26.3	Yes	No
DDX42	DEAD-box helicase 42	ENSG00000198231	17q23.3	Yes	No
DDX51	DEAD-box helicase 51	ENSG00000185163, ENSG00000288503	12q24.33	No	Yes
DEFB104A	defensin beta 104A	ENSG00000176782, ENSG00000285034	8p23.1	Yes	No
DEFB104B	defensin beta 104B	ENSG00000177023, ENSG00000277006, ENSG00000285356	8p23.1	Yes	No
DEFB106A	defensin beta 106A	ENSG00000186579, ENSG00000285617	8p23.1	Yes	No
DEFB106B	defensin beta 106B	ENSG00000187082, ENSG00000275794, ENSG00000284937	8p23.1	Yes	No
DEFB109A	defensin beta 109A (pseudogene)	NA	8p23.1	Yes	No
DEFB109B	defensin beta 109B	ENSG00000206034, ENSG00000284851	8p23.1	No	Yes
DEFB4A	defensin beta 4A	ENSG00000171711, ENSG00000275444, ENSG00000177257, ENSG00000285433, ENSG00000285181	8p23.1	Yes	No
DEGS2	delta 4-desaturase, sphingolipid 2	ENSG00000168350	14q32.2	No	Yes
DENND5A	DENN domain containing 5A	ENSG00000184014	11p15.4	Yes	No
DEPDC1	DEP domain containing 1	ENSG00000024526	1p31.3	No	Yes
DEPDC5	DEP domain containing 5, GATOR1 subcomplex subunit	ENSG00000100150	22q12.2-q12.3	Yes	No
DEPDC7	DEP domain containing 7	ENSG00000121690	11p13	Yes	No
DERL2	derlin 2	ENSG00000072849	17p13.2	Yes	No
DEUP1	deuterosome assembly protein 1	ENSG00000165325	11q21	Yes	No
DGKQ	diacylglycerol kinase theta	ENSG00000145214	4p16.3	Yes	Yes
DHRS4	dehydrogenase/reductase 4	ENSG00000157326, ENSG00000284807	14q11.2	Yes	No
DHRS4L2	dehydrogenase/reductase 4 like 2	ENSG00000187630	14q11.2	Yes	No
DIABLO	diablo IAP-binding mitochondrial protein	ENSG00000184047, ENSG00000284934	12q24.31	Yes	No
DICER1	dicer 1, ribonuclease III	ENSG00000100697	14q32.13	Yes	No
DIPK1B	divergent protein kinase domain 1B	ENSG00000165716	9q34.3	No	Yes
DIS3L	DIS3 like exosome 3'-5' exoribonuclease	ENSG00000166938	15q22.31	Yes	No
DISP1	dispatched RND transporter family member 1	ENSG00000154309	1q41	Yes	No
DMBT1	deleted in malignant brain tumors 1	ENSG00000187908	10q26.13	Yes	No
DMC1	DNA meiotic recombinase 1	ENSG00000100206	22q13.1	Yes	No
DMD	dystrophin	ENSG00000198947	Xp21.2-p21.1	Yes	No
DMRTB1	DMRT like family B with proline rich C-terminal 1	ENSG00000143006	1p32.3	No	Yes
DMRTC2	DMRT like family C2	ENSG00000142025	19q13.2	Yes	No
DNAAF1	dynein axonemal assembly factor 1	ENSG00000154099	16q24.1	Yes	No
DNAH1	dynein axonemal heavy chain 1	ENSG00000114841	3p21.1	No	Yes
DNAH12	dynein axonemal heavy chain 12	ENSG00000174844	3p14.3	Yes	No
DNAH14	dynein axonemal heavy chain 14	ENSG00000185842	1q42.12	Yes	No
DNAH6	dynein axonemal heavy chain 6	ENSG00000115423	2p11.2	Yes	No
DNAH8	dynein axonemal heavy chain 8	ENSG00000124721	6p21.2	Yes	No
DNAJB6	DnaJ heat shock protein family (Hsp40) member B6	ENSG00000105993	7q36.3	No	Yes
DNAJB7	DnaJ heat shock protein family (Hsp40) member B7	ENSG00000172404	22q13.2	Yes	No
DNLZ	DNL-type zinc finger	ENSG00000213221	9q34.3	No	Yes
DNM1L	dynamin 1 like	ENSG00000087470	12p11.21	Yes	No
DNM1P46	dynamin 1 pseudogene 46	ENSG00000182397	15q26.3	No	Yes
DNMT1	DNA methyltransferase 1	ENSG00000130816	19p13.2	Yes	No
DOCK7	dedicator of cytokinesis 7	ENSG00000116641	1p31.3	Yes	No
DOK7	docking protein 7	ENSG00000175920	4p16.3	Yes	Yes
DPH1	diphthamide biosynthesis 1	ENSG00000108963	17p13.3	No	Yes
DPM1	dolichyl-phosphate mannosyltransferase subunit 1, catalytic	ENSG00000000419	20q13.13	Yes	No
DPP7	dipeptidyl peptidase 7	ENSG00000176978	9q34.3	No	Yes
DPY19L1	dpy-19 like C-mannosyltransferase 1	ENSG00000173852	7p14.2	Yes	No
DPY19L2	dpy-19 like 2	ENSG00000177990	12q14.2	Yes	No
DPY19L2P2	DPY19L2 pseudogene 2	ENSG00000170629	7q22.1	Yes	No
DPY19L3	dpy-19 like C-mannosyltransferase 3	ENSG00000178904	19q13.11	Yes	No
DRD4	dopamine receptor D4	ENSG00000069696, ENSG00000276825	11p15.5	No	Yes
DRICH1	aspartate rich 1	ENSG00000189269	22q11.23	Yes	No
DSC2	desmocollin 2	ENSG00000134755	18q12.1	Yes	No
DSC3	desmocollin 3	ENSG00000134762	18q12.1	Yes	No
DSCC1	DNA replication and sister chromatid cohesion 1	ENSG00000136982	8q24.12	Yes	No
DSEL	dermatan sulfate epimerase like	ENSG00000171451, ENSG00000262102	18q22.1	No	Yes
DSG1	desmoglein 1	ENSG00000134760	18q12.1	Yes	No
DSG2	desmoglein 2	ENSG00000046604	18q12.1	Yes	No
DST	dystonin	ENSG00000151914	6p12.1	Yes	No
DTX1	deltex E3 ubiquitin ligase 1	ENSG00000135144	12q24.13	No	Yes
DTX4	deltex E3 ubiquitin ligase 4	ENSG00000110042	11q12.1	No	Yes
DUS1L	dihydrouridine synthase 1 like	ENSG00000169718	17q25.3	No	Yes
DUSP28	dual specificity phosphatase 28	ENSG00000188542	2q37.3	No	Yes
DVL1	dishevelled segment polarity protein 1	ENSG00000107404	1p36.33	No	Yes
DYM	dymeclin	ENSG00000141627	18q21.1	Yes	No
DYNC2H1	dynein cytoplasmic 2 heavy chain 1	ENSG00000187240	11q22.3	Yes	No
DZIP3	DAZ interacting zinc finger protein 3	ENSG00000198919	3q13.13	Yes	No
EAF1	ELL associated factor 1	ENSG00000144597	3p25.1	Yes	No
EAF2	ELL associated factor 2	ENSG00000145088	3q13.33	Yes	No
ECEL1	endothelin converting enzyme like 1	ENSG00000171551	2q37.1	No	Yes
ECT2	epithelial cell transforming 2	ENSG00000114346	3q26.31	Yes	No
EDF1	endothelial differentiation related factor 1	ENSG00000107223	9q34.3	No	Yes
EDRF1	erythroid differentiation regulatory factor 1	ENSG00000107938	10q26.2	Yes	No
EEF1A2	eukaryotic translation elongation factor 1 alpha 2	ENSG00000101210	20q13.33	No	Yes
EEF1AKMT4	EEF1A lysine methyltransferase 4	ENSG00000284753	3q27.1	No	Yes
EEF1AKMT4-ECE2	EEF1AKMT4-ECE2 readthrough	ENSG00000284917	3q27.1	No	Yes
EEF1D	eukaryotic translation elongation factor 1 delta	ENSG00000104529, ENSG00000273594	8q24.3	No	Yes
EFCAB13	EF-hand calcium binding domain 13	ENSG00000178852	17q21.32	Yes	No
EFCAB5	EF-hand calcium binding domain 5	ENSG00000176927	17q11.2	Yes	No
EFCAB6	EF-hand calcium binding domain 6	ENSG00000186976	22q13.2-q13.31	Yes	No
EFCAB7	EF-hand calcium binding domain 7	ENSG00000203965	1p31.3	Yes	No
EGFL7	EGF like domain multiple 7	ENSG00000172889	9q34.3	No	Yes
EGLN1	egl-9 family hypoxia inducible factor 1	ENSG00000135766	1q42.2	Yes	No
EGR4	early growth response 4	ENSG00000135625	2p13.2	No	Yes
EIF2AK3	eukaryotic translation initiation factor 2 alpha kinase 3	ENSG00000172071	2p11.2	Yes	No
EIF2S3B	eukaryotic translation initiation factor 2 subunit gamma B	ENSG00000180574	12p13.2	Yes	No
EIF3M	eukaryotic translation initiation factor 3 subunit M	ENSG00000149100	11p13	Yes	No
EIF4ENIF1	eukaryotic translation initiation factor 4E nuclear import factor 1	ENSG00000184708	22q12.2	Yes	No
ELK2AP	ETS transcription factor ELK2A, pseudogene	NA	14q32.33	Yes	No
ELOA2	elongin A2	ENSG00000206181	18q21.1	Yes	No
ELOA3	elongin A3	ENSG00000274744	18q21.1	Yes	No
ELOA3B	elongin A3 family member B	ENSG00000278674	18q21.1	Yes	No
ELOA3C	elongin A3 family member C	ENSG00000275553	18q21.1	Yes	No
ELOA3D	elongin A3 family member D	ENSG00000183791	18q21.1	Yes	No
ELP2	elongator acetyltransferase complex subunit 2	ENSG00000134759	18q12.2	Yes	No
EME2	essential meiotic structure-specific endonuclease subunit 2	ENSG00000197774	16p13.3	No	Yes
EMX1	empty spiracles homeobox 1	ENSG00000135638	2p13.2	No	Yes
ENPP1	ectonucleotide pyrophosphatase/phosphodiesterase 1	ENSG00000197594	6q23.2	Yes	No
ENPP4	ectonucleotide pyrophosphatase/phosphodiesterase 4	ENSG00000001561	6p21.1	No	Yes
ENPP5	ectonucleotide pyrophosphatase/phosphodiesterase family member 5	ENSG00000112796	6p21.1	No	Yes
ENTHD1	ENTH domain containing 1	ENSG00000176177	22q13.1	Yes	No
ENTPD2	ectonucleoside triphosphate diphosphohydrolase 2	ENSG00000054179	9q34.3	No	Yes
ENTPD8	ectonucleoside triphosphate diphosphohydrolase 8	ENSG00000188833	9q34.3	No	Yes
EP300	E1A binding protein p300	ENSG00000100393	22q13.2	Yes	No
EP400	E1A binding protein p400	ENSG00000183495	12q24.33	No	Yes
EPB41	erythrocyte membrane protein band 4.1	ENSG00000159023	1p35.3	Yes	No
EPCAM	epithelial cell adhesion molecule	ENSG00000119888	2p21	Yes	No
EPHA7	EPH receptor A7	ENSG00000135333	6q16.1	No	Yes
EPS15L1	epidermal growth factor receptor pathway substrate 15 like 1	ENSG00000127527	19p13.11	Yes	No
ERAP1	endoplasmic reticulum aminopeptidase 1	ENSG00000164307	5q15	Yes	No
ERCC4	ERCC excision repair 4, endonuclease catalytic subunit	ENSG00000175595	16p13.12	Yes	No
ERCC6	ERCC excision repair 6, chromatin remodeling factor	ENSG00000225830	10q11.23	Yes	No
ERCC8	ERCC excision repair 8, CSA ubiquitin ligase complex subunit	ENSG00000049167	5q12.1	Yes	No
ERFE	erythroferrone	ENSG00000178752	2q37.3	Yes	Yes
ERI2	ERI1 exoribonuclease family member 2	ENSG00000196678	16p12.3	Yes	No
ESCO2	establishment of sister chromatid cohesion N-acetyltransferase 2	ENSG00000171320	8p21.1	Yes	No
ESF1	ESF1 nucleolar pre-rRNA processing protein homolog	ENSG00000089048	20p12.1	Yes	No
ESPNL	espin like	ENSG00000144488	2q37.3	Yes	Yes
ESPNP	espin pseudogene	NA	1p36.13	Yes	Yes
ESRRA	estrogen related receptor alpha	ENSG00000173153	11q13.1	Yes	No
ETFA	electron transfer flavoprotein subunit alpha	ENSG00000140374	15q24.2-q24.3	Yes	No
EVA1B	eva-1 homolog B	ENSG00000142694	1p34.3	No	Yes
EVI2A	ecotropic viral integration site 2A	ENSG00000126860	17q11.2	Yes	No
EVI2B	ecotropic viral integration site 2B	ENSG00000185862	17q11.2	Yes	No
EVI5L	ecotropic viral integration site 5 like	ENSG00000142459	19p13.2	No	Yes
EVL	Enah/Vasp-like	ENSG00000196405	14q32.2	No	Yes
EVX1	even-skipped homeobox 1	ENSG00000106038	7p15.2	No	Yes
EVX2	even-skipped homeobox 2	ENSG00000174279	2q31.1	No	Yes
EXD3	exonuclease 3'-5' domain containing 3	ENSG00000187609	9q34.3	No	Yes
EXOC3L4	exocyst complex component 3 like 4	ENSG00000205436	14q32.32	No	Yes
EXOC8	exocyst complex component 8	ENSG00000116903	1q42.2	Yes	No
EZH1	enhancer of zeste 1 polycomb repressive complex 2 subunit	ENSG00000108799	17q21.2	Yes	No
F12	coagulation factor XII	ENSG00000131187	5q35.3	No	Yes
F13B	coagulation factor XIII B chain	ENSG00000143278	1q31.3	Yes	No
F5	coagulation factor V	ENSG00000198734	1q24.2	Yes	No
F7	coagulation factor VII	ENSG00000057593	13q34	No	Yes
FAHD1	fumarylacetoacetate hydrolase domain containing 1	ENSG00000180185	16p13.3	Yes	No
FAM106A	family with sequence similarity 106 member A	ENSG00000273018	17p11.2	Yes	Yes
FAM106C	family with sequence similarity 106 member C	ENSG00000188933, ENSG00000288235	17p11.2	Yes	No
FAM126A	family with sequence similarity 126 member A	ENSG00000122591	7p15.3	Yes	No
FAM131C	family with sequence similarity 131 member C	ENSG00000185519	1p36.13	Yes	No
FAM166A	family with sequence similarity 166 member A	ENSG00000188163	9q34.3	No	Yes
FAM227A	family with sequence similarity 227 member A	ENSG00000184949	22q13.1	Yes	No
FAM230E	family with sequence similarity 230 member E	ENSG00000182824	22q11.21	No	Yes
FAM230F	family with sequence similarity 230 member F	NA	22q11.21	Yes	Yes
FAM30A	family with sequence similarity 30 member A	ENSG00000226777, ENSG00000277059	14q32.33	Yes	No
FAM66A	family with sequence similarity 66 member A	NA	8p23.1	Yes	No
FAM86B1	family with sequence similarity 86 member B1	ENSG00000186523	8p23.1	Yes	No
FAM86B2	family with sequence similarity 86 member B2	ENSG00000145002, ENSG00000285397	8p23.1	Yes	No
FAM90A25P	family with sequence similarity 90 member A25, pseudogene	NA	8p23.1	Yes	No
FAM90A26	family with sequence similarity 90 member A26	ENSG00000229924	4p16.1	Yes	No
FAM92B	family with sequence similarity 92 member B	ENSG00000153789	16q24.1	No	Yes
FANCB	FA complementation group B	ENSG00000181544	Xp22.2	Yes	No
FANCD2	FA complementation group D2	ENSG00000144554	3p25.3	Yes	No
FANCI	FA complementation group I	ENSG00000140525	15q26.1	Yes	No
FANCL	FA complementation group L	ENSG00000115392	2p16.1	Yes	No
FANCM	FA complementation group M	ENSG00000187790	14q21.2	Yes	No
FAS	Fas cell surface death receptor	ENSG00000026103	10q23.31	Yes	No
FASN	fatty acid synthase	ENSG00000169710	17q25.3	No	Yes
FASTK	Fas activated serine/threonine kinase	ENSG00000164896	7q36.1	No	Yes
FASTKD2	FAST kinase domains 2	ENSG00000118246	2q33.3	Yes	No
FBRSL1	fibrosin like 1	ENSG00000112787	12q24.33	No	Yes
FBXO41	F-box protein 41	ENSG00000163013	2p13.2	No	Yes
FBXO47	F-box protein 47	ENSG00000204952	17q12	Yes	No
FBXW5	F-box and WD repeat domain containing 5	ENSG00000159069	9q34.3	No	Yes
FCGBP	Fc fragment of IgG binding protein	ENSG00000275395, ENSG00000281123	19q13.2	Yes	Yes
FCGR1B	Fc fragment of IgG receptor Ib	ENSG00000198019	1p11.2	Yes	No
FCGR2C	Fc fragment of IgG receptor IIc (gene/pseudogene)	ENSG00000143226	1q23.3	Yes	No
FCGR3A	Fc fragment of IgG receptor IIIa	ENSG00000203747	1q23.3	Yes	No
FCGR3B	Fc fragment of IgG receptor IIIb	ENSG00000162747	1q23.3	Yes	No
FES	FES proto-oncogene, tyrosine kinase	ENSG00000182511	15q26.1	No	Yes
FEV	FEV transcription factor, ETS family member	ENSG00000163497	2q35	Yes	Yes
FGFR3	fibroblast growth factor receptor 3	ENSG00000068078	4p16.3	Yes	Yes
FGFRL1	fibroblast growth factor receptor like 1	ENSG00000127418	4p16.3	Yes	Yes
FIBCD1	fibrinogen C domain containing 1	ENSG00000130720	9q34.12	No	Yes
FIG4	FIG4 phosphoinositide 5-phosphatase	ENSG00000112367	6q21	Yes	No
FIZ1	FLT3 interacting zinc finger 1	ENSG00000179943	19q13.42	No	Yes
FKBP3	FKBP prolyl isomerase 3	ENSG00000100442	14q21.2	Yes	No
FKBP7	FKBP prolyl isomerase 7	ENSG00000079150	2q31.2	Yes	No
FKBP9	FKBP prolyl isomerase 9	ENSG00000122642	7p14.3	No	Yes
FKTN	fukutin	ENSG00000106692	9q31.2	Yes	No
FLT4	fms related tyrosine kinase 4	ENSG00000037280	5q35.3	No	Yes
FLVCR1	feline leukemia virus subgroup C cellular receptor 1	ENSG00000162769	1q32.3	Yes	No
FNDC10	fibronectin type III domain containing 10	ENSG00000228594	1p36.33	No	Yes
FNDC11	fibronectin type III domain containing 11	ENSG00000125531	20q13.33	No	Yes
FOXC1	forkhead box C1	ENSG00000054598	6p25.3	No	Yes
FOXD3	forkhead box D3	ENSG00000187140	1p31.3	Yes	No
FOXD4	forkhead box D4	ENSG00000170122	9p24.3	Yes	No
FOXD4L1	forkhead box D4 like 1	ENSG00000184492	2q14.1	Yes	Yes
FOXF2	forkhead box F2	ENSG00000137273	6p25.3	No	Yes
FOXH1	forkhead box H1	ENSG00000160973	8q24.3	No	Yes
FOXK1	forkhead box K1	ENSG00000164916	7p22.1	No	Yes
FOXP2	forkhead box P2	ENSG00000128573	7q31.1	No	Yes
FOXQ1	forkhead box Q1	ENSG00000164379	6p25.3	No	Yes
FRG1BP	FSHD region gene 1 family member B, pseudogene	NA	20q11.1	Yes	No
FRMPD2	FERM and PDZ domain containing 2	ENSG00000170324	10q11.22	Yes	No
FRRS1	ferric chelate reductase 1	ENSG00000156869	1p21.2	Yes	No
FRYL	FRY like transcription coactivator	ENSG00000075539	4p11	Yes	No
FSHR	follicle stimulating hormone receptor	ENSG00000170820	2p16.3	Yes	No
FSIP2	fibrous sheath interacting protein 2	ENSG00000188738	2q32.1	No	Yes
FTO	FTO alpha-ketoglutarate dependent dioxygenase	ENSG00000140718	16q12.2	Yes	No
FUCA1	alpha-L-fucosidase 1	ENSG00000179163	1p36.11	Yes	No
FURIN	furin, paired basic amino acid cleaving enzyme	ENSG00000140564	15q26.1	No	Yes
FUT7	fucosyltransferase 7	ENSG00000180549	9q34.3	No	Yes
FZD2	frizzled class receptor 2	ENSG00000180340	17q21.31	Yes	No
GABRQ	gamma-aminobutyric acid type A receptor theta subunit	ENSG00000268089	Xq28	Yes	No
GAGE12C	G antigen 12C	ENSG00000237671	Xp11.23	Yes	No
GAGE12D	G antigen 12D	ENSG00000227488	Xp11.23	Yes	No
GAGE12E	G antigen 12E	ENSG00000216649	Xp11.23	Yes	No
GAGE12H	G antigen 12H	ENSG00000224902	Xp11.23	Yes	No
GAGE12J	G antigen 12J	ENSG00000224659	Xp11.23	Yes	No
GAGE13	G antigen 13	ENSG00000274274	Xp11.23	Yes	No
GAGE2A	G antigen 2A	ENSG00000189064	Xp11.23	Yes	No
GAGE2B	G antigen 2B	ENSG00000189064	Xp11.23	Yes	No
GAGE2C	G antigen 2C	ENSG00000236362	Xp11.23	Yes	No
GAGE2D	G antigen 2D	ENSG00000236362	Xp11.23	Yes	No
GAGE2E	G antigen 2E	ENSG00000224659	Xp11.23	Yes	No
GAGE8	G antigen 8	ENSG00000189064	Xp11	Yes	No
GAL3ST4	galactose-3-O-sulfotransferase 4	ENSG00000197093	7q22.1	Yes	No
GALK1	galactokinase 1	ENSG00000108479	17q25.1	No	Yes
GALM	galactose mutarotase	ENSG00000143891	2p22.1	Yes	No
GALNT3	polypeptide N-acetylgalactosaminyltransferase 3	ENSG00000115339	2q24.3	Yes	No
GALNT9	polypeptide N-acetylgalactosaminyltransferase 9	ENSG00000182870, ENSG00000288490	12q24.33	No	Yes
GAN	gigaxonin	ENSG00000261609	16q23.2	Yes	No
GANC	glucosidase alpha, neutral C	ENSG00000214013	15q15.1	Yes	No
GAPVD1	GTPase activating protein and VPS9 domains 1	ENSG00000165219	9q33.3	Yes	No
GARS	NA	NA	NA	Yes	No
GAS2L1	growth arrest specific 2 like 1	ENSG00000185340	22q12.2	No	Yes
GAS6	growth arrest specific 6	ENSG00000183087	13q34	No	Yes
GATA3	GATA binding protein 3	ENSG00000107485	10p14	No	Yes
GATA6	GATA binding protein 6	ENSG00000141448	18q11.2	Yes	No
GATM	glycine amidinotransferase	ENSG00000171766	15q21.1	Yes	No
GBAP1	glucosylceramidase beta pseudogene 1	ENSG00000160766	1q22	No	Yes
GBX2	gastrulation brain homeobox 2	ENSG00000168505	2q37.2	No	Yes
GCSH	glycine cleavage system protein H	ENSG00000140905	16q23.2	Yes	No
GDE1	glycerophosphodiester phosphodiesterase 1	ENSG00000006007	16p12.3	Yes	No
GFER	growth factor, augmenter of liver regeneration	ENSG00000127554	16p13.3	No	Yes
GFPT1	glutamine--fructose-6-phosphate transaminase 1	ENSG00000198380	2p13.3	Yes	No
GGPS1	geranylgeranyl diphosphate synthase 1	ENSG00000152904	1q42.3	Yes	No
GGT2	gamma-glutamyltransferase 2	ENSG00000133475	22q11.21	Yes	No
GGT3P	gamma-glutamyltransferase 3 pseudogene	ENSG00000197421	22q11.21	No	Yes
GGTLC3	gamma-glutamyltransferase light chain family member 3	ENSG00000274252	22q11.21	Yes	No
GH2	growth hormone 2	ENSG00000136487	17q23.3	No	Yes
GJC2	gap junction protein gamma 2	ENSG00000198835	1q42.13	No	Yes
GKAP1	G kinase anchoring protein 1	ENSG00000165113	9q21.32	Yes	No
GLIS1	GLIS family zinc finger 1	ENSG00000174332	1p32.3	No	Yes
GLMN	glomulin, FKBP associated protein	ENSG00000174842	1p22.1	Yes	No
GMDS	GDP-mannose 4,6-dehydratase	ENSG00000112699	6p25.3	No	Yes
GMEB2	glucocorticoid modulatory element binding protein 2	ENSG00000101216	20q13.33	No	Yes
GNAI3	G protein subunit alpha i3	ENSG00000065135	1p13.3	Yes	No
GNAT2	G protein subunit alpha transducin 2	ENSG00000134183	1p13.3	Yes	No
GNG4	G protein subunit gamma 4	ENSG00000168243, ENSG00000282972	1q42.3	Yes	No
GNPAT	glyceronephosphate O-acyltransferase	ENSG00000116906	1q42.2	Yes	No
GNPTAB	N-acetylglucosamine-1-phosphate transferase subunits alpha and beta	ENSG00000111670	12q23.2	Yes	No
GOLGA6B	golgin A6 family member B	ENSG00000215186	15q24.1	Yes	No
GOLGA6D	golgin A6 family member D	ENSG00000140478	15q24.2	Yes	No
GOLGA6L3	golgin A6 family like 3	ENSG00000188388	15q25.3	Yes	No
GOLGA6L6	golgin A6 family like 6	ENSG00000277322	15q11.2	Yes	No
GOLGA8A	golgin A8 family member A	ENSG00000175265	15q14	No	Yes
GOLGA8B	golgin A8 family member B	ENSG00000215252	15q14	No	Yes
GOLGA8EP	golgin A8 family member E, pseudogene	NA	15q11.2	Yes	No
GOLGA8F	golgin A8 family member F	ENSG00000153684, ENSG00000276896, ENSG00000278310	15q13.1	Yes	No
GOLGA8G	golgin A8 family member G	ENSG00000183629, ENSG00000273651, ENSG00000277090	15q13.1	Yes	No
GOLGA8H	golgin A8 family member H	ENSG00000261794	15q13.2	Yes	No
GOLGA8J	golgin A8 family member J	ENSG00000179938, ENSG00000278119, ENSG00000283465	15q13.2	Yes	No
GOLGA8K	golgin A8 family member K	ENSG00000249931, ENSG00000261247, ENSG00000284076	15q13.3	Yes	No
GOLGA8O	golgin A8 family member O	ENSG00000206127, ENSG00000178115, ENSG00000282773	15q13.3	Yes	No
GOLGA8Q	golgin A8 family member Q	ENSG00000178115, ENSG00000282773	15q13.2	Yes	No
GOLGA8S	golgin A8 family member S	ENSG00000261739	15q11.2	Yes	No
GOLGA8T	golgin A8 family member T	ENSG00000261247, ENSG00000284076	15q13.2	Yes	No
GON4L	gon-4 like	ENSG00000116580	1q22	Yes	No
GOSR1	golgi SNAP receptor complex member 1	ENSG00000108587	17q11.2	Yes	No
GPAM	glycerol-3-phosphate acyltransferase, mitochondrial	ENSG00000119927	10q25.2	Yes	No
GPATCH8	G-patch domain containing 8	ENSG00000186566	17q21.31	Yes	No
GPC1	glypican 1	ENSG00000063660	2q37.3	No	Yes
GPC2	glypican 2	ENSG00000213420	7q22.1	Yes	No
GPER1	G protein-coupled estrogen receptor 1	ENSG00000164850	7p22.3	No	Yes
GPR143	G protein-coupled receptor 143	ENSG00000101850	Xp22.2	No	Yes
GPR146	G protein-coupled receptor 146	ENSG00000164849	7p22.3	No	Yes
GPR182	G protein-coupled receptor 182	ENSG00000166856	12q13.3	Yes	No
GPR22	G protein-coupled receptor 22	ENSG00000172209, ENSG00000283812	7q22.3	Yes	No
GPR34	G protein-coupled receptor 34	ENSG00000171659	Xp11.4	Yes	No
GPR78	G protein-coupled receptor 78	ENSG00000155269	4p16.1	Yes	No
GPR82	G protein-coupled receptor 82	ENSG00000171657	Xp11.4	Yes	No
GPRC6A	G protein-coupled receptor class C group 6 member A	ENSG00000173612	6q22.1	Yes	No
GPSM2	G protein signaling modulator 2	ENSG00000121957	1p13.3	Yes	No
GPT	glutamic--pyruvic transaminase	ENSG00000167701	8q24.3	No	Yes
GRIA2	glutamate ionotropic receptor AMPA type subunit 2	ENSG00000120251	4q32.1	No	Yes
GRIFIN	galectin-related inter-fiber protein	ENSG00000275572	7p22.3	No	Yes
GRIK2	glutamate ionotropic receptor kainate type subunit 2	ENSG00000164418	6q16.3	No	Yes
GRIN1	glutamate ionotropic receptor NMDA type subunit 1	ENSG00000176884	9q34.3	No	Yes
GRIN2C	glutamate ionotropic receptor NMDA type subunit 2C	ENSG00000161509	17q25.1	No	Yes
GRIN3B	glutamate ionotropic receptor NMDA type subunit 3B	ENSG00000116032	19p13.3	No	Yes
GRK3	G protein-coupled receptor kinase 3	ENSG00000100077	22q12.1	Yes	No
GSDMD	gasdermin D	ENSG00000104518, ENSG00000278718	8q24.3	No	Yes
GSE1	Gse1 coiled-coil protein	ENSG00000131149	16q24.1	No	Yes
GSPT1	G1 to S phase transition 1	ENSG00000103342	16p13.13	Yes	No
GSTM1	glutathione S-transferase mu 1	ENSG00000134184	1p13.3	Yes	Yes
GSTT1	glutathione S-transferase theta 1	ENSG00000277656	22q11.23	No	Yes
GSTT2	glutathione S-transferase theta 2 (gene/pseudogene)	ENSG00000099984, ENSG00000277897	22q11.23	Yes	No
GSTT2B	glutathione S-transferase theta 2B (gene/pseudogene)	ENSG00000133433, ENSG00000278695	22q11.23	Yes	No
GSTT4	glutathione S-transferase theta 4	ENSG00000276950, ENSG00000281748	22q11.23	Yes	No
GSX1	GS homeobox 1	ENSG00000169840	13q12.2	No	Yes
GTF2H2	general transcription factor IIH subunit 2	ENSG00000145736, ENSG00000276910, ENSG00000275045	5q13.2	Yes	No
GTF2I	general transcription factor IIi	ENSG00000263001	7q11.23	Yes	No
GTPBP3	GTP binding protein 3, mitochondrial	ENSG00000130299	19p13.11	Yes	No
GUK1	guanylate kinase 1	ENSG00000143774	1q42.13	No	Yes
GXYLT1	glucoside xylosyltransferase 1	ENSG00000151233	12q12	Yes	No
GYG2P1	glycogenin 2 pseudogene 1	ENSG00000206159	Yq11.221	No	Yes
GYS2	glycogen synthase 2	ENSG00000111713	12p12.1	Yes	No
H3.Y	NA	NA	NA	Yes	No
HADHA	hydroxyacyl-CoA dehydrogenase trifunctional multienzyme complex subunit alpha	ENSG00000084754	2p23.3	Yes	No
HADHB	hydroxyacyl-CoA dehydrogenase trifunctional multienzyme complex subunit beta	ENSG00000138029	2p23.3	Yes	No
HAUS2	HAUS augmin like complex subunit 2	ENSG00000137814	15q15.2	Yes	No
HAUS3	HAUS augmin like complex subunit 3	ENSG00000214367	4p16.3	Yes	No
HDAC4	histone deacetylase 4	ENSG00000068024	2q37.3	Yes	Yes
HDAC7	histone deacetylase 7	ENSG00000061273	12q13.11	No	Yes
HEATR4	HEAT repeat containing 4	ENSG00000187105	14q24.3	Yes	Yes
HEBP1	heme binding protein 1	ENSG00000013583	12p13.1	No	Yes
HELZ	helicase with zinc finger	ENSG00000198265	17q24.2	Yes	No
HELZ2	helicase with zinc finger 2	ENSG00000130589	20q13.33	No	Yes
HERC2	HECT and RLD domain containing E3 ubiquitin protein ligase 2	ENSG00000128731, ENSG00000277278, ENSG00000276802	15q13.1	No	Yes
HERC2P3	hect domain and RLD 2 pseudogene 3	ENSG00000180229	15q11.1-q11.2	Yes	Yes
HERC2P7	hect domain and RLD 2 pseudogene 7	NA	15q11.2	Yes	No
HERC2P9	hect domain and RLD 2 pseudogene 9	ENSG00000206149	15q13.1	Yes	Yes
HES6	hes family bHLH transcription factor 6	ENSG00000144485	2q37.3	No	Yes
HGFAC	HGF activator	ENSG00000109758	4p16.3	Yes	Yes
HGS	hepatocyte growth factor-regulated tyrosine kinase substrate	ENSG00000185359	17q25.3	No	Yes
HIC1	HIC ZBTB transcriptional repressor 1	ENSG00000177374	17p13.3	No	Yes
HIP1R	huntingtin interacting protein 1 related	ENSG00000130787	12q24.31	No	Yes
HIST1H1B	NA	NA	NA	No	Yes
HIST1H1D	NA	NA	NA	No	Yes
HIST1H2AD	NA	NA	NA	No	Yes
HIST1H2AE	NA	NA	NA	No	Yes
HIST1H2AG	NA	NA	NA	No	Yes
HIST1H2AH	NA	NA	NA	No	Yes
HIST1H2AK	NA	NA	NA	No	Yes
HIST1H2AL	NA	NA	NA	No	Yes
HIST1H2AM	NA	NA	NA	No	Yes
HIST1H2BD	NA	NA	NA	No	Yes
HIST1H2BE	NA	NA	NA	No	Yes
HIST1H2BF	NA	NA	NA	No	Yes
HIST1H2BG	NA	NA	NA	No	Yes
HIST1H2BH	NA	NA	NA	No	Yes
HIST1H2BI	NA	NA	NA	No	Yes
HIST1H2BJ	NA	NA	NA	No	Yes
HIST1H2BK	NA	NA	NA	No	Yes
HIST1H2BN	NA	NA	NA	No	Yes
HIST1H2BO	NA	NA	NA	No	Yes
HIST1H3D	NA	NA	NA	No	Yes
HIST1H3E	NA	NA	NA	No	Yes
HIST1H3F	NA	NA	NA	No	Yes
HIST1H3G	NA	NA	NA	No	Yes
HIST1H3I	NA	NA	NA	No	Yes
HIST1H3J	NA	NA	NA	No	Yes
HIST1H4D	NA	NA	NA	No	Yes
HIST1H4E	NA	NA	NA	No	Yes
HIST1H4F	NA	NA	NA	No	Yes
HIST1H4G	NA	NA	NA	No	Yes
HIST1H4I	NA	NA	NA	No	Yes
HIST1H4L	NA	NA	NA	No	Yes
HLA-A	major histocompatibility complex, class I, A	ENSG00000206503, ENSG00000223980, ENSG00000231834, ENSG00000229215, ENSG00000206505, ENSG00000224320, ENSG00000235657, ENSG00000227715	6p22.1	Yes	Yes
HLA-B	major histocompatibility complex, class I, B	ENSG00000234745, ENSG00000228964, ENSG00000223532, ENSG00000232126, ENSG00000206450, ENSG00000224608	6p21.33	Yes	Yes
HLA-C	major histocompatibility complex, class I, C	ENSG00000204525, ENSG00000206435, ENSG00000233841, ENSG00000225691, ENSG00000206452, ENSG00000228299, ENSG00000237022	6p21.33	Yes	Yes
HLA-DQA1	major histocompatibility complex, class II, DQ alpha 1	ENSG00000196735, ENSG00000223793, ENSG00000228284, ENSG00000206301, ENSG00000206305, ENSG00000225103, ENSG00000237541, ENSG00000257473, ENSG00000232062, ENSG00000231526, ENSG00000236418, ENSG00000233192, ENSG00000225890, ENSG00000231823	6p21.32	Yes	Yes
HLA-DQA2	major histocompatibility complex, class II, DQ alpha 2	ENSG00000237541, ENSG00000223793, ENSG00000206301, ENSG00000225103, ENSG00000257473, ENSG00000231526, ENSG00000233192, ENSG00000231823	6p21.32	No	Yes
HLA-DQB1	major histocompatibility complex, class II, DQ beta 1	ENSG00000179344, ENSG00000231286, ENSG00000206302, ENSG00000206237, ENSG00000231939, ENSG00000233209, ENSG00000225824	6p21.32	Yes	Yes
HLA-DRA	major histocompatibility complex, class II, DR alpha	ENSG00000204287, ENSG00000230726, ENSG00000206308, ENSG00000227993, ENSG00000234794, ENSG00000228987, ENSG00000226260	6p21.32	No	Yes
HLA-DRB1	major histocompatibility complex, class II, DR beta 1	ENSG00000196126, ENSG00000206306, ENSG00000206240, ENSG00000228080, ENSG00000236884, ENSG00000229074	6p21.32	Yes	Yes
HLA-DRB5	major histocompatibility complex, class II, DR beta 5	ENSG00000198502	6p21.32	Yes	Yes
HLA-H	major histocompatibility complex, class I, H (pseudogene)	NA	6p22.1	No	Yes
HMCN1	hemicentin 1	ENSG00000143341	1q25.3-q31.1	Yes	No
HMCN2	hemicentin 2	ENSG00000148357	9q34.11	No	Yes
HMX1	H6 family homeobox 1	ENSG00000215612, ENSG00000288204	4p16.1	Yes	No
HMX2	H6 family homeobox 2	ENSG00000188816	10q26.13	No	Yes
HMX3	H6 family homeobox 3	ENSG00000188620	10q26.13	No	Yes
HNRNPCL1	heterogeneous nuclear ribonucleoprotein C like 1	ENSG00000179172, ENSG00000282175	1p36.21	Yes	No
HNRNPCL2	heterogeneous nuclear ribonucleoprotein C like 2	ENSG00000275774, ENSG00000274109, ENSG00000282530, ENSG00000283370	1p36.21	Yes	No
HNRNPCL3	heterogeneous nuclear ribonucleoprotein C like 3	ENSG00000277058, ENSG00000282559, ENSG00000283292	1p36.21	Yes	No
HNRNPCL4	heterogeneous nuclear ribonucleoprotein C like 4	ENSG00000179412, ENSG00000273865, ENSG00000282095, ENSG00000283231	1p36.21	Yes	No
HNRNPM	heterogeneous nuclear ribonucleoprotein M	ENSG00000099783	19p13.2	Yes	No
HORMAD1	HORMA domain containing 1	ENSG00000143452	1q21.3	Yes	No
HORMAD2	HORMA domain containing 2	ENSG00000176635	22q12.2	Yes	No
HOXA13	homeobox A13	ENSG00000106031	7p15.2	No	Yes
HOXD1	homeobox D1	ENSG00000128645	2q31.1	No	Yes
HOXD10	homeobox D10	ENSG00000128710	2q31.1	No	Yes
HOXD11	homeobox D11	ENSG00000128713	2q31.1	No	Yes
HOXD12	homeobox D12	ENSG00000170178	2q31.1	No	Yes
HOXD13	homeobox D13	ENSG00000128714	2q31.1	No	Yes
HOXD3	homeobox D3	ENSG00000128652	2q31.1	No	Yes
HOXD4	homeobox D4	ENSG00000170166	2q31.1	No	Yes
HOXD8	homeobox D8	ENSG00000175879	2q31.1	No	Yes
HOXD9	homeobox D9	ENSG00000128709	2q31.1	No	Yes
HPS5	HPS5 biogenesis of lysosomal organelles complex 2 subunit 2	ENSG00000110756, ENSG00000288445	11p15.1	Yes	No
HSBP1L1	heat shock factor binding protein 1 like 1	ENSG00000226742	18q23	No	Yes
HSD17B1	hydroxysteroid 17-beta dehydrogenase 1	ENSG00000108786	17q21.2	Yes	No
HSP90AA1	heat shock protein 90 alpha family class A member 1	ENSG00000080824	14q32.31	Yes	No
HSPA12B	heat shock protein family A (Hsp70) member 12B	ENSG00000132622	20p13	No	Yes
HSPA8	heat shock protein family A (Hsp70) member 8	ENSG00000109971	11q24.1	Yes	No
IBA57	iron-sulfur cluster assembly factor IBA57	ENSG00000181873	1q42.13	No	Yes
IDUA	alpha-L-iduronidase	ENSG00000127415	4p16.3	Yes	Yes
IFI16	interferon gamma inducible protein 16	ENSG00000163565	1q23.1	Yes	No
IFNA1	interferon alpha 1	ENSG00000197919	9p21.3	No	Yes
IFNA10	interferon alpha 10	ENSG00000186803	9p21.3	Yes	Yes
IFNA13	interferon alpha 13	ENSG00000233816	9p21.3	No	Yes
IFNA14	interferon alpha 14	ENSG00000228083	9p21.3	Yes	Yes
IFNA16	interferon alpha 16	ENSG00000147885	9p21.3	Yes	Yes
IFNA17	interferon alpha 17	ENSG00000234829	9p21.3	Yes	Yes
IFNA2	interferon alpha 2	ENSG00000188379	9p21.3	No	Yes
IFNA21	interferon alpha 21	ENSG00000137080	9p21.3	Yes	Yes
IFNA4	interferon alpha 4	ENSG00000236637	9p21.3	Yes	Yes
IFNA5	interferon alpha 5	ENSG00000147873	9p21.3	Yes	Yes
IFNA6	interferon alpha 6	ENSG00000120235	9p21.3	No	Yes
IFNA7	interferon alpha 7	ENSG00000214042	9p21.3	Yes	Yes
IFNA8	interferon alpha 8	ENSG00000120242	9p21.3	No	Yes
IFNB1	interferon beta 1	ENSG00000171855	9p21.3	Yes	Yes
IFNW1	interferon omega 1	ENSG00000177047	9p21.3	Yes	Yes
IFT122	intraflagellar transport 122	ENSG00000163913	3q21.3-q22.1	Yes	No
IFT74	intraflagellar transport 74	ENSG00000096872	9p21.2	Yes	No
IFT80	intraflagellar transport 80	ENSG00000068885	3q25.33	Yes	No
IGFALS	insulin like growth factor binding protein acid labile subunit	ENSG00000099769	16p13.3	No	Yes
IGLL5	immunoglobulin lambda like polypeptide 5	ENSG00000254709	22q11.22	Yes	No
IKBIP	IKBKB interacting protein	ENSG00000166130	12q23.1	Yes	No
IL18	interleukin 18	ENSG00000150782	11q23.1	Yes	No
IL1RAPL1	interleukin 1 receptor accessory protein like 1	ENSG00000169306	Xp21.3-p21.2	Yes	No
IMPG1	interphotoreceptor matrix proteoglycan 1	ENSG00000112706	6q14.1	Yes	No
ING1	inhibitor of growth family member 1	ENSG00000153487	13q34	No	Yes
INPPL1	inositol polyphosphate phosphatase like 1	ENSG00000165458	11q13.4	No	Yes
INTS1	integrator complex subunit 1	ENSG00000164880	7p22.3	No	Yes
INTS11	integrator complex subunit 11	ENSG00000127054	1p36.33	No	Yes
INTS2	integrator complex subunit 2	ENSG00000108506	17q23.2	Yes	No
IPO7	importin 7	ENSG00000205339	11p15.4	Yes	No
IQCB1	IQ motif containing B1	ENSG00000173226	3q13.33	Yes	No
IRAK4	interleukin 1 receptor associated kinase 4	ENSG00000198001	12q12	Yes	No
IRX1	iroquois homeobox 1	ENSG00000170549	5p15.33	No	Yes
IRX2	iroquois homeobox 2	ENSG00000170561	5p15.33	No	Yes
IRX4	iroquois homeobox 4	ENSG00000113430	5p15.33	No	Yes
ISL2	ISL LIM homeobox 2	ENSG00000159556	15q24.3	No	Yes
ITCH	itchy E3 ubiquitin protein ligase	ENSG00000078747	20q11.22	Yes	No
ITFG1	integrin alpha FG-GAP repeat containing 1	ENSG00000129636	16q12.1	Yes	No
ITGA2	integrin subunit alpha 2	ENSG00000164171	5q11.2	Yes	No
ITGA6	integrin subunit alpha 6	ENSG00000091409	2q31.1	Yes	No
ITGB3BP	integrin subunit beta 3 binding protein	ENSG00000142856	1p31.3	Yes	No
ITGB4	integrin subunit beta 4	ENSG00000132470	17q25.1	No	Yes
ITM2B	integral membrane protein 2B	ENSG00000136156	13q14.2	Yes	No
IVNS1ABP	influenza virus NS1A binding protein	ENSG00000116679	1q25.3	Yes	No
JAG2	jagged canonical Notch ligand 2	ENSG00000184916	14q32.33	No	Yes
JHY	junctional cadherin complex regulator	ENSG00000109944	11q24.1	Yes	No
JMJD6	jumonji domain containing 6, arginine demethylase and lysine hydroxylase	ENSG00000070495	17q25.1	Yes	No
JPH4	junctophilin 4	ENSG00000092051	14q11.2	No	Yes
KANSL1	KAT8 regulatory NSL complex subunit 1	ENSG00000120071, ENSG00000275867, ENSG00000278458	17q21.31	Yes	No
KAT6B	lysine acetyltransferase 6B	ENSG00000156650, ENSG00000281813	10q22.2	Yes	No
KAT7	lysine acetyltransferase 7	ENSG00000136504	17q21.33	Yes	No
KCNC1	potassium voltage-gated channel subfamily C member 1	ENSG00000129159	11p15.1	No	Yes
KCNG2	potassium voltage-gated channel modifier subfamily G member 2	ENSG00000178342	18q23	No	Yes
KCNJ8	potassium inwardly rectifying channel subfamily J member 8	ENSG00000121361	12p12.1	Yes	No
KCNQ2	potassium voltage-gated channel subfamily Q member 2	ENSG00000075043, ENSG00000281151	20q13.33	No	Yes
KCNT1	potassium sodium-activated channel subfamily T member 1	ENSG00000107147	9q34.3	No	Yes
KCNT2	potassium sodium-activated channel subfamily T member 2	ENSG00000162687	1q31.3	Yes	No
KDM5A	lysine demethylase 5A	ENSG00000073614	12p13.33	Yes	No
KDM5D	lysine demethylase 5D	ENSG00000012817	Yq11.223	Yes	Yes
KDM6A	lysine demethylase 6A	ENSG00000147050	Xp11.3	Yes	No
KIF1A	kinesin family member 1A	ENSG00000130294	2q37.3	Yes	No
KIF1B	kinesin family member 1B	ENSG00000054523	1p36.22	Yes	No
KIF21A	kinesin family member 21A	ENSG00000139116	12q12	Yes	No
KIF26A	kinesin family member 26A	ENSG00000066735	14q32.33	Yes	Yes
KIF7	kinesin family member 7	ENSG00000166813	15q26.1	No	Yes
KIFC2	kinesin family member C2	ENSG00000167702	8q24.3	No	Yes
KIR2DL1	killer cell immunoglobulin like receptor, two Ig domains and long cytoplasmic tail 1	ENSG00000125498, ENSG00000277833, ENSG00000276387, ENSG00000278821, ENSG00000275080, ENSG00000278207, ENSG00000276310, ENSG00000274692, ENSG00000278805, ENSG00000273794, ENSG00000278248, ENSG00000275522, ENSG00000274926, ENSG00000275276, ENSG00000277616, ENSG00000275750, ENSG00000278738, ENSG00000275196, ENSG00000276625, ENSG00000274782, ENSG00000278755, ENSG00000278495, ENSG00000276820, ENSG0000…	19q13.42	Yes	No
KIR2DL2	killer cell immunoglobulin like receptor, two Ig domains and long cytoplasmic tail 2	ENSG00000274412, ENSG00000275960, ENSG00000276011, ENSG00000277725, ENSG00000283716, ENSG00000284555	19q13.4	Yes	No
KIR2DL3	killer cell immunoglobulin like receptor, two Ig domains and long cytoplasmic tail 3	ENSG00000243772, ENSG00000274402, ENSG00000275658, ENSG00000275623, ENSG00000278369, ENSG00000276218, ENSG00000275008, ENSG00000274830, ENSG00000277924, ENSG00000276459, ENSG00000277554, ENSG00000276590, ENSG00000274952, ENSG00000278327, ENSG00000277484, ENSG00000277317, ENSG00000273887, ENSG00000274108, ENSG00000273947, ENSG00000274410, ENSG00000284504, ENSG00000284132, ENSG00000283996, ENSG0000…	19q13.42	Yes	No
KIR2DL4	killer cell immunoglobulin like receptor, two Ig domains and long cytoplasmic tail 4	ENSG00000189013, ENSG00000278606, ENSG00000277076, ENSG00000278430, ENSG00000276044, ENSG00000275848, ENSG00000277362, ENSG00000278201, ENSG00000274189, ENSG00000273575, ENSG00000278271, ENSG00000275456, ENSG00000277540, ENSG00000274609, ENSG00000273498, ENSG00000274193, ENSG00000278074, ENSG00000274945, ENSG00000277964, ENSG00000277355, ENSG00000276979, ENSG00000277850, ENSG00000274955, ENSG0000…	19q13.42	Yes	No
KIR2DS1	killer cell immunoglobulin like receptor, two Ig domains and short cytoplasmic tail 1	ENSG00000275921, ENSG00000278120, ENSG00000276327, ENSG00000283937, ENSG00000284120, ENSG00000284150	19q13.4	Yes	No
KIR2DS2	killer cell immunoglobulin like receptor, two Ig domains and short cytoplasmic tail 2	ENSG00000275583, ENSG00000278300, ENSG00000277885, ENSG00000275452	19q13.4	Yes	No
KIR2DS3	killer cell immunoglobulin like receptor, two Ig domains and short cytoplasmic tail 3	ENSG00000278306, ENSG00000284301, ENSG00000284039, ENSG00000288487	19q13.4	Yes	No
KIR2DS4	killer cell immunoglobulin like receptor, two Ig domains and short cytoplasmic tail 4	ENSG00000221957, ENSG00000275351, ENSG00000276209, ENSG00000274533, ENSG00000274921, ENSG00000274957, ENSG00000277078, ENSG00000276395, ENSG00000277345, ENSG00000274807, ENSG00000275731, ENSG00000276154, ENSG00000276634, ENSG00000274406, ENSG00000274324, ENSG00000274947, ENSG00000275353, ENSG00000275938, ENSG00000276885, ENSG00000276465, ENSG00000274714, ENSG00000273526, ENSG00000273931, ENSG0000…	19q13.42	Yes	No
KIR2DS5	killer cell immunoglobulin like receptor, two Ig domains and short cytoplasmic tail 5	ENSG00000274739, ENSG00000284111, ENSG00000283889, ENSG00000288357, ENSG00000288206	19q13.4	Yes	No
KIR3DL1	killer cell immunoglobulin like receptor, three Ig domains and long cytoplasmic tail 1	ENSG00000167633, ENSG00000275486, ENSG00000274146, ENSG00000277175, ENSG00000275659, ENSG00000274920, ENSG00000273775, ENSG00000276329, ENSG00000274948, ENSG00000278427, ENSG00000278856, ENSG00000275545, ENSG00000273518, ENSG00000276501, ENSG00000277272, ENSG00000275717, ENSG00000276379, ENSG00000275288, ENSG00000275786, ENSG00000278368, ENSG00000276423, ENSG00000278079, ENSG00000274036, ENSG0000…	19q13.42	Yes	No
KIR3DL2	killer cell immunoglobulin like receptor, three Ig domains and long cytoplasmic tail 2	ENSG00000240403, ENSG00000275083, ENSG00000275416, ENSG00000278656, ENSG00000275838, ENSG00000276739, ENSG00000277709, ENSG00000273911, ENSG00000278361, ENSG00000278474, ENSG00000278850, ENSG00000277982, ENSG00000276424, ENSG00000276004, ENSG00000275626, ENSG00000276357, ENSG00000278403, ENSG00000275511, ENSG00000275566, ENSG00000273735, ENSG00000275262, ENSG00000278442, ENSG00000278758, ENSG0000…	19q13.42	Yes	No
KIR3DS1	killer cell immunoglobulin like receptor, three Ig domains and short cytoplasmic tail 1	ENSG00000275434, ENSG00000274465, ENSG00000284111, ENSG00000283889, ENSG00000283719	19q13.4	Yes	No
KITLG	KIT ligand	ENSG00000049130	12q21.32	Yes	No
KLHDC7B	kelch domain containing 7B	ENSG00000130487	22q13.33	No	Yes
KLHL17	kelch like family member 17	ENSG00000187961	1p36.33	No	Yes
KLHL30	kelch like family member 30	ENSG00000168427	2q37.3	Yes	Yes
KLHL7	kelch like family member 7	ENSG00000122550	7p15.3	Yes	No
KLHL9	kelch like family member 9	ENSG00000198642	9p21.3	Yes	Yes
KLRC1	killer cell lectin like receptor C1	ENSG00000134545	12p13.2	Yes	No
KLRC2	killer cell lectin like receptor C2	ENSG00000205809	12p13.2	Yes	No
KLRC3	killer cell lectin like receptor C3	ENSG00000205810	12p13.2	Yes	No
KNDC1	kinase non-catalytic C-lobe domain containing 1	ENSG00000171798	10q26.3	No	Yes
KNTC1	kinetochore associated 1	ENSG00000184445	12q24.31	Yes	No
KPNA5	karyopherin subunit alpha 5	ENSG00000196911	6q22.1	Yes	No
KRIT1	KRIT1 ankyrin repeat containing	ENSG00000001631, ENSG00000285953	7q21.2	Yes	No
KRT10	keratin 10	ENSG00000186395	17q21.2	Yes	No
KRT16P2	keratin 16 pseudogene 2	NA	17p11.2	Yes	No
KRT17P1	keratin 17 pseudogene 1	NA	17p11.2	Yes	No
KRT17P2	keratin 17 pseudogene 2	NA	17p11.2	Yes	No
KRT28	keratin 28	ENSG00000173908	17q21.2	Yes	No
KRT6C	keratin 6C	ENSG00000170465	12q13.13	Yes	No
KRT9	keratin 9	ENSG00000171403	17q21.2	Yes	No
KRTAP13-1	keratin associated protein 13-1	ENSG00000198390	21q22.11	No	Yes
KRTAP13-2	keratin associated protein 13-2	ENSG00000182816	21q22.11	No	Yes
KRTAP13-3	keratin associated protein 13-3	ENSG00000240432	21q22.11	No	Yes
KRTAP13-4	keratin associated protein 13-4	ENSG00000186971	21q22.11	No	Yes
KRTAP15-1	keratin associated protein 15-1	ENSG00000186970	21q22.11	No	Yes
KRTAP19-1	keratin associated protein 19-1	ENSG00000184351	21q22.11	No	Yes
KRTAP19-2	keratin associated protein 19-2	ENSG00000186965	21q22.11	No	Yes
KRTAP19-3	keratin associated protein 19-3	ENSG00000244025	21q22.11	No	Yes
KRTAP19-4	keratin associated protein 19-4	ENSG00000186967	21q22.11	No	Yes
KRTAP19-5	keratin associated protein 19-5	ENSG00000186977	21q22.11	No	Yes
KRTAP19-6	keratin associated protein 19-6	ENSG00000186925	21q22.11	No	Yes
KRTAP19-7	keratin associated protein 19-7	ENSG00000244362	21q22.11	No	Yes
KRTAP2-4	keratin associated protein 2-4	ENSG00000213417, ENSG00000263091	17q21.2	Yes	No
KRTAP23-1	keratin associated protein 23-1	ENSG00000186980	21q22.11	No	Yes
KRTAP24-1	keratin associated protein 24-1	ENSG00000188694	21q22.11	No	Yes
KRTAP25-1	keratin associated protein 25-1	ENSG00000232263	21q22.11	No	Yes
KRTAP26-1	keratin associated protein 26-1	ENSG00000197683	21q22.11	No	Yes
KRTAP27-1	keratin associated protein 27-1	ENSG00000206107	21q22.11	No	Yes
KRTAP4-11	keratin associated protein 4-11	ENSG00000212721, ENSG00000263229	17q21.2	Yes	Yes
KRTAP4-12	keratin associated protein 4-12	ENSG00000213416, ENSG00000263236	17q21.2	Yes	Yes
KRTAP4-7	keratin associated protein 4-7	ENSG00000240871	17q21.2	Yes	Yes
KRTAP4-8	keratin associated protein 4-8	ENSG00000204880, ENSG00000261968	17q21.2	Yes	Yes
KRTAP4-9	keratin associated protein 4-9	ENSG00000212722, ENSG00000262121	17q21.2	Yes	Yes
KRTAP9-7	keratin associated protein 9-7	ENSG00000180386, ENSG00000262221	17q21.2	Yes	Yes
KYNU	kynureninase	ENSG00000115919	2q22.2	Yes	No
LAMA2	laminin subunit alpha 2	ENSG00000196569	6q22.33	Yes	No
LAMA5	laminin subunit alpha 5	ENSG00000130702	20q13.33	No	Yes
LAMC3	laminin subunit gamma 3	ENSG00000050555	9q34.12	No	Yes
LAMP2	lysosomal associated membrane protein 2	ENSG00000005893	Xq24	Yes	No
LAT	linker for activation of T cells	ENSG00000213658	16p11.2	Yes	No
LBHD2	LBH domain containing 2	ENSG00000283071	14q32.32	No	Yes
LCE3B	late cornified envelope 3B	ENSG00000187238	1q21.3	Yes	No
LCE3C	late cornified envelope 3C	ENSG00000244057	1q21.3	Yes	No
LCE3D	late cornified envelope 3D	ENSG00000163202	1q21.3	Yes	No
LCE3E	late cornified envelope 3E	ENSG00000185966	1q21.3	Yes	No
LCN12	lipocalin 12	ENSG00000184925	9q34.3	No	Yes
LCNL1	lipocalin like 1	ENSG00000214402	9q34.3	No	Yes
LDHB	lactate dehydrogenase B	ENSG00000111716	12p12.1	Yes	No
LDOC1	LDOC1 regulator of NFKB signaling	ENSG00000182195	Xq27.1	No	Yes
LEFTY2	left-right determination factor 2	ENSG00000143768	1q42.12	No	Yes
LEKR1	leucine, glutamate and lysine rich 1	ENSG00000197980	3q25.31	Yes	No
LEMD3	LEM domain containing 3	ENSG00000174106	12q14.3	Yes	No
LEPR	leptin receptor	ENSG00000116678	1p31.3	Yes	No
LFNG	LFNG O-fucosylpeptide 3-beta-N-acetylglucosaminyltransferase	ENSG00000106003	7p22.3	No	Yes
LGALS13	galectin 13	ENSG00000105198	19q13.2	Yes	No
LGALS14	galectin 14	ENSG00000006659	19q13.2	Yes	No
LGALS16	galectin 16	ENSG00000249861	19q13.2	Yes	No
LGALS9B	galectin 9B	ENSG00000170298	17p11.2	Yes	Yes
LGALS9C	galectin 9C	ENSG00000171916, ENSG00000284021	17p11.2	Yes	Yes
LHX3	LIM homeobox 3	ENSG00000107187	9q34.3	No	Yes
LIFR	LIF receptor subunit alpha	ENSG00000113594	5p13.1	Yes	No
LILRA6	leukocyte immunoglobulin like receptor A6	ENSG00000244482, ENSG00000275584, ENSG00000275539, ENSG00000277177, ENSG00000274148	19q13.42	Yes	Yes
LILRB2	leukocyte immunoglobulin like receptor B2	ENSG00000131042, ENSG00000277751, ENSG00000276146, ENSG00000274513, ENSG00000275463	19q13.42	No	Yes
LILRB3	leukocyte immunoglobulin like receptor B3	ENSG00000204577, ENSG00000277816, ENSG00000275019, ENSG00000274587	19q13.42	Yes	Yes
LILRB5	leukocyte immunoglobulin like receptor B5	ENSG00000105609, ENSG00000273991, ENSG00000277414, ENSG00000274311, ENSG00000278437	19q13.42	Yes	No
LIMS1	LIM zinc finger domain containing 1	ENSG00000169756	2q12.3	Yes	No
LIN9	lin-9 DREAM MuvB core complex component	ENSG00000183814	1q42.12	Yes	No
LINC00221	long intergenic non-protein coding RNA 221	ENSG00000270816	14q32.33	Yes	No
LINC00226	long intergenic non-protein coding RNA 226	NA	14q32.33	Yes	Yes
LINC02210-CRHR1	LINC02210-CRHR1 readthrough	ENSG00000263715, ENSG00000120088, ENSG00000282456, ENSG00000276191, ENSG00000278232	17q21.31	Yes	Yes
LIPI	lipase I	ENSG00000188992	21q11.2	Yes	No
LIPN	lipase family member N	ENSG00000204020	10q23.31	No	Yes
LMBRD1	LMBR1 domain containing 1	ENSG00000168216	6q13	Yes	No
LMF1	lipase maturation factor 1	ENSG00000103227, ENSG00000260807	16p13.3	No	Yes
LMF2	lipase maturation factor 2	ENSG00000100258	22q13.33	No	Yes
LMNTD2	lamin tail domain containing 2	ENSG00000185522, ENSG00000275873	11p15.5	Yes	Yes
LOC100128108	putative ubiquitin-conjugating enzyme E2Q2-like protein	ENSG00000259658	15q26.3	No	Yes
LOC100129484	uncharacterized LOC100129484	ENSG00000234432	7p22.1	No	Yes
LOC100996750	keratin-associated protein 4-7	ENSG00000266286	NA	Yes	Yes
LOC101927050	lysine methyltransferase 2C pseudogene	NA	2p11.2	Yes	Yes
LOC102724159	periodic tryptophan protein 2 homolog	ENSG00000275464	21p12	Yes	No
LOC102724488	synaptotagmin-15	ENSG00000277758, ENSG00000288175	10q11.22	Yes	No
LOC102725023	killer cell immunoglobulin-like receptor 2DS3-like	ENSG00000275500	NA	Yes	No
LOC102725072	Putative uncharacterized protein DKFZp434K191	ENSG00000161103	22q11.21	Yes	Yes
LOC105370401	uncharacterized LOC105370401	ENSG00000251002	14q11.2	Yes	No
LOC105374297	uncharacterized LOC105374297	NA	3q29	No	Yes
LOC110117498-PIK3R3	LOC110117498-PIK3R3 readthrough	ENSG00000278139	NA	Yes	No
LOC110384692	complement C4A (Rodgers blood group)-like	ENSG00000206340, ENSG00000244207, ENSG00000244731, ENSG00000227746	6p21.33	Yes	No
LOC112267881	killer cell immunoglobulin-like receptor 2DL1-like	ENSG00000277833, ENSG00000278821, ENSG00000275080, ENSG00000278207, ENSG00000276310, ENSG00000274692, ENSG00000278805, ENSG00000273794, ENSG00000278248, ENSG00000275522, ENSG00000274926, ENSG00000275276, ENSG00000277616, ENSG00000275750, ENSG00000125498, ENSG00000278738, ENSG00000275196, ENSG00000276625, ENSG00000274782, ENSG00000278755, ENSG00000278495, ENSG00000276820, ENSG00000277356, ENSG0000…	NA	Yes	No
LOC112268354	killer cell immunoglobulin-like receptor 2DL4-like	ENSG00000278606, ENSG00000277076, ENSG00000278430, ENSG00000276044, ENSG00000275848, ENSG00000277362, ENSG00000278201, ENSG00000274189, ENSG00000273575, ENSG00000278271, ENSG00000275456, ENSG00000277540, ENSG00000274609, ENSG00000273498, ENSG00000274193, ENSG00000278074, ENSG00000274945, ENSG00000277964, ENSG00000189013, ENSG00000277355, ENSG00000276979, ENSG00000277850, ENSG00000274955, ENSG0000…	NA	Yes	No
LOC112268355	killer cell immunoglobulin-like receptor 3DS1-like	ENSG00000274283, ENSG00000275037, ENSG00000275608, ENSG00000276498, ENSG00000274465, ENSG00000284301	NA	Yes	No
LOC388436	uncharacterized protein ENSP00000382042	NA	17p11.2	Yes	No
LOC391322	D-dopachrome tautomerase-like	NA	22q11.23	No	Yes
LOC400464	ubiquitin conjugating enzyme E2 Q2 pseudogene	NA	15q26.3	No	Yes
LOC649352	ubiquitin carboxyl-terminal hydrolase 17-like protein 2-like	NA	8p23.1	Yes	No
LOC728989	phosphodiesterase 4D interacting protein pseudogene	NA	1q21.1	Yes	No
LOC79999	uncharacterized protein ENSP00000382033	NA	17p11.2	Yes	No
LPCAT2	lysophosphatidylcholine acyltransferase 2	ENSG00000087253	16q12.2	Yes	No
LPXN	leupaxin	ENSG00000110031	11q12.1	No	Yes
LRCOL1	leucine rich colipase like 1	ENSG00000204583	12q24.33	No	Yes
LRFN4	leucine rich repeat and fibronectin type III domain containing 4	ENSG00000173621	11q13.2	No	Yes
LRP1B	LDL receptor related protein 1B	ENSG00000168702	2q22.1-q22.2	No	Yes
LRPAP1	LDL receptor related protein associated protein 1	ENSG00000163956	4p16.3	Yes	Yes
LRRC14	leucine rich repeat containing 14	ENSG00000160959	8q24.3	No	Yes
LRRC19	leucine rich repeat containing 19	ENSG00000184434	9p21.2	Yes	No
LRRC24	leucine rich repeat containing 24	ENSG00000254402	8q24.3	No	Yes
LRRC26	leucine rich repeat containing 26	ENSG00000184709	9q34.3	No	Yes
LRRC37A	leucine rich repeat containing 37A	ENSG00000176681, ENSG00000278742	17q21.31	Yes	No
LRRC37A2	leucine rich repeat containing 37 member A2	ENSG00000238083, ENSG00000274332, ENSG00000277221	17q21.31	Yes	No
LRRC37B	leucine rich repeat containing 37B	ENSG00000185158	17q11.2	Yes	No
LRRC56	leucine rich repeat containing 56	ENSG00000161328, ENSG00000273831	11p15.5	Yes	Yes
LRRD1	leucine rich repeats and death domain containing 1	ENSG00000240720	7q21.2	Yes	No
LRRIQ1	leucine rich repeats and IQ motif containing 1	ENSG00000133640	12q21.31	Yes	No
LRRK2	leucine rich repeat kinase 2	ENSG00000188906	12q12	Yes	No
LRWD1	leucine rich repeats and WD repeat domain containing 1	ENSG00000161036	7q22.1	No	Yes
LSM14B	LSM family member 14B	ENSG00000149657	20q13.33	No	Yes
LSP1P4	LSP1 pseudogene 4	NA	2p11.2	Yes	Yes
LTBP3	latent transforming growth factor beta binding protein 3	ENSG00000168056	11q13.1	No	Yes
LTK	leukocyte receptor tyrosine kinase	ENSG00000062524	15q15.1	No	Yes
LTN1	listerin E3 ubiquitin protein ligase 1	ENSG00000198862	21q21.3	Yes	No
LYST	lysosomal trafficking regulator	ENSG00000143669	1q42.3	Yes	No
MAB21L4	mab-21 like 4	ENSG00000172478	2q37.3	No	Yes
MAF1	MAF1 homolog, negative regulator of RNA polymerase III	ENSG00000179632	8q24.3	No	Yes
MAFA	MAF bZIP transcription factor A	ENSG00000182759	8q24.3	No	Yes
MAFK	MAF bZIP transcription factor K	ENSG00000198517	7p22.3	No	Yes
MAGEA2	MAGE family member A2	ENSG00000268606	Xq28	Yes	No
MAGEA2B	MAGE family member A2B	ENSG00000183305	Xq28	Yes	No
MAGEA3	MAGE family member A3	ENSG00000221867	Xq28	Yes	No
MAGOHB	mago homolog B, exon junction complex subunit	ENSG00000111196	12p13.2	Yes	No
MAMDC4	MAM domain containing 4	ENSG00000177943	9q34.3	No	Yes
MAN1B1	mannosidase alpha class 1B member 1	ENSG00000177239	9q34.3	Yes	Yes
MAP11	microtubule associated protein 11	ENSG00000146826	7q22.1	Yes	No
MAP3K1	mitogen-activated protein kinase kinase kinase 1	ENSG00000095015	5q11.2	Yes	No
MAP7D1	MAP7 domain containing 1	ENSG00000116871	1p34.3	No	Yes
MAPK8IP3	mitogen-activated protein kinase 8 interacting protein 3	ENSG00000138834	16p13.3	No	Yes
MAPT	microtubule associated protein tau	ENSG00000186868, ENSG00000276155, ENSG00000277956	17q21.31	Yes	No
MARCHF11	membrane associated ring-CH-type finger 11	ENSG00000183654	5p15.1	Yes	No
MATR3	matrin 3	ENSG00000015479, ENSG00000280987	5q31.2	Yes	No
MBD3L2	methyl-CpG binding domain protein 3 like 2	ENSG00000230522	19p13.2	Yes	No
MBD3L2B	methyl-CpG binding domain protein 3 like 2B	ENSG00000196589	19p13.2	Yes	No
MBD3L4	methyl-CpG binding domain protein 3 like 4	ENSG00000205718	19p13.2	Yes	No
MBD3L5	methyl-CpG binding domain protein 3 like 5	ENSG00000237247	19p13.2	Yes	No
MBD4	methyl-CpG binding domain 4, DNA glycosylase	ENSG00000129071	3q21.3	Yes	No
MBTD1	mbt domain containing 1	ENSG00000011258	17q21.33	Yes	No
MBTPS2	membrane bound transcription factor peptidase, site 2	ENSG00000012174	Xp22.12	Yes	No
MCCC2	methylcrotonoyl-CoA carboxylase 2	ENSG00000131844, ENSG00000275300, ENSG00000281742	5q13.2	Yes	No
MCF2L	MCF.2 cell line derived transforming sequence like	ENSG00000126217	13q34	No	Yes
MDGA2	MAM domain containing glycosylphosphatidylinositol anchor 2	ENSG00000139915	14q21.3	Yes	No
MED1	mediator complex subunit 1	ENSG00000125686	17q12	Yes	No
MED13	mediator complex subunit 13	ENSG00000108510	17q23.2	Yes	No
MED13L	mediator complex subunit 13L	ENSG00000123066	12q24.21	Yes	No
MED23	mediator complex subunit 23	ENSG00000112282	6q23.2	Yes	No
MED31	mediator complex subunit 31	ENSG00000108590	17p13.1	Yes	No
MEF2C	myocyte enhancer factor 2C	ENSG00000081189	5q14.3	Yes	No
MEGF6	multiple EGF like domains 6	ENSG00000162591	1p36.32	No	Yes
MEIOB	meiosis specific with OB-fold	ENSG00000162039, ENSG00000282650	16p13.3	Yes	No
MEIOC	meiosis specific with coiled-coil domain	ENSG00000180336	17q21.31	Yes	No
MELTF	melanotransferrin	ENSG00000163975	3q29	No	Yes
MET	MET proto-oncogene, receptor tyrosine kinase	ENSG00000105976	7q31.2	Yes	No
METTL16	methyltransferase like 16	ENSG00000127804	17p13.3	Yes	No
METTL23	methyltransferase like 23	ENSG00000181038	17q25.1	Yes	No
METTL6	methyltransferase like 6	ENSG00000206562	3p25.1	Yes	No
MEX3C	mex-3 RNA binding family member C	ENSG00000176624	18q21.2	No	Yes
MFSD10	major facilitator superfamily domain containing 10	ENSG00000109736	4p16.3	No	Yes
MFSD11	major facilitator superfamily domain containing 11	ENSG00000092931	17q25.1-q25.2	Yes	No
MFSD3	major facilitator superfamily domain containing 3	ENSG00000167700	8q24.3	No	Yes
MGAM	maltase-glucoamylase	ENSG00000257335, ENSG00000282607	7q34	Yes	No
MGAT4C	MGAT4 family member C	ENSG00000182050, ENSG00000283530, ENSG00000285137	12q21.31-q21.32	Yes	No
MIA2	MIA SH3 domain ER export factor 2	ENSG00000150527	14q21.1	Yes	No
MIB2	mindbomb E3 ubiquitin protein ligase 2	ENSG00000197530	1p36.33	No	Yes
MICA	MHC class I polypeptide-related sequence A	ENSG00000204520, ENSG00000231225, ENSG00000233051, ENSG00000183214, ENSG00000235233	6p21.33	Yes	No
MICALL2	MICAL like 2	ENSG00000164877	7p22.3	No	Yes
MIR1283-1	microRNA 1283-1	ENSG00000221421	19q13.42	Yes	No
MIR1283-2	microRNA 1283-2	ENSG00000221548	19q13.42	Yes	No
MIR3675	microRNA 3675	ENSG00000263811	1p36.13	Yes	No
MIR3689A	microRNA 3689a	ENSG00000265872	9q34.3	No	Yes
MIR3689B	microRNA 3689b	ENSG00000264163	9q34.3	No	Yes
MIR3689D1	microRNA 3689d-1	ENSG00000265848	9q34.3	No	Yes
MIR3689D2	microRNA 3689d-2	ENSG00000264136	9q34.3	No	Yes
MIR3689E	microRNA 3689e	ENSG00000266827	9q34.3	No	Yes
MIR4537	microRNA 4537	ENSG00000264781	14q32.33	Yes	No
MIR4539	microRNA 4539	ENSG00000265612	14q32.33	Yes	No
MIR498	microRNA 498	ENSG00000207869	19q13.42	Yes	No
MIR515-1	microRNA 515-1	ENSG00000207616	19q13.42	Yes	No
MIR515-2	microRNA 515-2	ENSG00000207615	19q13.42	Yes	No
MIR516A1	microRNA 516a-1	ENSG00000207767	19q13.42	Yes	No
MIR516B1	microRNA 516b-1	ENSG00000207946	19q13.42	Yes	No
MIR516B2	microRNA 516b-2	ENSG00000207925	19q13.42	Yes	No
MIR517A	microRNA 517a	ENSG00000207734	19q13.42	Yes	No
MIR517B	microRNA 517b	ENSG00000207837	19q13.42	Yes	No
MIR517C	microRNA 517c	ENSG00000207838	19q13.42	Yes	No
MIR518A1	microRNA 518a-1	ENSG00000207803	19q13.42	Yes	No
MIR518A2	microRNA 518a-2	ENSG00000207699	19q13.42	Yes	No
MIR518B	microRNA 518b	ENSG00000207862	19q13.42	Yes	No
MIR518C	microRNA 518c	ENSG00000283490	19q13.42	Yes	No
MIR518D	microRNA 518d	ENSG00000283330	19q13.42	Yes	No
MIR518E	microRNA 518e	ENSG00000207987	19q13.42	Yes	No
MIR518F	microRNA 518f	ENSG00000207706	19q13.42	Yes	No
MIR5195	microRNA 5195	ENSG00000265929	14q32.33	Yes	No
MIR519A1	microRNA 519a-1	ENSG00000207992	19q13.42	Yes	No
MIR519B	microRNA 519b	ENSG00000207825	19q13.42	Yes	No
MIR519C	microRNA 519c	ENSG00000207788	19q13.42	Yes	No
MIR519D	microRNA 519d	ENSG00000207981	19q13.42	Yes	No
MIR519E	microRNA 519e	ENSG00000207810	19q13.42	Yes	No
MIR520A	microRNA 520a	ENSG00000207594	19q13.42	Yes	No
MIR520B	microRNA 520b	ENSG00000207722	19q13.42	Yes	No
MIR520C	microRNA 520c	ENSG00000207738	19q13.42	Yes	No
MIR520D	microRNA 520d	ENSG00000207735	19q13.42	Yes	No
MIR520E	microRNA 520e	ENSG00000207599	19q13.42	Yes	No
MIR520F	microRNA 520f	ENSG00000283540	19q13.42	Yes	No
MIR520G	microRNA 520g	ENSG00000207799	19q13.42	Yes	No
MIR520H	microRNA 520h	ENSG00000207861	19q13.42	Yes	No
MIR521-1	microRNA 521-1	ENSG00000207634	19q13.42	Yes	No
MIR521-2	microRNA 521-2	ENSG00000207549	19q13.42	Yes	No
MIR522	microRNA 522	ENSG00000283685	19q13.42	Yes	No
MIR523	microRNA 523	ENSG00000283455	19q13.42	Yes	No
MIR524	microRNA 524	ENSG00000283289	19q13.42	Yes	No
MIR525	microRNA 525	ENSG00000207711	19q13.42	Yes	No
MIR526A1	microRNA 526a-1	ENSG00000207629	19q13.42	Yes	No
MIR526A2	microRNA 526a-2	ENSG00000211532	19q13.42	Yes	No
MIR526B	microRNA 526b	ENSG00000207580	19q13.42	Yes	No
MIR527	microRNA 527	ENSG00000207979	19q13.42	Yes	No
MIR570HG	MIR570 host gene	NA	3q29	Yes	No
MIR6859-1	microRNA 6859-1	ENSG00000278267	1p36.33	Yes	No
MIR6859-2	microRNA 6859-2	ENSG00000273874	1p36.33	Yes	No
MIR6859-3	microRNA 6859-3	ENSG00000275449	15q26.3	Yes	No
MIR6859-4	microRNA 6859-4	ENSG00000278739	16p13.3	Yes	No
MIR8071-1	microRNA 8071-1	ENSG00000274172	14q32.33	Yes	No
MIR8071-2	microRNA 8071-2	ENSG00000277030	14q32.33	Yes	No
MIS18BP1	MIS18 binding protein 1	ENSG00000129534	14q21.2	Yes	No
MLH1	mutL homolog 1	ENSG00000076242	3p22.2	Yes	No
MLH3	mutL homolog 3	ENSG00000119684	14q24.3	Yes	No
MME	membrane metalloendopeptidase	ENSG00000196549	3q25.2	Yes	No
MMP17	matrix metallopeptidase 17	ENSG00000198598	12q24.33	No	Yes
MMRN1	multimerin 1	ENSG00000138722	4q22.1	No	Yes
MNDA	myeloid cell nuclear differentiation antigen	ENSG00000163563	1q23.1	Yes	No
MNS1	meiosis specific nuclear structural 1	ENSG00000138587	15q21.3	Yes	No
MNX1	motor neuron and pancreas homeobox 1	ENSG00000130675	7q36.3	No	Yes
MOCS2	molybdenum cofactor synthesis 2	ENSG00000164172	5q11.2	Yes	No
MPEG1	macrophage expressed 1	ENSG00000197629	11q12.1	No	Yes
MPHOSPH6	M-phase phosphoprotein 6	ENSG00000135698	16q23.3	Yes	No
MRE11	MRE11 homolog, double strand break repair nuclease	ENSG00000020922	11q21	Yes	No
MRGPRE	MAS related GPR family member E	ENSG00000184350	11p15.4	Yes	No
MRGPRG	MAS related GPR family member G	ENSG00000182170	11p15.4	Yes	No
MROH6	maestro heat like repeat family member 6	ENSG00000204839, ENSG00000277781	8q24.3	No	Yes
MRPL20	mitochondrial ribosomal protein L20	ENSG00000242485	1p36.33	No	Yes
MRPL55	mitochondrial ribosomal protein L55	ENSG00000162910	1q42.13	No	Yes
MRPS26	mitochondrial ribosomal protein S26	ENSG00000125901	20p13	No	Yes
MRPS34	mitochondrial ribosomal protein S34	ENSG00000074071	16p13.3	No	Yes
MS4A2	membrane spanning 4-domains A2	ENSG00000149534	11q12.1	Yes	No
MSH2	mutS homolog 2	ENSG00000095002	2p21-p16.3	Yes	No
MSH3	mutS homolog 3	ENSG00000113318	5q14.1	Yes	No
MSH4	mutS homolog 4	ENSG00000057468	1p31.1	Yes	No
MST1	macrophage stimulating 1	ENSG00000173531	3p21.31	No	Yes
MST1L	macrophage stimulating 1 like	ENSG00000186715	1p36.13	No	Yes
MTBP	MDM2 binding protein	ENSG00000172167	8q24.12	Yes	No
MTMR2	myotubularin related protein 2	ENSG00000087053	11q21	Yes	No
MTRNR2L4	MT-RNR2 like 4	ENSG00000232196	16p13.3	Yes	No
MUC5AC	mucin 5AC, oligomeric mucus/gel-forming	ENSG00000215182, ENSG00000283158	11p15.5	No	Yes
MUC5B	mucin 5B, oligomeric mucus/gel-forming	ENSG00000117983	11p15.5	No	Yes
MXRA8	matrix remodeling associated 8	ENSG00000162576	1p36.33	No	Yes
MYBBP1A	MYB binding protein 1a	ENSG00000132382	17p13.2	No	Yes
MYCBP	MYC binding protein	ENSG00000214114	1p34.3	Yes	No
MYH13	myosin heavy chain 13	ENSG00000006788	17p13.1	Yes	No
MYH4	myosin heavy chain 4	ENSG00000264424	17p13.1	Yes	No
MYH8	myosin heavy chain 8	ENSG00000133020	17p13.1	Yes	No
MYO10	myosin X	ENSG00000145555	5p15.1	Yes	No
MYO3A	myosin IIIA	ENSG00000095777	10p12.1	Yes	No
MYO5A	myosin VA	ENSG00000197535	15q21.2	Yes	No
MYO6	myosin VI	ENSG00000196586	6q14.1	Yes	No
MYOD1	myogenic differentiation 1	ENSG00000129152	11p15.1	No	Yes
MYOT	myotilin	ENSG00000120729	5q31.2	Yes	No
NAALAD2	N-acetylated alpha-linked acidic dipeptidase 2	ENSG00000077616, ENSG00000285516	11q14.3	Yes	No
NAALADL2	N-acetylated alpha-linked acidic dipeptidase like 2	ENSG00000177694, ENSG00000284908	3q26.31	No	Yes
NACA2	nascent polypeptide associated complex subunit alpha 2	ENSG00000253506	17q23.2	Yes	No
NAE1	NEDD8 activating enzyme E1 subunit 1	ENSG00000159593	16q22.1	Yes	No
NAPRT	nicotinate phosphoribosyltransferase	ENSG00000147813, ENSG00000278488	8q24.3	No	Yes
NAT8L	N-acetyltransferase 8 like	ENSG00000185818	4p16.3	No	Yes
NBAS	NBAS subunit of NRZ tethering complex	ENSG00000151779	2p24.3	Yes	No
NBN	nibrin	ENSG00000104320	8q21.3	Yes	No
NBPF1	NBPF member 1	ENSG00000219481	1p36.13	Yes	Yes
NBPF10	NBPF member 10	ENSG00000271425	1q21.1	Yes	No
NBPF11	NBPF member 11	ENSG00000263956	1q21.2	Yes	No
NBPF12	NBPF member 12	ENSG00000268043	1q21.1	Yes	No
NBPF14	NBPF member 14	ENSG00000270629	1q21.2	Yes	No
NBPF26	NBPF member 26	ENSG00000273136	1p11.2	Yes	Yes
NBPF3	NBPF member 3	ENSG00000142794	1p36.12	Yes	No
NBPF4	NBPF member 4	ENSG00000196427	1p13.3	Yes	No
NBPF9	NBPF member 9	ENSG00000269713	1q21.2	Yes	Yes
NBR1	NBR1 autophagy cargo receptor	ENSG00000188554	17q21.31	Yes	No
NCAPH2	non-SMC condensin II complex subunit H2	ENSG00000025770	22q13.33	No	Yes
NCBP2	nuclear cap binding protein subunit 2	ENSG00000114503	3q29	No	Yes
NCBP2AS2	NCBP2 antisense 2 (head to head)	ENSG00000270170	3q29	No	Yes
NCF1	neutrophil cytosolic factor 1	ENSG00000158517	7q11.23	Yes	No
NCOR2	nuclear receptor corepressor 2	ENSG00000196498	12q24.31	No	Yes
NDOR1	NADPH dependent diflavin oxidoreductase 1	ENSG00000188566	9q34.3	No	Yes
NDUFAF2	NADH:ubiquinone oxidoreductase complex assembly factor 2	ENSG00000164182	5q12.1	Yes	No
NDUFAF5	NADH:ubiquinone oxidoreductase complex assembly factor 5	ENSG00000101247	20p12.1	Yes	No
NDUFAF6	NADH:ubiquinone oxidoreductase complex assembly factor 6	ENSG00000156170	8q22.1	Yes	No
NDUFAF8	NADH:ubiquinone oxidoreductase complex assembly factor 8	ENSG00000224877	17q25.3	No	Yes
NEBL	nebulette	ENSG00000078114	10p12.31	Yes	No
NEIL3	nei like DNA glycosylase 3	ENSG00000109674	4q34.3	Yes	No
NELFA	negative elongation factor complex member A	ENSG00000185049	4p16.3	No	Yes
NELFB	negative elongation factor complex member B	ENSG00000188986	9q34.3	No	Yes
NEURL1	neuralized E3 ubiquitin protein ligase 1	ENSG00000107954	10q24.33	No	Yes
NEUROD4	neuronal differentiation 4	ENSG00000123307	12q13.2	Yes	Yes
NEXMIF	neurite extension and migration factor	ENSG00000050030	Xq13.3	Yes	No
NEXN	nexilin F-actin binding protein	ENSG00000162614	1p31.1	Yes	No
NF1	neurofibromin 1	ENSG00000196712	17q11.2	Yes	No
NFATC1	nuclear factor of activated T cells 1	ENSG00000131196	18q23	No	Yes
NFKBIE	NFKB inhibitor epsilon	ENSG00000146232	6p21.1	Yes	No
NHLRC4	NHL repeat containing 4	ENSG00000257108	16p13.3	No	Yes
NIPBL	NIPBL cohesin loading factor	ENSG00000164190	5p13.2	Yes	No
NIPSNAP2	nipsnap homolog 2	ENSG00000146729	7p11.2	Yes	No
NKAPD1	NKAP domain containing 1	ENSG00000150776	11q23.1	Yes	No
NKX2-1	NK2 homeobox 1	ENSG00000136352	14q13.3	No	Yes
NKX2-8	NK2 homeobox 8	ENSG00000136327	14q13.3	No	Yes
NLGN1	neuroligin 1	ENSG00000169760	3q26.31	No	Yes
NLRP11	NLR family pyrin domain containing 11	ENSG00000179873	19q13.42-q13.43	Yes	Yes
NLRP14	NLR family pyrin domain containing 14	ENSG00000158077	11p15.4	Yes	No
NLRP4	NLR family pyrin domain containing 4	ENSG00000160505	19q13.43	Yes	Yes
NLRP6	NLR family pyrin domain containing 6	ENSG00000174885	11p15.5	No	Yes
NME3	NME/NM23 nucleoside diphosphate kinase 3	ENSG00000103024	16p13.3	No	Yes
NME8	NME/NM23 family member 8	ENSG00000086288	7p14.1	Yes	No
NOC4L	nucleolar complex associated 4 homolog	ENSG00000184967, ENSG00000288146	12q24.33	No	Yes
NOMO2	NODAL modulator 2	ENSG00000185164	16p12.3	Yes	No
NOMO3	NODAL modulator 3	ENSG00000103226, ENSG00000278087	16p13.11	Yes	No
NONE	NA	NA	NA	No	Yes
NOTCH1	notch receptor 1	ENSG00000148400	9q34.3	No	Yes
NOTCH2NLB	notch 2 N-terminal like B	ENSG00000286019	1q21.2	Yes	No
NOXA1	NADPH oxidase activator 1	ENSG00000188747	9q34.3	No	Yes
NOXO1	NADPH oxidase organizer 1	ENSG00000196408	16p13.3	No	Yes
NPAT	nuclear protein, coactivator of histone transcription	ENSG00000149308	11q22.3	Yes	No
NPDC1	neural proliferation, differentiation and control 1	ENSG00000107281	9q34.3	No	Yes
NPHP1	nephrocystin 1	ENSG00000144061	2q13	Yes	No
NPHP3	nephrocystin 3	ENSG00000113971	3q22.1	Yes	No
NPIPA1	nuclear pore complex interacting protein family member A1	ENSG00000183426, ENSG00000281994	16p13.11	Yes	No
NPIPB12	nuclear pore complex interacting protein family member B12	ENSG00000169203	16p11.2	Yes	No
NPIPB15	nuclear pore complex interacting protein family member B15	ENSG00000196436	16q23.1	Yes	Yes
NPIPB8	nuclear pore complex interacting protein family member B8	ENSG00000255524	16p11.2	Yes	No
NPW	neuropeptide W	ENSG00000183971	16p13.3	No	Yes
NPY4R	neuropeptide Y receptor Y4	ENSG00000204174	10q11.22	Yes	No
NPY4R2	neuropeptide Y receptor Y4-2	ENSG00000264717, ENSG00000288157	10q11.22	Yes	No
NR3C1	nuclear receptor subfamily 3 group C member 1	ENSG00000113580	5q31.3	Yes	No
NRARP	NOTCH regulated ankyrin repeat protein	ENSG00000198435	9q34.3	No	Yes
NSD2	nuclear receptor binding SET domain protein 2	ENSG00000109685	4p16.3	No	Yes
NSMF	NMDA receptor synaptonuclear signaling and neuronal migration factor	ENSG00000165802	9q34.3	No	Yes
NT5C2	5'-nucleotidase, cytosolic II	ENSG00000076685	10q24.32-q24.33	Yes	No
NT5C3A	5'-nucleotidase, cytosolic IIIA	ENSG00000122643	7p14.3	Yes	No
NTS	neurotensin	ENSG00000133636	12q21.31	Yes	No
NUBP2	nucleotide binding protein 2	ENSG00000095906	16p13.3	No	Yes
NUCB2	nucleobindin 2	ENSG00000070081	11p15.1	Yes	No
NUCKS1	nuclear casein kinase and cyclin dependent kinase substrate 1	ENSG00000069275	1q32.1	Yes	No
NUDT14	nudix hydrolase 14	ENSG00000183828	14q32.33	No	Yes
NUP155	nucleoporin 155	ENSG00000113569	5p13.2	Yes	No
NUP85	nucleoporin 85	ENSG00000125450	17q25.1	Yes	No
NUP98	nucleoporin 98	ENSG00000110713	11p15.4	Yes	No
NUTM2A	NUT family member 2A	ENSG00000184923	10q23.2	Yes	No
NUTM2B	NUT family member 2B	ENSG00000188199	10q22.3	Yes	No
NUTM2D	NUT family member 2D	ENSG00000214562	10q23.2	Yes	No
NUTM2E	NUT family member 2E	ENSG00000228570	10q22.3	Yes	No
NYAP1	neuronal tyrosine phosphorylated phosphoinositide-3-kinase adaptor 1	ENSG00000166924	7q22.1	No	Yes
OBP2B	odorant binding protein 2B	ENSG00000171102, ENSG00000280584	9q34.2	Yes	No
OBSCN	obscurin, cytoskeletal calmodulin and titin-interacting RhoGEF	ENSG00000154358	1q42.13	No	Yes
OBSL1	obscurin like cytoskeletal adaptor 1	ENSG00000124006	2q35	No	Yes
ODF2L	outer dense fiber of sperm tails 2 like	ENSG00000122417	1p22.3	Yes	No
ODF3B	outer dense fiber of sperm tails 3B	ENSG00000177989	22q13.33	No	Yes
OFD1	OFD1 centriole and centriolar satellite protein	ENSG00000046651	Xp22.2	Yes	No
OGA	O-GlcNAcase	ENSG00000198408	10q24.32	Yes	No
OGFOD1	2-oxoglutarate and iron dependent oxygenase domain containing 1	ENSG00000087263	16q13	Yes	No
OGFOD2	2-oxoglutarate and iron dependent oxygenase domain containing 2	ENSG00000111325	12q24.31	No	Yes
OGN	osteoglycin	ENSG00000106809	9q22.31	Yes	No
OMD	osteomodulin	ENSG00000127083	9q22.31	Yes	No
OMG	oligodendrocyte myelin glycoprotein	ENSG00000126861	17q11.2	Yes	No
OPA1	OPA1 mitochondrial dynamin like GTPase	ENSG00000198836	3q29	Yes	No
OPHN1	oligophrenin 1	ENSG00000079482	Xq12	Yes	No
OR10A2	olfactory receptor family 10 subfamily A member 2	ENSG00000170790	11p15.4	Yes	Yes
OR10A4	olfactory receptor family 10 subfamily A member 4	ENSG00000170782	11p15.4	Yes	Yes
OR10A5	olfactory receptor family 10 subfamily A member 5	ENSG00000166363	11p15.4	Yes	Yes
OR10A7	olfactory receptor family 10 subfamily A member 7	ENSG00000179919	12q13.2	Yes	Yes
OR10AC1	olfactory receptor family 10 subfamily AC member 1 (gene/pseudogene)	ENSG00000176510, ENSG00000285252	7q35	Yes	No
OR10AG1	olfactory receptor family 10 subfamily AG member 1	ENSG00000174970	11q12.1	Yes	Yes
OR10D3	olfactory receptor family 10 subfamily D member 3 (putative)	ENSG00000197309	11q24.2	No	Yes
OR10G4	olfactory receptor family 10 subfamily G member 4	ENSG00000254737	11q24.2	No	Yes
OR10G6	olfactory receptor family 10 subfamily G member 6	ENSG00000198674	11q24.1	No	Yes
OR10G7	olfactory receptor family 10 subfamily G member 7	ENSG00000182634	11q24.2	No	Yes
OR10G8	olfactory receptor family 10 subfamily G member 8	ENSG00000234560	11q24.2	No	Yes
OR10G9	olfactory receptor family 10 subfamily G member 9	ENSG00000236981	11q24.2	No	Yes
OR10K1	olfactory receptor family 10 subfamily K member 1	ENSG00000173285	1q23.1	Yes	No
OR10K2	olfactory receptor family 10 subfamily K member 2	ENSG00000180708	1q23.1	Yes	No
OR10Q1	olfactory receptor family 10 subfamily Q member 1	ENSG00000180475	11q12.1	Yes	Yes
OR10R2	olfactory receptor family 10 subfamily R member 2	ENSG00000198965	1q23.1	Yes	No
OR10S1	olfactory receptor family 10 subfamily S member 1	ENSG00000196248	11q24.1	No	Yes
OR10T2	olfactory receptor family 10 subfamily T member 2	ENSG00000186306	1q23.1	Yes	No
OR10W1	olfactory receptor family 10 subfamily W member 1	ENSG00000172772	11q12.1	Yes	Yes
OR10X1	olfactory receptor family 10 subfamily X member 1 (gene/pseudogene)	ENSG00000279111	1q23.1	Yes	No
OR10Z1	olfactory receptor family 10 subfamily Z member 1	ENSG00000198967	1q23.1	Yes	No
OR11G2	olfactory receptor family 11 subfamily G member 2	ENSG00000196832	14q11.2	Yes	No
OR11H12	olfactory receptor family 11 subfamily H member 12	ENSG00000257115	14q11.2	Yes	No
OR11H2	olfactory receptor family 11 subfamily H member 2	ENSG00000258453	14q11.2	Yes	Yes
OR11H4	olfactory receptor family 11 subfamily H member 4	ENSG00000176198	14q11.2	Yes	No
OR11H6	olfactory receptor family 11 subfamily H member 6	ENSG00000176219	14q11.2	Yes	No
OR11H7	olfactory receptor family 11 subfamily H member 7 (gene/pseudogene)	NA	14q11.2	Yes	No
OR14C36	olfactory receptor family 14 subfamily C member 36	ENSG00000177174	1q44	No	Yes
OR1A1	olfactory receptor family 1 subfamily A member 1 (gene/pseudogene)	ENSG00000172146	17p13.3	Yes	Yes
OR1A2	olfactory receptor family 1 subfamily A member 2	ENSG00000172150	17p13.3	Yes	Yes
OR1D2	olfactory receptor family 1 subfamily D member 2	ENSG00000184166	17p13.3	Yes	Yes
OR1D4	olfactory receptor family 1 subfamily D member 4 (gene/pseudogene)	ENSG00000255095, ENSG00000262628	17p13.3	Yes	Yes
OR1D5	olfactory receptor family 1 subfamily D member 5	ENSG00000262628	17p13.3	No	Yes
OR1E1	olfactory receptor family 1 subfamily E member 1	ENSG00000180016	17p13.3	Yes	Yes
OR1E2	olfactory receptor family 1 subfamily E member 2	ENSG00000127780	17p13.2	Yes	Yes
OR1E3	olfactory receptor family 1 subfamily E member 3 (gene/pseudogene)	ENSG00000142163	17p13.3	Yes	Yes
OR1G1	olfactory receptor family 1 subfamily G member 1	ENSG00000183024	17p13.3	Yes	Yes
OR1S1	olfactory receptor family 1 subfamily S member 1 (gene/pseudogene)	ENSG00000280204	11q12.1	Yes	Yes
OR1S2	olfactory receptor family 1 subfamily S member 2	ENSG00000197887	11q12.1	Yes	Yes
OR2A1	olfactory receptor family 2 subfamily A member 1	ENSG00000221970, ENSG00000285105	7q35	Yes	Yes
OR2A14	olfactory receptor family 2 subfamily A member 14	ENSG00000221938, ENSG00000284891	7q35	Yes	No
OR2A42	olfactory receptor family 2 subfamily A member 42	ENSG00000212807, ENSG00000284836	7q35	Yes	Yes
OR2A7	olfactory receptor family 2 subfamily A member 7	ENSG00000243896, ENSG00000284749	7q35	Yes	Yes
OR2AG1	olfactory receptor family 2 subfamily AG member 1 (gene/pseudogene)	ENSG00000279486	11p15.4	Yes	Yes
OR2AG2	olfactory receptor family 2 subfamily AG member 2	ENSG00000188124	11p15.4	Yes	Yes
OR2AJ1	olfactory receptor family 2 subfamily AJ member 1	ENSG00000177275	1q44	No	Yes
OR2AK2	olfactory receptor family 2 subfamily AK member 2	ENSG00000187080	1q44	Yes	Yes
OR2AP1	olfactory receptor family 2 subfamily AP member 1	ENSG00000179615	12q13.2	Yes	Yes
OR2B3	olfactory receptor family 2 subfamily B member 3	ENSG00000204703, ENSG00000233054, ENSG00000206524, ENSG00000226832, ENSG00000225736, ENSG00000233180, ENSG00000231319, ENSG00000233687	6p22.1	No	Yes
OR2C1	olfactory receptor family 2 subfamily C member 1	ENSG00000168158	16p13.3	Yes	No
OR2D2	olfactory receptor family 2 subfamily D member 2	ENSG00000166368	11p15.4	Yes	Yes
OR2D3	olfactory receptor family 2 subfamily D member 3	ENSG00000178358	11p15.4	Yes	No
OR2G6	olfactory receptor family 2 subfamily G member 6	ENSG00000188558	1q44	No	Yes
OR2J1	olfactory receptor family 2 subfamily J member 1 (gene/pseudogene)	ENSG00000204702, ENSG00000234305, ENSG00000206523, ENSG00000235632, ENSG00000226192, ENSG00000234804, ENSG00000225441, ENSG00000226931	6p22.1	No	Yes
OR2J2	olfactory receptor family 2 subfamily J member 2	ENSG00000204700, ENSG00000225550, ENSG00000234746, ENSG00000226000, ENSG00000232945, ENSG00000231676, ENSG00000196231, ENSG00000226347	6p22.1	No	Yes
OR2J3	olfactory receptor family 2 subfamily J member 3	ENSG00000204701, ENSG00000226271, ENSG00000206522, ENSG00000233618, ENSG00000229866, ENSG00000232178, ENSG00000233636, ENSG00000230855	6p22.1	No	Yes
OR2L13	olfactory receptor family 2 subfamily L member 13	ENSG00000196071	1q44	Yes	Yes
OR2L2	olfactory receptor family 2 subfamily L member 2	ENSG00000203663	1q44	Yes	Yes
OR2L3	olfactory receptor family 2 subfamily L member 3	ENSG00000198128	1q44	Yes	Yes
OR2L5	olfactory receptor family 2 subfamily L member 5	ENSG00000197454	1q44	Yes	Yes
OR2L8	olfactory receptor family 2 subfamily L member 8 (gene/pseudogene)	ENSG00000279263	1q44	Yes	Yes
OR2M2	olfactory receptor family 2 subfamily M member 2	ENSG00000198601	1q44	Yes	Yes
OR2M3	olfactory receptor family 2 subfamily M member 3	ENSG00000228198	1q44	Yes	Yes
OR2M4	olfactory receptor family 2 subfamily M member 4	ENSG00000171180	1q44	Yes	Yes
OR2M5	olfactory receptor family 2 subfamily M member 5	ENSG00000162727	1q44	Yes	Yes
OR2M7	olfactory receptor family 2 subfamily M member 7	ENSG00000177186	1q44	No	Yes
OR2T1	olfactory receptor family 2 subfamily T member 1	ENSG00000175143, ENSG00000275244, ENSG00000273508	1q44	No	Yes
OR2T10	olfactory receptor family 2 subfamily T member 10	ENSG00000184022	1q44	Yes	Yes
OR2T11	olfactory receptor family 2 subfamily T member 11 (gene/pseudogene)	ENSG00000279301	1q44	Yes	Yes
OR2T12	olfactory receptor family 2 subfamily T member 12	ENSG00000177201	1q44	No	Yes
OR2T2	olfactory receptor family 2 subfamily T member 2	ENSG00000196240, ENSG00000276821, ENSG00000275754	1q44	No	Yes
OR2T27	olfactory receptor family 2 subfamily T member 27	ENSG00000187701	1q44	Yes	Yes
OR2T29	olfactory receptor family 2 subfamily T member 29	ENSG00000182783	1q44	Yes	Yes
OR2T3	olfactory receptor family 2 subfamily T member 3	ENSG00000196539, ENSG00000278377, ENSG00000277113	1q44	No	Yes
OR2T33	olfactory receptor family 2 subfamily T member 33	ENSG00000177212	1q44	No	Yes
OR2T34	olfactory receptor family 2 subfamily T member 34	ENSG00000183310	1q44	Yes	Yes
OR2T35	olfactory receptor family 2 subfamily T member 35	ENSG00000177151	1q44	Yes	Yes
OR2T4	olfactory receptor family 2 subfamily T member 4	ENSG00000196944, ENSG00000274870, ENSG00000275617	1q44	No	Yes
OR2T5	olfactory receptor family 2 subfamily T member 5	ENSG00000203661, ENSG00000273827, ENSG00000275102	1q44	Yes	Yes
OR2T6	olfactory receptor family 2 subfamily T member 6	ENSG00000198104, ENSG00000278689, ENSG00000278659	1q44	No	Yes
OR2T7	olfactory receptor family 2 subfamily T member 7	ENSG00000227152, ENSG00000281395, ENSG00000281489	1q44	No	Yes
OR2T8	olfactory receptor family 2 subfamily T member 8	ENSG00000177462	1q44	No	Yes
OR3A1	olfactory receptor family 3 subfamily A member 1 (gene/pseudogene)	ENSG00000180090	17p13.3	Yes	Yes
OR3A2	olfactory receptor family 3 subfamily A member 2	ENSG00000221882	17p13.3	Yes	Yes
OR3A3	olfactory receptor family 3 subfamily A member 3	ENSG00000159961	17p13.2	Yes	Yes
OR4A15	olfactory receptor family 4 subfamily A member 15	ENSG00000181958	11q11	Yes	Yes
OR4A16	olfactory receptor family 4 subfamily A member 16	ENSG00000181961	11q11	Yes	Yes
OR4A5	olfactory receptor family 4 subfamily A member 5	ENSG00000221840	11q11	Yes	No
OR4C11	olfactory receptor family 4 subfamily C member 11	ENSG00000172188	11q11	Yes	Yes
OR4C12	olfactory receptor family 4 subfamily C member 12	ENSG00000221954, ENSG00000284255	11p11.12	Yes	No
OR4C13	olfactory receptor family 4 subfamily C member 13	ENSG00000258817	11p11.12	Yes	No
OR4C15	olfactory receptor family 4 subfamily C member 15	ENSG00000181939	11q11	Yes	Yes
OR4C16	olfactory receptor family 4 subfamily C member 16 (gene/pseudogene)	ENSG00000279514	11q11	Yes	Yes
OR4C3	olfactory receptor family 4 subfamily C member 3	ENSG00000176547	11p11.2	No	Yes
OR4C45	olfactory receptor family 4 subfamily C member 45 (gene/pseudogene)	ENSG00000260811	11p11.12	Yes	No
OR4C46	olfactory receptor family 4 subfamily C member 46	ENSG00000185926	11q11	Yes	No
OR4C6	olfactory receptor family 4 subfamily C member 6	ENSG00000181903	11q11	Yes	Yes
OR4D5	olfactory receptor family 4 subfamily D member 5	ENSG00000171014	11q24.1	No	Yes
OR4F6	olfactory receptor family 4 subfamily F member 6	ENSG00000184140	15q26.3	No	Yes
OR4K1	olfactory receptor family 4 subfamily K member 1	ENSG00000155249	14q11.2	Yes	Yes
OR4K13	olfactory receptor family 4 subfamily K member 13	ENSG00000176253	14q11.2	Yes	Yes
OR4K14	olfactory receptor family 4 subfamily K member 14	ENSG00000169484	14q11.2	Yes	Yes
OR4K15	olfactory receptor family 4 subfamily K member 15	ENSG00000169488	14q11.2	Yes	Yes
OR4K17	olfactory receptor family 4 subfamily K member 17	ENSG00000176230	14q11.2	Yes	Yes
OR4K2	olfactory receptor family 4 subfamily K member 2	ENSG00000165762	14q11.2	Yes	Yes
OR4K3	olfactory receptor family 4 subfamily K member 3 (gene/pseudogene)	ENSG00000176290	14q11.2	Yes	Yes
OR4K5	olfactory receptor family 4 subfamily K member 5	ENSG00000176281	14q11.2	Yes	Yes
OR4L1	olfactory receptor family 4 subfamily L member 1 (gene/pseudogene)	ENSG00000176246	14q11.2	Yes	Yes
OR4M1	olfactory receptor family 4 subfamily M member 1	ENSG00000176299	14q11.2	Yes	Yes
OR4N2	olfactory receptor family 4 subfamily N member 2	ENSG00000176294	14q11.2	Yes	Yes
OR4N5	olfactory receptor family 4 subfamily N member 5	ENSG00000184394	14q11.2	Yes	Yes
OR4P4	olfactory receptor family 4 subfamily P member 4	ENSG00000181927	11q11	Yes	Yes
OR4Q2	olfactory receptor family 4 subfamily Q member 2 (gene/pseudogene)	NA	14q11.2	Yes	Yes
OR4Q3	olfactory receptor family 4 subfamily Q member 3	ENSG00000182652	14q11.2	Yes	Yes
OR4S1	olfactory receptor family 4 subfamily S member 1	ENSG00000176555	11p11.2	No	Yes
OR4S2	olfactory receptor family 4 subfamily S member 2	ENSG00000174982	11q11	Yes	Yes
OR4X1	olfactory receptor family 4 subfamily X member 1 (gene/pseudogene)	ENSG00000176567	11p11.2	No	Yes
OR4X2	olfactory receptor family 4 subfamily X member 2 (gene/pseudogene)	ENSG00000172208	11p11.2	No	Yes
OR52E4	olfactory receptor family 52 subfamily E member 4	ENSG00000180974	11p15.4	No	Yes
OR52E5	olfactory receptor family 52 subfamily E member 5	ENSG00000277932	11p15.4	No	Yes
OR52E6	olfactory receptor family 52 subfamily E member 6	ENSG00000205409	11p15.4	No	Yes
OR52E8	olfactory receptor family 52 subfamily E member 8	ENSG00000183269	11p15.4	No	Yes
OR5A1	olfactory receptor family 5 subfamily A member 1	ENSG00000172320	11q12.1	No	Yes
OR5A2	olfactory receptor family 5 subfamily A member 2	ENSG00000172324	11q12.1	No	Yes
OR5AC2	olfactory receptor family 5 subfamily AC member 2	ENSG00000196578	3q11.2	No	Yes
OR5AK2	olfactory receptor family 5 subfamily AK member 2	ENSG00000181273	11q12.1	Yes	No
OR5AL1	olfactory receptor family 5 subfamily AL member 1 (gene/pseudogene)	ENSG00000272987	11q12.1	Yes	No
OR5AN1	olfactory receptor family 5 subfamily AN member 1	ENSG00000176495	11q12.1	No	Yes
OR5AP2	olfactory receptor family 5 subfamily AP member 2	ENSG00000172464	11q12.1	Yes	Yes
OR5AR1	olfactory receptor family 5 subfamily AR member 1 (gene/pseudogene)	ENSG00000172459	11q12.1	Yes	No
OR5AS1	olfactory receptor family 5 subfamily AS member 1	ENSG00000181785	11q12.1	Yes	Yes
OR5B12	olfactory receptor family 5 subfamily B member 12	ENSG00000172362	11q12.1	Yes	Yes
OR5B17	olfactory receptor family 5 subfamily B member 17	ENSG00000197786	11q12.1	Yes	Yes
OR5B2	olfactory receptor family 5 subfamily B member 2	ENSG00000172365	11q12.1	Yes	Yes
OR5B21	olfactory receptor family 5 subfamily B member 21	ENSG00000198283	11q12.1	No	Yes
OR5B3	olfactory receptor family 5 subfamily B member 3	ENSG00000172769	11q12.1	Yes	Yes
OR5D13	olfactory receptor family 5 subfamily D member 13 (gene/pseudogene)	ENSG00000279761	11q11	Yes	Yes
OR5D14	olfactory receptor family 5 subfamily D member 14	ENSG00000186113	11q11	Yes	Yes
OR5D16	olfactory receptor family 5 subfamily D member 16	ENSG00000205029	11q12.1	Yes	Yes
OR5D18	olfactory receptor family 5 subfamily D member 18	ENSG00000186119	11q12.1	Yes	Yes
OR5F1	olfactory receptor family 5 subfamily F member 1	ENSG00000149133	11q12.1	Yes	Yes
OR5H1	olfactory receptor family 5 subfamily H member 1	ENSG00000231192	3q11.2	Yes	Yes
OR5H14	olfactory receptor family 5 subfamily H member 14	ENSG00000236032	3q11.2	Yes	Yes
OR5H15	olfactory receptor family 5 subfamily H member 15	ENSG00000233412	3q11.2	Yes	Yes
OR5H2	olfactory receptor family 5 subfamily H member 2	ENSG00000197938	3q11.2	Yes	Yes
OR5H6	olfactory receptor family 5 subfamily H member 6 (gene/pseudogene)	ENSG00000230301	3q11.2	Yes	Yes
OR5I1	olfactory receptor family 5 subfamily I member 1	ENSG00000167825	11q12.1	Yes	Yes
OR5J2	olfactory receptor family 5 subfamily J member 2	ENSG00000174957	11q12.1	Yes	Yes
OR5K1	olfactory receptor family 5 subfamily K member 1	ENSG00000232382	3q11.2	Yes	Yes
OR5K2	olfactory receptor family 5 subfamily K member 2	ENSG00000231861	3q11.2	Yes	Yes
OR5K3	olfactory receptor family 5 subfamily K member 3	ENSG00000206536	3q11.2	Yes	Yes
OR5K4	olfactory receptor family 5 subfamily K member 4	ENSG00000196098	3q11.2	Yes	Yes
OR5L1	olfactory receptor family 5 subfamily L member 1 (gene/pseudogene)	ENSG00000279395	11q12.1	Yes	Yes
OR5L2	olfactory receptor family 5 subfamily L member 2	ENSG00000205030	11q12.1	Yes	Yes
OR5M1	olfactory receptor family 5 subfamily M member 1	ENSG00000255012	11q12.1	Yes	Yes
OR5M10	olfactory receptor family 5 subfamily M member 10	ENSG00000254834	11q12.1	Yes	Yes
OR5M11	olfactory receptor family 5 subfamily M member 11	ENSG00000255223	11q12.1	Yes	Yes
OR5M3	olfactory receptor family 5 subfamily M member 3	ENSG00000174937	11q12.1	Yes	Yes
OR5M8	olfactory receptor family 5 subfamily M member 8	ENSG00000181371	11q12.1	Yes	Yes
OR5M9	olfactory receptor family 5 subfamily M member 9	ENSG00000150269	11q12.1	Yes	Yes
OR5R1	olfactory receptor family 5 subfamily R member 1 (gene/pseudogene)	ENSG00000279961	11q12.1	Yes	Yes
OR5T1	olfactory receptor family 5 subfamily T member 1	ENSG00000181698, ENSG00000262784	11q12.1	Yes	No
OR5T2	olfactory receptor family 5 subfamily T member 2	ENSG00000181718, ENSG00000262851	11q12.1	Yes	No
OR5T3	olfactory receptor family 5 subfamily T member 3	ENSG00000172489, ENSG00000261897	11q12.1	Yes	No
OR5W2	olfactory receptor family 5 subfamily W member 2	ENSG00000187612	11q12.1	Yes	Yes
OR6A2	olfactory receptor family 6 subfamily A member 2	ENSG00000184933	11p15.4	Yes	Yes
OR6C1	olfactory receptor family 6 subfamily C member 1	ENSG00000205330	12q13.2	Yes	Yes
OR6C2	olfactory receptor family 6 subfamily C member 2	ENSG00000179695	12q13.2	Yes	Yes
OR6C3	olfactory receptor family 6 subfamily C member 3	ENSG00000205329	12q13.2	Yes	No
OR6C4	olfactory receptor family 6 subfamily C member 4	ENSG00000179626	12q13.2	Yes	Yes
OR6C6	olfactory receptor family 6 subfamily C member 6	ENSG00000188324	12q13.2	Yes	Yes
OR6C65	olfactory receptor family 6 subfamily C member 65	ENSG00000205328	12q13.2	Yes	No
OR6C68	olfactory receptor family 6 subfamily C member 68	ENSG00000205327	12q13.2	Yes	Yes
OR6C70	olfactory receptor family 6 subfamily C member 70	ENSG00000184954	12q13.2	Yes	Yes
OR6C74	olfactory receptor family 6 subfamily C member 74	ENSG00000197706	12q13.2	Yes	Yes
OR6C75	olfactory receptor family 6 subfamily C member 75	ENSG00000187857	12q13.2	Yes	No
OR6C76	olfactory receptor family 6 subfamily C member 76	ENSG00000185821	12q13.2	Yes	Yes
OR6K2	olfactory receptor family 6 subfamily K member 2	ENSG00000196171	1q23.1	Yes	No
OR6K3	olfactory receptor family 6 subfamily K member 3	ENSG00000203757	1q23.1	Yes	No
OR6K6	olfactory receptor family 6 subfamily K member 6	ENSG00000180433	1q23.1	Yes	No
OR6N1	olfactory receptor family 6 subfamily N member 1	ENSG00000197403	1q23.1	Yes	No
OR6N2	olfactory receptor family 6 subfamily N member 2	ENSG00000188340	1q23.1	Yes	No
OR6P1	olfactory receptor family 6 subfamily P member 1	ENSG00000186440	1q23.1	Yes	No
OR6Q1	olfactory receptor family 6 subfamily Q member 1 (gene/pseudogene)	ENSG00000279051	11q12.1	No	Yes
OR6T1	olfactory receptor family 6 subfamily T member 1	ENSG00000181499	11q24.1	No	Yes
OR6Y1	olfactory receptor family 6 subfamily Y member 1	ENSG00000197532	1q23.1	Yes	No
OR7A10	olfactory receptor family 7 subfamily A member 10	ENSG00000127515	19p13.12	Yes	No
OR7A17	olfactory receptor family 7 subfamily A member 17	ENSG00000185385	19p13.12	Yes	No
OR7A5	olfactory receptor family 7 subfamily A member 5	ENSG00000188269	19p13.12	Yes	No
OR7C1	olfactory receptor family 7 subfamily C member 1	ENSG00000127530	19p13.12	Yes	No
OR7C2	olfactory receptor family 7 subfamily C member 2 (gene/pseudogene)	ENSG00000127529	19p13.12	Yes	No
OR8B2	olfactory receptor family 8 subfamily B member 2	ENSG00000284680	11q24.2	Yes	Yes
OR8B3	olfactory receptor family 8 subfamily B member 3	ENSG00000284609	11q24.2	Yes	Yes
OR8D1	olfactory receptor family 8 subfamily D member 1	ENSG00000196341	11q24.2	Yes	Yes
OR8D2	olfactory receptor family 8 subfamily D member 2 (gene/pseudogene)	ENSG00000279116	11q24.2	Yes	Yes
OR8G1	olfactory receptor family 8 subfamily G member 1 (gene/pseudogene)	ENSG00000197849	11q24.2	Yes	Yes
OR8G2P	olfactory receptor family 8 subfamily G member 2 pseudogene	ENSG00000181214	11q24.2	Yes	Yes
OR8G5	olfactory receptor family 8 subfamily G member 5	ENSG00000255298	11q24.2	Yes	Yes
OR8H1	olfactory receptor family 8 subfamily H member 1	ENSG00000181693, ENSG00000262611	11q12.1	Yes	No
OR8H2	olfactory receptor family 8 subfamily H member 2	ENSG00000181767	11q12.1	Yes	Yes
OR8H3	olfactory receptor family 8 subfamily H member 3	ENSG00000181761	11q12.1	Yes	Yes
OR8I2	olfactory receptor family 8 subfamily I member 2	ENSG00000172154	11q12.1	Yes	Yes
OR8J1	olfactory receptor family 8 subfamily J member 1	ENSG00000172487, ENSG00000262796	11q12.1	Yes	No
OR8J3	olfactory receptor family 8 subfamily J member 3	ENSG00000167822	11q12.1	Yes	Yes
OR8K1	olfactory receptor family 8 subfamily K member 1	ENSG00000150261, ENSG00000263328	11q12.1	Yes	No
OR8K3	olfactory receptor family 8 subfamily K member 3 (gene/pseudogene)	ENSG00000280314, ENSG00000262755	11q12.1	Yes	No
OR8K5	olfactory receptor family 8 subfamily K member 5	ENSG00000181752	11q12.1	Yes	Yes
OR8U1	olfactory receptor family 8 subfamily U member 1	ENSG00000172199	11q12.1	Yes	No
OR8U8	olfactory receptor family 8 subfamily U member 8	ENSG00000262315	11q11	Yes	No
OR9G1	olfactory receptor family 9 subfamily G member 1	ENSG00000174914, ENSG00000261958	11q12.1	Yes	No
OR9G4	olfactory receptor family 9 subfamily G member 4	ENSG00000172457, ENSG00000262647	11q12.1	Yes	No
OR9G9	olfactory receptor family 9 subfamily G member 9	ENSG00000262191	11q11	Yes	No
OR9I1	olfactory receptor family 9 subfamily I member 1	ENSG00000172377	11q12.1	No	Yes
OR9K2	olfactory receptor family 9 subfamily K member 2	ENSG00000170605	12q13.2	Yes	Yes
OR9Q1	olfactory receptor family 9 subfamily Q member 1	ENSG00000186509	11q12.1	No	Yes
OR9Q2	olfactory receptor family 9 subfamily Q member 2	ENSG00000186513	11q12.1	No	Yes
ORAI2	ORAI calcium release-activated calcium modulator 2	ENSG00000160991	7q22.1	No	Yes
ORC4	origin recognition complex subunit 4	ENSG00000115947	2q23.1	Yes	No
ORM1	orosomucoid 1	ENSG00000229314	9q32	Yes	Yes
OSBPL11	oxysterol binding protein like 11	ENSG00000144909	3q21.2	Yes	No
OSTM1	osteoclastogenesis associated transmembrane protein 1	ENSG00000081087	6q21	Yes	No
OTC	ornithine carbamoyltransferase	ENSG00000036473	Xp11.4	Yes	No
OTOG	otogelin	ENSG00000188162	11p15.1	No	Yes
OVCA2	OVCA2 serine hydrolase domain containing	ENSG00000262664	17p13.3	No	Yes
OVOS2	alpha-2-macroglobulin like 1 pseudogene	ENSG00000177359	12p11.21	Yes	No
OXSR1	oxidative stress responsive kinase 1	ENSG00000172939	3p22.2	Yes	No
OXT	oxytocin/neurophysin I prepropeptide	ENSG00000101405	20p13	No	Yes
P2RX2	purinergic receptor P2X 2	ENSG00000187848	12q24.33	No	Yes
P4HA1	prolyl 4-hydroxylase subunit alpha 1	ENSG00000122884	10q22.1	Yes	No
PAFAH1B1	platelet activating factor acetylhydrolase 1b regulatory subunit 1	ENSG00000007168	17p13.3	Yes	No
PALB2	partner and localizer of BRCA2	ENSG00000083093	16p12.2	Yes	No
PANO1	proapoptotic nucleolar protein 1	ENSG00000274897	11p15.5	No	Yes
PAPLN	papilin, proteoglycan like sulfated glycoprotein	ENSG00000100767	14q24.2	No	Yes
PARL	presenilin associated rhomboid like	ENSG00000175193, ENSG00000283765	3q27.1	Yes	No
PARN	poly(A)-specific ribonuclease	ENSG00000140694, ENSG00000274829	16p13.12	Yes	No
PAX9	paired box 9	ENSG00000198807	14q13.3	No	Yes
PAXBP1	PAX3 and PAX7 binding protein 1	ENSG00000159086, ENSG00000263141	21q22.11	Yes	No
PAXX	PAXX non-homologous end joining factor	ENSG00000148362	9q34.3	No	Yes
PC	pyruvate carboxylase	ENSG00000173599	11q13.2	No	Yes
PCDH11Y	protocadherin 11 Y-linked	ENSG00000099715	Yp11.2	Yes	No
PCDH15	protocadherin related 15	ENSG00000150275	10q21.1	Yes	No
PCDHA10	protocadherin alpha 10	ENSG00000250120	5q31.3	Yes	No
PCDHA11	protocadherin alpha 11	ENSG00000249158	5q31.3	Yes	No
PCDHA7	protocadherin alpha 7	ENSG00000204963	5q31.3	Yes	No
PCDHA8	protocadherin alpha 8	ENSG00000204962	5q31.3	Yes	No
PCDHA9	protocadherin alpha 9	ENSG00000204961	5q31.3	Yes	No
PCDHB10	protocadherin beta 10	ENSG00000120324	5q31.3	Yes	No
PCDHB11	protocadherin beta 11	ENSG00000197479	5q31.3	Yes	No
PCDHB16	protocadherin beta 16	ENSG00000272674	5q31.3	Yes	Yes
PCDHB5	protocadherin beta 5	ENSG00000113209	5q31.3	Yes	Yes
PCDHB6	protocadherin beta 6	ENSG00000113211	5q31.3	Yes	Yes
PCDHB7	protocadherin beta 7	ENSG00000113212	5q31.3	Yes	Yes
PCDHB8	protocadherin beta 8	ENSG00000120322	5q31.3	Yes	Yes
PCDHB9	protocadherin beta 9	ENSG00000177839	5q31.3	Yes	Yes
PCNX1	pecanex 1	ENSG00000100731	14q24.2	Yes	No
PCSK4	proprotein convertase subtilisin/kexin type 4	ENSG00000115257	19p13.3	No	Yes
PDCD10	programmed cell death 10	ENSG00000114209	3q26.1	Yes	No
PDCD2L	programmed cell death 2 like	ENSG00000126249	19q13.11	Yes	No
PDCL2	phosducin like 2	ENSG00000163440	4q12	Yes	No
PDE3B	phosphodiesterase 3B	ENSG00000152270	11p15.2	Yes	No
PDPR	pyruvate dehydrogenase phosphatase regulatory subunit	ENSG00000090857	16q22.1	Yes	Yes
PDX1	pancreatic and duodenal homeobox 1	ENSG00000139515	13q12.2	No	Yes
PDXDC1	pyridoxal dependent decarboxylase domain containing 1	ENSG00000179889, ENSG00000276709, ENSG00000275498	16p13.11	Yes	No
PDXDC2P-NPIPB14P	nuclear pore complex-interacting protein	ENSG00000196696	16q22.1	Yes	No
PER2	period circadian regulator 2	ENSG00000132326	2q37.3	No	Yes
PEX3	peroxisomal biogenesis factor 3	ENSG00000034693	6q24.2	Yes	No
PFKL	phosphofructokinase, liver type	ENSG00000141959	21q22.3	No	Yes
PGGHG	protein-glucosylgalactosylhydroxylysine glucosidase	ENSG00000142102	11p15.5	No	Yes
PGM2L1	phosphoglucomutase 2 like 1	ENSG00000165434	11q13.4	Yes	No
PHF20L1	PHD finger protein 20 like 1	ENSG00000129292	8q24.22	Yes	No
PHKB	phosphorylase kinase regulatory subunit beta	ENSG00000102893	16q12.1	Yes	No
PHOX2A	paired like homeobox 2A	ENSG00000165462	11q13.4	No	Yes
PHPT1	phosphohistidine phosphatase 1	ENSG00000054148	9q34.3	No	Yes
PI4KA	phosphatidylinositol 4-kinase alpha	ENSG00000241973	22q11.21	Yes	No
PICALM	phosphatidylinositol binding clathrin assembly protein	ENSG00000073921	11q14.2	Yes	No
PIDD1	p53-induced death domain protein 1	ENSG00000177595	11p15.5	No	Yes
PIGN	phosphatidylinositol glycan anchor biosynthesis class N	ENSG00000197563	18q21.33	Yes	No
PIGQ	phosphatidylinositol glycan anchor biosynthesis class Q	ENSG00000007541	16p13.3	No	Yes
PIGZ	phosphatidylinositol glycan anchor biosynthesis class Z	ENSG00000119227	3q29	No	Yes
PIK3C2A	phosphatidylinositol-4-phosphate 3-kinase catalytic subunit type 2 alpha	ENSG00000011405	11p15.1	Yes	No
PIK3R3	phosphoinositide-3-kinase regulatory subunit 3	ENSG00000117461	1p34.1	Yes	No
PIK3R4	phosphoinositide-3-kinase regulatory subunit 4	ENSG00000196455	3q22.1	Yes	No
PITPNB	phosphatidylinositol transfer protein beta	ENSG00000180957	22q12.1	Yes	No
PITPNM1	phosphatidylinositol transfer protein membrane associated 1	ENSG00000110697	11q13.2	No	Yes
PITPNM2	phosphatidylinositol transfer protein membrane associated 2	ENSG00000090975	12q24.31	No	Yes
PJVK	pejvakin	ENSG00000204311	2q31.2	Yes	No
PKD1	polycystin 1, transient receptor potential channel interacting	ENSG00000008710	16p13.3	No	Yes
PKD1P4-NPIPA8	PKD1P4-NPIPA8 readthrough	NA	NA	Yes	No
PKD2L2	polycystin 2 like 2, transient receptor potential cation channel	ENSG00000078795	5q31.2	Yes	No
PKP3	plakophilin 3	ENSG00000184363	11p15.5	No	Yes
PLA2G7	phospholipase A2 group VII	ENSG00000146070	6p12.3	Yes	No
PLCZ1	phospholipase C zeta 1	ENSG00000139151	12p12.3	Yes	No
PLEKHM1	pleckstrin homology and RUN domain containing M1	ENSG00000225190, ENSG00000277111, ENSG00000276358	17q21.31	Yes	No
PLEKHN1	pleckstrin homology domain containing N1	ENSG00000187583	1p36.33	No	Yes
PLIN1	perilipin 1	ENSG00000166819	15q26.1	No	Yes
PLOD2	procollagen-lysine,2-oxoglutarate 5-dioxygenase 2	ENSG00000152952	3q24	Yes	No
PLXNA1	plexin A1	ENSG00000114554	3q21.3	No	Yes
PLXNA3	plexin A3	ENSG00000130827	Xq28	No	Yes
PLXND1	plexin D1	ENSG00000004399	3q22.1	No	Yes
PMS2	PMS1 homolog 2, mismatch repair system component	ENSG00000122512	7p22.1	Yes	No
PNLIPRP3	pancreatic lipase related protein 3	ENSG00000203837	10q25.3	Yes	No
PNPLA2	patatin like phospholipase domain containing 2	ENSG00000177666	11p15.5	No	Yes
PNPLA7	patatin like phospholipase domain containing 7	ENSG00000130653	9q34.3	No	Yes
POLE	DNA polymerase epsilon, catalytic subunit	ENSG00000177084	12q24.33	No	Yes
POLH	DNA polymerase eta	ENSG00000170734	6p21.1	Yes	No
POLM	DNA polymerase mu	ENSG00000122678	7p13	No	Yes
POLN	DNA polymerase nu	ENSG00000130997	4p16.3	Yes	Yes
POLR2J2	RNA polymerase II subunit J2	ENSG00000267645, ENSG00000228049	7q22.1	Yes	No
POLR3B	RNA polymerase III subunit B	ENSG00000013503	12q23.3	Yes	No
POLRMT	RNA polymerase mitochondrial	ENSG00000099821	19p13.3	No	Yes
POM121C	POM121 transmembrane nucleoporin C	ENSG00000272391	7q11.23	Yes	Yes
POMZP3	POM121 and ZP3 fusion	ENSG00000146707, ENSG00000276464	7q11.23	Yes	No
PON1	paraoxonase 1	ENSG00000005421	7q21.3	Yes	No
PON2	paraoxonase 2	ENSG00000105854	7q21.3	Yes	No
PON3	paraoxonase 3	ENSG00000105852	7q21.3	Yes	No
POTEB3	POTE ankyrin domain family member B3	ENSG00000278522, ENSG00000278699	15q11.2	Yes	No
POTEC	POTE ankyrin domain family member C	ENSG00000183206	18p11.21	Yes	No
POTED	POTE ankyrin domain family member D	ENSG00000166351	21q11.2	Yes	No
POTEE	POTE ankyrin domain family member E	ENSG00000188219	2q21.1	Yes	No
POTEF	POTE ankyrin domain family member F	ENSG00000196604	2q21.1	Yes	No
POTEG	POTE ankyrin domain family member G	ENSG00000187537	14q11.2	Yes	No
POTEM	POTE ankyrin domain family member M	ENSG00000222036	14q11.2	Yes	Yes
POU5F1	POU class 5 homeobox 1	ENSG00000204531, ENSG00000237582, ENSG00000233911, ENSG00000235068, ENSG00000206454, ENSG00000229094, ENSG00000230336	6p21.33	No	Yes
PPARA	peroxisome proliferator activated receptor alpha	ENSG00000186951	22q13.31	Yes	No
PPDPF	pancreatic progenitor cell differentiation and proliferation factor	ENSG00000125534	20q13.33	No	Yes
PPIAL4A	peptidylprolyl isomerase A like 4A	ENSG00000263353	1p11.2	Yes	No
PPP1R16A	protein phosphatase 1 regulatory subunit 16A	ENSG00000160972	8q24.3	No	Yes
PPP1R3A	protein phosphatase 1 regulatory subunit 3A	ENSG00000154415	7q31.1	No	Yes
PPP2R2C	protein phosphatase 2 regulatory subunit Bgamma	ENSG00000074211	4p16.1	Yes	No
PPP4R4	protein phosphatase 4 regulatory subunit 4	ENSG00000119698, ENSG00000278326	14q32.12-q32.13	Yes	No
PPP6R3	protein phosphatase 6 regulatory subunit 3	ENSG00000110075	11q13.2	Yes	No
PRAMEF1	PRAME family member 1	ENSG00000116721	1p36.21	Yes	No
PRAMEF10	PRAME family member 10	ENSG00000187545, ENSG00000282663	1p36.21	Yes	No
PRAMEF11	PRAME family member 11	ENSG00000239810, ENSG00000281934	1p36.21	Yes	No
PRAMEF13	PRAME family member 13	ENSG00000279169, ENSG00000282741	1p36.21	Yes	No
PRAMEF14	PRAME family member 14	ENSG00000204481	1p36.21	Yes	No
PRAMEF15	PRAME family member 15	ENSG00000204501	1p36.21	Yes	No
PRAMEF17	PRAME family member 17	ENSG00000204479	1p36.21	Yes	No
PRAMEF18	PRAME family member 18	ENSG00000279804, ENSG00000277853, ENSG00000282212	1p36.21	Yes	No
PRAMEF19	PRAME family member 19	ENSG00000204480	1p36.21	Yes	No
PRAMEF2	PRAME family member 2	ENSG00000120952, ENSG00000282817	1p36.21	Yes	Yes
PRAMEF20	PRAME family member 20	ENSG00000204478	1p36.21	Yes	No
PRAMEF22	PRAME family member 22	ENSG00000277853	1p36.21	Yes	No
PRAMEF25	PRAME family member 25	ENSG00000229571, ENSG00000276299, ENSG00000282566, ENSG00000283348	1p36.21	Yes	No
PRAMEF26	PRAME family member 26	ENSG00000280267, ENSG00000229571, ENSG00000276299, ENSG00000282566, ENSG00000281987, ENSG00000283348, ENSG00000283216	1p36.21	Yes	No
PRAMEF27	PRAME family member 27	ENSG00000274764, ENSG00000282437, ENSG00000283425	1p36.21	Yes	No
PRAMEF33	PRAME family member 33	ENSG00000237700, ENSG00000276370, ENSG00000282125, ENSG00000283488	1p36.21	Yes	No
PRAMEF4	PRAME family member 4	ENSG00000243073, ENSG00000282584	1p36.21	Yes	Yes
PRAMEF5	PRAME family member 5	ENSG00000270601, ENSG00000276420, ENSG00000282424, ENSG00000283150	1p36.21	Yes	No
PRAMEF6	PRAME family member 6	ENSG00000232423, ENSG00000282119	1p36.21	Yes	No
PRAMEF7	PRAME family member 7	ENSG00000204510, ENSG00000279195	1p36.21	Yes	No
PRAMEF8	PRAME family member 8	ENSG00000182330, ENSG00000278021, ENSG00000282583, ENSG00000283387	1p36.21	Yes	No
PRAMEF9	PRAME family member 9	ENSG00000204505, ENSG00000281573, ENSG00000282298, ENSG00000283139	1p36.21	Yes	No
PREPL	prolyl endopeptidase like	ENSG00000138078	2p21	Yes	No
PRKRA	protein activator of interferon induced protein kinase EIF2AK2	ENSG00000180228	2q31.2	Yes	No
PRMT3	protein arginine methyltransferase 3	ENSG00000185238	11p15.1	Yes	No
PROS1	protein S	ENSG00000184500	3q11.1	Yes	No
PRPF39	pre-mRNA processing factor 39	ENSG00000185246	14q21.2	Yes	No
PRR23D1	proline rich 23 domain containing 1	ENSG00000255251, ENSG00000274540, ENSG00000284870	8p23.1	Yes	No
PRR23D2	proline rich 23 domain containing 2	ENSG00000255378, ENSG00000274540, ENSG00000255251, ENSG00000284870	8p23.1	Yes	No
PRR35	proline rich 35	ENSG00000161992	16p13.3	No	Yes
PRR36	proline rich 36	ENSG00000183248	19p13.2	No	Yes
PRRG4	proline rich and Gla domain 4	ENSG00000135378	11p13	Yes	No
PRRT3	proline rich transmembrane protein 3	ENSG00000163704	3p25.3	No	Yes
PRSS2	serine protease 2	ENSG00000275896, ENSG00000282049	7q34	Yes	No
PRSS56	serine protease 56	ENSG00000237412	2q37.1	No	Yes
PSG1	pregnancy specific beta-1-glycoprotein 1	ENSG00000231924	19q13.2	Yes	Yes
PSG11	pregnancy specific beta-1-glycoprotein 11	ENSG00000243130	19q13.31	Yes	Yes
PSG2	pregnancy specific beta-1-glycoprotein 2	ENSG00000242221	19q13.31	Yes	Yes
PSG3	pregnancy specific beta-1-glycoprotein 3	ENSG00000221826	19q13.2	Yes	Yes
PSG4	pregnancy specific beta-1-glycoprotein 4	ENSG00000243137	19q13.31	Yes	Yes
PSG5	pregnancy specific beta-1-glycoprotein 5	ENSG00000204941	19q13.31	Yes	Yes
PSG6	pregnancy specific beta-1-glycoprotein 6	ENSG00000170848	19q13.31	Yes	Yes
PSG7	pregnancy specific beta-1-glycoprotein 7 (gene/pseudogene)	ENSG00000221878	19q13.31	Yes	Yes
PSG8	pregnancy specific beta-1-glycoprotein 8	ENSG00000124467	19q13.2	Yes	Yes
PSG9	pregnancy specific beta-1-glycoprotein 9	ENSG00000183668	19q13.31	Yes	Yes
PSMA1	proteasome 20S subunit alpha 1	ENSG00000129084	11p15.2	Yes	No
PSPH	phosphoserine phosphatase	ENSG00000146733	7p11.2	Yes	No
PTGDS	prostaglandin D2 synthase	ENSG00000107317	9q34.3	No	Yes
PTGER3	prostaglandin E receptor 3	ENSG00000050628	1p31.1	Yes	No
PTGES3	prostaglandin E synthase 3	ENSG00000110958	12q13.3	Yes	No
PTK6	protein tyrosine kinase 6	ENSG00000101213	20q13.33	No	Yes
PTPN20	protein tyrosine phosphatase non-receptor type 20	ENSG00000204179	10q11.22	Yes	No
PTPRC	protein tyrosine phosphatase receptor type C	ENSG00000081237, ENSG00000262418	1q31.3-q32.1	Yes	No
PTPRH	protein tyrosine phosphatase receptor type H	ENSG00000080031	19q13.42	No	Yes
PTPRO	protein tyrosine phosphatase receptor type O	ENSG00000151490	12p12.3	Yes	No
PTPRQ	protein tyrosine phosphatase receptor type Q	ENSG00000139304	12q21.31	No	Yes
PTS	6-pyruvoyltetrahydropterin synthase	ENSG00000150787	11q23.1	Yes	No
PUDP	pseudouridine 5'-phosphatase	ENSG00000130021	Xp22.31	No	Yes
PUS1	pseudouridine synthase 1	ENSG00000177192	12q24.33	No	Yes
PUS7L	pseudouridine synthase 7 like	ENSG00000129317	12q12	Yes	No
PUSL1	pseudouridine synthase like 1	ENSG00000169972	1p36.33	No	Yes
PVALEF	parvalbumin like EF-hand containing	ENSG00000225180	17q25.3	No	Yes
PWP2	PWP2 small subunit processome component	ENSG00000241945	21q22.3	Yes	No
PYCR2	pyrroline-5-carboxylate reductase 2	ENSG00000143811	1q42.12	No	Yes
PYCR3	pyrroline-5-carboxylate reductase 3	ENSG00000104524, ENSG00000276657	8q24.3	No	Yes
PYDC5	pyrin domain containing 5	NA	1q23.1	Yes	No
PYHIN1	pyrin and HIN domain family member 1	ENSG00000163564	1q23.1	Yes	No
QSER1	glutamine and serine rich 1	ENSG00000060749	11p13	Yes	No
RAB18	RAB18, member RAS oncogene family	ENSG00000099246	10p12.1	Yes	No
RAB29	RAB29, member RAS oncogene family	ENSG00000117280	1q32.1	Yes	No
RAB3GAP1	RAB3 GTPase activating protein catalytic subunit 1	ENSG00000115839	2q21.3	Yes	No
RAB3GAP2	RAB3 GTPase activating non-catalytic protein subunit 2	ENSG00000118873	1q41	Yes	No
RABGAP1L	RAB GTPase activating protein 1 like	ENSG00000152061	1q25.1	Yes	No
RABGGTB	Rab geranylgeranyltransferase subunit beta	ENSG00000137955	1p31.1	Yes	No
RABL6	RAB, member RAS oncogene family like 6	ENSG00000196642	9q34.3	No	Yes
RAD21L1	RAD21 cohesin complex component like 1	ENSG00000244588	20p13	Yes	No
RAD50	RAD50 double strand break repair protein	ENSG00000113522	5q31.1	Yes	No
RAD51C	RAD51 paralog C	ENSG00000108384	17q22	Yes	No
RADIL	Rap associating with DIL domain	ENSG00000157927	7p22.1	No	Yes
RANBP2	RAN binding protein 2	ENSG00000153201	2q13	Yes	No
RARS2	arginyl-tRNA synthetase 2, mitochondrial	ENSG00000146282	6q15	Yes	No
RASA1	RAS p21 protein activator 1	ENSG00000145715	5q14.3	Yes	No
RASL10A	RAS like family 10 member A	ENSG00000100276	22q12.2	No	Yes
RASSF9	Ras association domain family member 9	ENSG00000198774	12q21.31	Yes	No
RB1	RB transcriptional corepressor 1	ENSG00000139687	13q14.2	Yes	No
RB1CC1	RB1 inducible coiled-coil 1	ENSG00000023287	8q11.23	Yes	No
RBBP6	RB binding protein 6, ubiquitin ligase	ENSG00000122257	16p12.1	Yes	No
RBBP7	RB binding protein 7, chromatin remodeling factor	ENSG00000102054	Xp22.2	Yes	No
RBBP8	RB binding protein 8, endonuclease	ENSG00000101773	18q11.2	Yes	No
RBL1	RB transcriptional corepressor like 1	ENSG00000080839	20q11.23	Yes	No
RBM25	RNA binding motif protein 25	ENSG00000119707	14q24.2	Yes	No
RBM28	RNA binding motif protein 28	ENSG00000106344	7q32.1	Yes	No
RBM39	RNA binding motif protein 39	ENSG00000131051	20q11.22	Yes	No
RBX1	ring-box 1	ENSG00000100387	22q13.2	Yes	No
RCOR1	REST corepressor 1	ENSG00000089902	14q32.31-q32.32	No	Yes
RDH16	retinol dehydrogenase 16	ENSG00000139547	12q13.3	Yes	No
RDX	radixin	ENSG00000137710	11q22.3	Yes	No
RECQL4	RecQ like helicase 4	ENSG00000160957	8q24.3	No	Yes
REEP6	receptor accessory protein 6	ENSG00000115255	19p13.3	No	Yes
RERG	RAS like estrogen regulated growth inhibitor	ENSG00000134533	12p12.3	Yes	No
RETREG1	reticulophagy regulator 1	ENSG00000154153	5p15.1	Yes	No
REXO5	RNA exonuclease 5	ENSG00000005189	16p12.3	Yes	No
RFLNA	refilin A	ENSG00000178882	12q24.31	No	Yes
RFPL4A	ret finger protein like 4A	ENSG00000223638	19q13.42	No	Yes
RFPL4AL1	ret finger protein like 4A like 1	ENSG00000229292	19q13.42	No	Yes
RFX6	regulatory factor X6	ENSG00000185002	6q22.1	Yes	No
RGPD3	RANBP2 like and GRIP domain containing 3	ENSG00000153165	2q12.2	Yes	No
RGS12	regulator of G protein signaling 12	ENSG00000159788	4p16.3	Yes	Yes
RHBDF1	rhomboid 5 homolog 1	ENSG00000007384	16p13.3	No	Yes
RHD	Rh blood group D antigen	ENSG00000187010	1p36.11	Yes	Yes
RHOA	ras homolog family member A	ENSG00000067560	3p21.31	No	Yes
RHPN1	rhophilin Rho GTPase binding protein 1	ENSG00000158106	8q24.3	No	Yes
RIMBP3	RIMS binding protein 3	ENSG00000275793	22q11.21	Yes	No
RIMBP3B	RIMS binding protein 3B	ENSG00000274600	22q11.21	Yes	No
RIMBP3C	RIMS binding protein 3C	ENSG00000183246	22q11.21	Yes	No
RLF	rearranged L-myc fusion	ENSG00000117000	1p34.2	Yes	No
RNF168	ring finger protein 168	ENSG00000163961	3q29	Yes	No
RNF208	ring finger protein 208	ENSG00000212864	9q34.3	No	Yes
RNF223	ring finger protein 223	ENSG00000237330	1p36.33	No	Yes
RNF224	ring finger protein 224	ENSG00000233198	9q34.3	No	Yes
RNF24	ring finger protein 24	ENSG00000101236	20p13	Yes	No
RNPC3	RNA binding region (RNP1, RRM) containing 3	ENSG00000185946	1p21.1	Yes	No
RNPEPL1	arginyl aminopeptidase like 1	ENSG00000142327	2q37.3	No	Yes
RP9	RP9 pre-mRNA splicing factor	ENSG00000164610	7p14.3	Yes	No
RPAP3	RNA polymerase II associated protein 3	ENSG00000005175	12q13.11	Yes	No
RPE65	retinoid isomerohydrolase RPE65	ENSG00000116745	1p31.3	No	Yes
RPGR	retinitis pigmentosa GTPase regulator	ENSG00000156313	Xp11.4	Yes	No
RPGRIP1L	RPGRIP1 like	ENSG00000103494	16q12.2	Yes	No
RPL10L	ribosomal protein L10 like	ENSG00000165496	14q21.2	Yes	No
RPL17-C18orf32	RPL17-C18orf32 readthrough	ENSG00000215472	18q21.1	Yes	No
RPS19	ribosomal protein S19	ENSG00000105372	19q13.2	Yes	No
RPS6KA3	ribosomal protein S6 kinase A3	ENSG00000177189	Xp22.12	Yes	No
RPS6KA4	ribosomal protein S6 kinase A4	ENSG00000162302	11q13.1	No	Yes
RPSAP58	ribosomal protein SA pseudogene 58	NA	19p12	Yes	No
RRAGC	Ras related GTP binding C	ENSG00000116954	1p34.3	Yes	No
RRM2B	ribonucleotide reductase regulatory TP53 inducible subunit M2B	ENSG00000048392	8q22.3	Yes	No
RRN3P2	RRN3 homolog, RNA polymerase I transcription factor pseudogene 2	ENSG00000103472	16p11.2	Yes	Yes
RRP7A	ribosomal RNA processing 7 homolog A	ENSG00000189306	22q13.2	Yes	Yes
RSL1D1	ribosomal L1 domain containing 1	ENSG00000171490	16p13.13	Yes	No
RSPH10B	radial spoke head 10 homolog B	ENSG00000155026	7p22.1	Yes	Yes
RSPH10B2	radial spoke head 10 homolog B2	ENSG00000169402	7p22.1	Yes	Yes
RSPRY1	ring finger and SPRY domain containing 1	ENSG00000159579	16q13	Yes	No
RSRC2	arginine and serine rich coiled-coil 2	ENSG00000111011	12q24.31	Yes	No
RSRP1	arginine and serine rich protein 1	ENSG00000117616	1p36.11	Yes	No
RTN3	reticulon 3	ENSG00000133318	11q13.1	No	Yes
RXRA	retinoid X receptor alpha	ENSG00000186350	9q34.2	No	Yes
SAE1	SUMO1 activating enzyme subunit 1	ENSG00000142230	19q13.32	Yes	No
SAMHD1	SAM and HD domain containing deoxynucleoside triphosphate triphosphohydrolase 1	ENSG00000101347	20q11.23	Yes	No
SAPCD2	suppressor APC domain containing 2	ENSG00000186193	9q34.3	No	Yes
SARAF	store-operated calcium entry associated regulatory factor	ENSG00000133872	8p12	Yes	No
SBDS	SBDS ribosome maturation factor	ENSG00000126524	7q11.21	Yes	No
SBF2	SET binding factor 2	ENSG00000133812	11p15.4	Yes	No
SBNO2	strawberry notch homolog 2	ENSG00000064932, ENSG00000278788	19p13.3	No	Yes
SC5D	sterol-C5-desaturase	ENSG00000109929	11q23.3-q24.1	Yes	No
SCAP	SREBF chaperone	ENSG00000114650	3p21.31	No	Yes
SCARB1	scavenger receptor class B member 1	ENSG00000073060	12q24.31	No	Yes
SCART1	scavenger receptor family member expressed on T cells 1	ENSG00000214279	10q26.3	No	Yes
SCLY	selenocysteine lyase	ENSG00000132330	2q37.3	Yes	Yes
SCN1A	sodium voltage-gated channel alpha subunit 1	ENSG00000144285	2q24.3	Yes	Yes
SCN2A	sodium voltage-gated channel alpha subunit 2	ENSG00000136531	2q24.3	Yes	No
SCN3A	sodium voltage-gated channel alpha subunit 3	ENSG00000153253	2q24.3	Yes	No
SCNN1D	sodium channel epithelial 1 delta subunit	ENSG00000162572	1p36.33	No	Yes
SCO1	SCO cytochrome c oxidase assembly protein 1	ENSG00000133028	17p13.1	Yes	No
SCP2	sterol carrier protein 2	ENSG00000116171	1p32.3	Yes	No
SCRT2	scratch family transcriptional repressor 2	ENSG00000215397	20p13	No	Yes
SCYL1	SCY1 like pseudokinase 1	ENSG00000142186	11q13.1	No	Yes
SDF4	stromal cell derived factor 4	ENSG00000078808	1p36.33	No	Yes
SDHAP2	succinate dehydrogenase complex flavoprotein subunit A pseudogene 2	ENSG00000242086	3q29	Yes	Yes
SDHB	succinate dehydrogenase complex iron sulfur subunit B	ENSG00000117118	1p36.13	Yes	No
SDR9C7	short chain dehydrogenase/reductase family 9C member 7	ENSG00000170426	12q13.3	Yes	No
SEC16A	SEC16 homolog A, endoplasmic reticulum export factor	ENSG00000148396	9q34.3	No	Yes
SEC63	SEC63 homolog, protein translocation regulator	ENSG00000025796	6q21	Yes	No
SECISBP2	SECIS binding protein 2	ENSG00000187742	9q22.2	Yes	No
SENP6	SUMO specific peptidase 6	ENSG00000112701	6q14.1	Yes	No
SERPINI1	serpin family I member 1	ENSG00000163536	3q26.1	Yes	No
SERTAD4	SERTA domain containing 4	ENSG00000082497, ENSG00000281230	1q32.2	Yes	No
SESN3	sestrin 3	ENSG00000149212	11q21	Yes	No
SET	SET nuclear proto-oncogene	ENSG00000119335	9q34.11	Yes	No
SETD1B	SET domain containing 1B, histone lysine methyltransferase	ENSG00000139718	12q24.31	No	Yes
SETX	senataxin	ENSG00000107290	9q34.13	Yes	No
SFI1	SFI1 centrin binding protein	ENSG00000198089	22q12.2	Yes	No
SFR1	SWI5 dependent homologous recombination repair protein 1	ENSG00000156384	10q25.1	Yes	No
SFSWAP	splicing factor SWAP	ENSG00000061936	12q24.33	No	Yes
SFTPD	surfactant protein D	ENSG00000133661	10q22.3	Yes	No
SH3BP2	SH3 domain binding protein 2	ENSG00000087266	4p16.3	Yes	No
SH3D21	SH3 domain containing 21	ENSG00000214193	1p34.3	No	Yes
SH3PXD2A	SH3 and PX domains 2A	ENSG00000107957	10q24.33	No	Yes
SHCBP1L	SHC binding and spindle associated 1 like	ENSG00000157060	1q25.3	Yes	No
SHLD2	shieldin complex subunit 2	ENSG00000122376	10q23.2	Yes	No
SHOC1	shortage in chiasmata 1	ENSG00000165181	9q31.3	Yes	No
SHOC2	SHOC2 leucine rich repeat scaffold protein	ENSG00000108061	10q25.2	Yes	No
SHROOM2	shroom family member 2	ENSG00000146950	Xp22.2	No	Yes
SI	sucrase-isomaltase	ENSG00000090402	3q26.1	Yes	No
SIGLEC1	sialic acid binding Ig like lectin 1	ENSG00000088827	20p13	No	Yes
SIGLEC14	sialic acid binding Ig like lectin 14	ENSG00000254415	19q13.41	Yes	Yes
SIGLEC16	sialic acid binding Ig like lectin 16 (gene/pseudogene)	ENSG00000161643	19q13.33	Yes	No
SIK1	salt inducible kinase 1	ENSG00000142178	21q22.3	No	Yes
SIK1B	salt inducible kinase 1B (putative)	ENSG00000275993	21p12	No	Yes
SIPA1	signal-induced proliferation-associated 1	ENSG00000213445	11q13.1	No	Yes
SIRPB1	signal regulatory protein beta 1	ENSG00000101307	20p13	Yes	Yes
SIRPG	signal regulatory protein gamma	ENSG00000089012	20p13	Yes	No
SKA2	spindle and kinetochore associated complex subunit 2	ENSG00000182628	17q22	Yes	No
SKA3	spindle and kinetochore associated complex subunit 3	ENSG00000165480	13q12.11	Yes	Yes
SLC11A1	solute carrier family 11 member 1	ENSG00000018280	2q35	No	Yes
SLC12A6	solute carrier family 12 member 6	ENSG00000140199	15q14	Yes	No
SLC16A4	solute carrier family 16 member 4	ENSG00000168679	1p13.3	Yes	No
SLC17A6	solute carrier family 17 member 6	ENSG00000091664	11p14.3	Yes	No
SLC19A1	solute carrier family 19 member 1	ENSG00000173638	21q22.3	No	Yes
SLC25A12	solute carrier family 25 member 12	ENSG00000115840	2q31.1	Yes	No
SLC25A13	solute carrier family 25 member 13	ENSG00000004864	7q21.3	Yes	No
SLC25A17	solute carrier family 25 member 17	ENSG00000100372	22q13.2	Yes	No
SLC25A24	solute carrier family 25 member 24	ENSG00000085491, ENSG00000284468	1p13.3	Yes	No
SLC25A3	solute carrier family 25 member 3	ENSG00000075415	12q23.1	Yes	No
SLC26A1	solute carrier family 26 member 1	ENSG00000145217	4p16.3	Yes	Yes
SLC29A4	solute carrier family 29 member 4	ENSG00000164638	7p22.1	No	Yes
SLC2A3	solute carrier family 2 member 3	ENSG00000059804	12p13.31	Yes	No
SLC34A3	solute carrier family 34 member 3	ENSG00000198569	9q34.3	No	Yes
SLC35A1	solute carrier family 35 member A1	ENSG00000164414	6q15	Yes	No
SLC35A3	solute carrier family 35 member A3	ENSG00000117620	1p21.2	Yes	No
SLC35D1	solute carrier family 35 member D1	ENSG00000116704	1p31.3	Yes	No
SLC35E2A	solute carrier family 35 member E2A	ENSG00000215790	1p36.33	Yes	No
SLC38A10	solute carrier family 38 member 10	ENSG00000157637	17q25.3	No	Yes
SLC4A4	solute carrier family 4 member 4	ENSG00000080493	4q13.3	No	Yes
SLC66A2	solute carrier family 66 member 2	ENSG00000122490	18q23	No	Yes
SLC6A10P	solute carrier family 6 member 10, pseudogene	ENSG00000214617	16p11.2	No	Yes
SLC7A7	solute carrier family 7 member 7	ENSG00000155465	14q11.2	Yes	No
SLC9A3R2	SLC9A3 regulator 2	ENSG00000065054	16p13.3	No	Yes
SLC9C1	solute carrier family 9 member C1	ENSG00000172139, ENSG00000285044	3q13.2	Yes	No
SLCO1A2	solute carrier organic anion transporter family member 1A2	ENSG00000084453	12p12.1	Yes	No
SLCO1B1	solute carrier organic anion transporter family member 1B1	ENSG00000134538	12p12.1	Yes	No
SLCO1B3	solute carrier organic anion transporter family member 1B3	ENSG00000111700	12p12.2	Yes	No
SLCO1B3-SLCO1B7	SLCO1B3-SLCO1B7 readthrough	NA	12p12.2	Yes	No
SLCO1B7	solute carrier organic anion transporter family member 1B7 (putative)	ENSG00000205754	12p12.2	Yes	No
SLCO1C1	solute carrier organic anion transporter family member 1C1	ENSG00000139155	12p12.2	Yes	No
SLF2	SMC5-SMC6 complex localization factor 2	ENSG00000119906	10q24.31	Yes	No
SLFN11	schlafen family member 11	ENSG00000172716	17q12	Yes	No
SLFN12	schlafen family member 12	ENSG00000172123	17q12	Yes	No
SLFN12L	schlafen family member 12 like	ENSG00000205045	17q12	Yes	No
SLFN13	schlafen family member 13	ENSG00000154760	17q12	Yes	No
SLITRK3	SLIT and NTRK like family member 3	ENSG00000121871	3q26.1	Yes	No
SLITRK4	SLIT and NTRK like family member 4	ENSG00000179542	Xq27.3	No	Yes
SMAD2	SMAD family member 2	ENSG00000175387	18q21.1	Yes	No
SMAD4	SMAD family member 4	ENSG00000141646	18q21.2	No	Yes
SMARCAD1	SWI/SNF-related, matrix-associated actin-dependent regulator of chromatin, subfamily a, containing DEAD/H box 1	ENSG00000163104	4q22.3	Yes	No
SMC1B	structural maintenance of chromosomes 1B	ENSG00000077935	22q13.31	Yes	No
SMC3	structural maintenance of chromosomes 3	ENSG00000108055	10q25.2	Yes	No
SMC4	structural maintenance of chromosomes 4	ENSG00000113810	3q25.33	Yes	No
SMC5	structural maintenance of chromosomes 5	ENSG00000198887	9q21.12	Yes	No
SMC6	structural maintenance of chromosomes 6	ENSG00000163029	2p24.2	Yes	No
SMG1	SMG1 nonsense mediated mRNA decay associated PI3K related kinase	ENSG00000157106	16p12.3	Yes	No
SNAP25	synaptosome associated protein 25	ENSG00000132639	20p12.2	Yes	No
SNED1	sushi, nidogen and EGF like domains 1	ENSG00000162804	2q37.3	No	Yes
SNHG14	small nucleolar RNA host gene 14	NA	15q11.2	No	Yes
SNORD115-10	small nucleolar RNA, C/D box 115-10	ENSG00000201943	15q11.2	No	Yes
SNORD115-12	small nucleolar RNA, C/D box 115-12	ENSG00000199453	15q11.2	No	Yes
SNORD115-3	small nucleolar RNA, C/D box 115-3	ENSG00000199970	15q11.2	No	Yes
SNORD115-4	small nucleolar RNA, C/D box 115-4	ENSG00000200680	15q11.2	No	Yes
SNORD115-5	small nucleolar RNA, C/D box 115-5	ENSG00000200503	15q11.2	No	Yes
SNORD115-6	small nucleolar RNA, C/D box 115-6	ENSG00000200812	15q11.2	No	Yes
SNORD115-7	small nucleolar RNA, C/D box 115-7	ENSG00000278089	15q11.2	No	Yes
SNORD115-8	small nucleolar RNA, C/D box 115-8	ENSG00000200726	15q11.2	No	Yes
SNORD115-9	small nucleolar RNA, C/D box 115-9	ENSG00000199782	15q11.2	No	Yes
SNORD116-1	small nucleolar RNA, C/D box 116-1	ENSG00000207063	15q11.2	No	Yes
SNORD116-2	small nucleolar RNA, C/D box 116-2	ENSG00000207001	15q11.2	No	Yes
SNORD116-3	small nucleolar RNA, C/D box 116-3	ENSG00000207014	15q11.2	No	Yes
SNORD116-4	small nucleolar RNA, C/D box 116-4	ENSG00000275529	15q11.2	No	Yes
SNORD116-5	small nucleolar RNA, C/D box 116-5	ENSG00000207191	15q11.2	No	Yes
SNORD116-6	small nucleolar RNA, C/D box 116-6	ENSG00000207442	15q11.2	No	Yes
SNORD116-7	small nucleolar RNA, C/D box 116-7	ENSG00000207133	15q11.2	No	Yes
SNORD116-8	small nucleolar RNA, C/D box 116-8	ENSG00000207093	15q11.2	No	Yes
SNORD116-9	small nucleolar RNA, C/D box 116-9	ENSG00000206727	15q11.2	No	Yes
SOHLH1	spermatogenesis and oogenesis specific basic helix-loop-helix 1	ENSG00000165643	9q34.3	No	Yes
SOS1	SOS Ras/Rac guanine nucleotide exchange factor 1	ENSG00000115904	2p22.1	Yes	No
SOX18	SRY-box transcription factor 18	ENSG00000203883	20q13.33	No	Yes
SOX8	SRY-box transcription factor 8	ENSG00000005513	16p13.3	No	Yes
SPAG11A	sperm associated antigen 11A	ENSG00000178287, ENSG00000285507	8p23.1	Yes	No
SPAG11B	sperm associated antigen 11B	ENSG00000164871, ENSG00000274405, ENSG00000288309	8p23.1	Yes	No
SPANXA1	sperm protein associated with the nucleus, X-linked, family member A1	ENSG00000198021	Xq27.2	No	Yes
SPANXA2	SPANX family member A2	ENSG00000203926	Xq27.2	No	Yes
SPANXB1	SPANX family member B1	ENSG00000227234	Xq27.1	No	Yes
SPANXC	SPANX family member C	ENSG00000198573	Xq27.2	No	Yes
SPANXN2	SPANX family member N2	ENSG00000268988	Xq27.3	No	Yes
SPANXN3	SPANX family member N3	ENSG00000189252	Xq27.3	No	Yes
SPAST	spastin	ENSG00000021574	2p22.3	Yes	No
SPATA16	spermatogenesis associated 16	ENSG00000144962	3q26.31	Yes	No
SPATA22	spermatogenesis associated 22	ENSG00000141255	17p13.2	Yes	No
SPATA31A5	SPATA31 subfamily A member 5	ENSG00000276581	9q12	Yes	No
SPATA31A6	SPATA31 subfamily A member 6	ENSG00000185775	9p11.2	Yes	No
SPATA31A7	SPATA31 subfamily A member 7	ENSG00000276040	9q12	Yes	No
SPATA45	spermatogenesis associated 45	ENSG00000185523	1q32.3	Yes	No
SPATA48	spermatogenesis associated 48	ENSG00000164500	7p12.2	Yes	No
SPDYE16	speedy/RINGO cell cycle regulator family member E16	ENSG00000185040, ENSG00000281950	7q11.23	Yes	No
SPECC1L	sperm antigen with calponin homology and coiled-coil domains 1 like	ENSG00000100014	22q11.23	Yes	No
SPEG	striated muscle enriched protein kinase	ENSG00000072195	2q35	No	Yes
SPEN	spen family transcriptional repressor	ENSG00000065526	1p36.21-p36.13	Yes	No
SPG11	SPG11 vesicle trafficking associated, spatacsin	ENSG00000104133	15q21.1	Yes	No
SPO11	SPO11 initiator of meiotic double stranded breaks	ENSG00000054796	20q13.31	Yes	No
SPPL2C	signal peptide peptidase like 2C	ENSG00000185294, ENSG00000278194, ENSG00000277106	17q21.31	Yes	No
SPR	sepiapterin reductase	ENSG00000116096	2p13.2	No	Yes
SPRTN	SprT-like N-terminal domain	ENSG00000010072	1q42.2	Yes	No
SPSB3	splA/ryanodine receptor domain and SOCS box containing 3	ENSG00000162032	16p13.3	No	Yes
SPTA1	spectrin alpha, erythrocytic 1	ENSG00000163554	1q23.1	Yes	No
SPTLC1	serine palmitoyltransferase long chain base subunit 1	ENSG00000090054	9q22.31	Yes	No
SRGAP2C	SLIT-ROBO Rho GTPase activating protein 2C	ENSG00000171943	1p11.2	Yes	No
SRMS	src-related kinase lacking C-terminal regulatory tyrosine and N-terminal myristylation sites	ENSG00000125508	20q13.33	No	Yes
SRSF7	serine and arginine rich splicing factor 7	ENSG00000115875	2p22.1	Yes	No
SRXN1	sulfiredoxin 1	ENSG00000271303	20p13	No	Yes
SSNA1	SS nuclear autoantigen 1	ENSG00000176101	9q34.3	No	Yes
SSPO	SCO-spondin	ENSG00000197558	7q36.1	No	Yes
SSTR5	somatostatin receptor 5	ENSG00000162009	16p13.3	No	Yes
SSU72	SSU72 homolog, RNA polymerase II CTD phosphatase	ENSG00000160075	1p36.33	No	Yes
ST13	ST13 Hsp70 interacting protein	ENSG00000100380	22q13.2	Yes	No
ST8SIA6	ST8 alpha-N-acetyl-neuraminide alpha-2,8-sialyltransferase 6	ENSG00000148488	10p12.33	Yes	No
STAT5B	signal transducer and activator of transcription 5B	ENSG00000173757	17q21.2	Yes	No
STH	saitohin	ENSG00000256762, ENSG00000281139	17q21.31	Yes	No
STIL	STIL centriolar assembly protein	ENSG00000123473	1p33	Yes	No
STK11	serine/threonine kinase 11	ENSG00000118046	19p13.3	No	Yes
STK4	serine/threonine kinase 4	ENSG00000101109	20q13.12	Yes	No
STPG3	sperm-tail PG-rich repeat containing 3	ENSG00000197768	9q34.3	No	Yes
STS	steroid sulfatase	ENSG00000101846	Xp22.31	No	Yes
STX19	syntaxin 19	ENSG00000178750	3q11.2	Yes	No
STXBP4	syntaxin binding protein 4	ENSG00000166263	17q22	Yes	No
STXBP5L	syntaxin binding protein 5 like	ENSG00000145087	3q13.33	Yes	No
SUCLA2	succinate-CoA ligase ADP-forming beta subunit	ENSG00000136143	13q14.2	Yes	No
SUCO	SUN domain containing ossification factor	ENSG00000094975	1q24.3	Yes	No
SULT1A1	sulfotransferase family 1A member 1	ENSG00000196502	16p11.2	Yes	Yes
SULT2A1	sulfotransferase family 2A member 1	ENSG00000105398	19q13.33	Yes	No
SUZ12	SUZ12 polycomb repressive complex 2 subunit	ENSG00000178691	17q11.2	Yes	No
SWT1	SWT1 RNA endoribonuclease homolog	ENSG00000116668	1q25.3	Yes	No
SYCP1	synaptonemal complex protein 1	ENSG00000198765	1p13.2	Yes	No
SYCP2	synaptonemal complex protein 2	ENSG00000196074	20q13.33	Yes	No
SYCP3	synaptonemal complex protein 3	ENSG00000139351	12q23.2	Yes	No
SYNE2	spectrin repeat containing nuclear envelope protein 2	ENSG00000054654	14q23.2	Yes	No
SYNGR3	synaptogyrin 3	ENSG00000127561	16p13.3	No	Yes
SYT14	synaptotagmin 14	ENSG00000143469	1q32.2	Yes	No
SYT15	synaptotagmin 15	ENSG00000204176	10q11.22	Yes	No
TADA2A	transcriptional adaptor 2A	ENSG00000276234, ENSG00000277104	17q12	Yes	No
TAF2	TATA-box binding protein associated factor 2	ENSG00000064313	8q24.12	Yes	No
TAF3	TATA-box binding protein associated factor 3	ENSG00000165632	10p14	No	Yes
TAF4	TATA-box binding protein associated factor 4	ENSG00000130699, ENSG00000280529	20q13.33	No	Yes
TAOK1	TAO kinase 1	ENSG00000160551	17q11.2	Yes	No
TAS1R3	taste 1 receptor member 3	ENSG00000169962	1p36.33	No	Yes
TAS2R41	taste 2 receptor member 41	ENSG00000221855, ENSG00000284982	7q35	Yes	No
TAS2R60	taste 2 receptor member 60	ENSG00000185899, ENSG00000285341	7q35	Yes	No
TASP1	taspase 1	ENSG00000089123	20p12.1	Yes	No
TATDN3	TatD DNase domain containing 3	ENSG00000203705	1q32.3	Yes	No
TBC1D32	TBC1 domain family member 32	ENSG00000146350	6q22.31	Yes	No
TBC1D3B	TBC1 domain family member 3B	ENSG00000274808, ENSG00000282750, ENSG00000278632, ENSG00000274939	17q12	Yes	No
TBC1D3D	TBC1 domain family member 3D	ENSG00000274419	17q12	Yes	No
TBC1D3F	TBC1 domain family member 3F	ENSG00000275954, ENSG00000282087	17q12	Yes	No
TBC1D3G	TBC1 domain family member 3G	ENSG00000260287, ENSG00000275760	17q12	Yes	No
TBC1D3H	TBC1 domain family member 3H	ENSG00000274226, ENSG00000277974	17q12	Yes	No
TBC1D3I	TBC1 domain family member 3I	ENSG00000274933, ENSG00000275861, ENSG00000282144	17q12	Yes	No
TBC1D3K	TBC1 domain family member 3K	ENSG00000273513, ENSG00000275153	17q12	Yes	No
TBC1D3L	TBC1 domain family member 3L	ENSG00000274512, ENSG00000276349	17q12	Yes	No
TBCE	tubulin folding cofactor E	ENSG00000284770, ENSG00000285053, ENSG00000282984	1q42.3	Yes	No
TBL1Y	transducin beta like 1 Y-linked	ENSG00000092377	Yp11.2	No	Yes
TBL3	transducin beta like 3	ENSG00000183751	16p13.3	No	Yes
TBX3	T-box transcription factor 3	ENSG00000135111	12q24.21	Yes	No
TBXA2R	thromboxane A2 receptor	ENSG00000006638	19p13.3	No	Yes
TCAF2	TRPM8 channel associated factor 2	ENSG00000170379	7q35	Yes	Yes
TCEA2	transcription elongation factor A2	ENSG00000171703	20q13.33	No	Yes
TCF15	transcription factor 15	ENSG00000125878	20p13	No	Yes
TCF19	transcription factor 19	ENSG00000137310, ENSG00000234674, ENSG00000224379, ENSG00000224472, ENSG00000206455, ENSG00000233890, ENSG00000224941	6p21.33	No	Yes
TCP10	t-complex 10	ENSG00000203690	6q27	Yes	No
TCP10L2	t-complex 10 like 2	ENSG00000166984	6q27	Yes	No
TCTE1	t-complex-associated-testis-expressed 1	ENSG00000146221	6p21.1	Yes	No
TCTN2	tectonic family member 2	ENSG00000168778	12q24.31	Yes	No
TECPR2	tectonin beta-propeller repeat containing 2	ENSG00000196663	14q32.31	No	Yes
TECTA	tectorin alpha	ENSG00000109927	11q23.3	Yes	Yes
TEPSIN	TEPSIN adaptor related protein complex 4 accessory protein	ENSG00000167302	17q25.3	No	Yes
TERB1	telomere repeat binding bouquet formation protein 1	ENSG00000249961	16q22.1	Yes	No
TERT	telomerase reverse transcriptase	ENSG00000164362	5p15.33	No	Yes
TESPA1	thymocyte expressed, positive selection associated 1	ENSG00000135426	12q13.2	Yes	No
TEX12	testis expressed 12	ENSG00000150783	11q23.1	Yes	No
TEX9	testis expressed 9	ENSG00000151575	15q21.3	Yes	No
TFAM	transcription factor A, mitochondrial	ENSG00000108064	10q21.1	Yes	No
TFG	trafficking from ER to golgi regulator	ENSG00000114354	3q12.2	Yes	Yes
TGIF2LY	TGFB induced factor homeobox 2 like Y-linked	ENSG00000176679	Yp11.2	Yes	No
TIGD5	tigger transposable element derived 5	ENSG00000179886, ENSG00000278016	8q24.3	No	Yes
TIGD7	tigger transposable element derived 7	ENSG00000140993	16p13.3	Yes	No
[truncated: 260 more rows]
