# Supplementary material for: A Study of the Genomic Variations Associated with Autistic Spectrum Disorders in a Russian Cohort of Patients Using Whole-Exome Sequencing
Source: Genes (Basel). 2022 May 20;13(5):920. doi: 10.3390/genes13050920 (PMC9141003; doi:10.3390/genes13050920)
Supplement: Supplementary file 1 [file genes-13-00920-s001.zip › Table S8.xlsx]

## Sheet: S8 Table
Table S8.	Top 30 list of GO terms ranked by Enrichment P-value, which were significantly overrepresented in the sets of genes harboring CNVs in ASD and nonASD, respectively.
	The overrepresentation tests were performed using the ShinyGO tools (Ge, Jung, and Yao, 2020; Bioinformatics, 36(8):2628–2629)
Enrichment FDR	Genes in the set	Total genes	GO:Biological Process	Genes
Overrepresented in the ASD gene-set (N = 1389)
3.29181e-09	25	76	Chromosome organization involved in meiotic cell cycle	DMC1 RAD50 HORMAD1 FANCD2 TEX12 BUB1B SYCP1 RAD21L1 TERB1 MRE11 SPO11 MSH4 MLH1 RAD51C SMC4 UBE2B MLH3 BRIP1 SPATA22 ATM MEIOB HORMAD2 MEIOC C1ORF146 SYCP2
6.12679e-09	28	100	Meiotic chromosome segregation	MSH4 TOP2A HORMAD1 FANCD2 TEX12 BUB1B MEIOB SHOC1 ERCC4 SYCP1 RAD21L1 TERB1 MRE11 SPO11 MLH1 DMC1 RAD51C SMC4 UBE2B MLH3 BRIP1 SPATA22 ATM HORMAD2 MEIOC FANCM C1ORF146 SYCP2
5.05752e-07	19	58	Homologous chromosome pairing at meiosis	HORMAD1 FANCD2 TEX12 SYCP1 RAD21L1 TERB1 MRE11 SPO11 MSH4 MLH1 DMC1 UBE2B MLH3 BRIP1 SPATA22 MEIOB MEIOC C1ORF146 SYCP2
5.05752e-07	20	64	Reciprocal meiotic recombination	SPO11 MSH4 DMC1 RAD51C MSH3 TOP2A BRIP1 FANCD2 MEIOB SHOC1 ERCC4 SYCP1 MLH1 UBE2B FANCM C1ORF146 MLH3 MRE11 RAD50 ATM
5.05752e-07	20	65	Homologous recombination	SPO11 MSH4 DMC1 RAD51C MSH3 TOP2A BRIP1 FANCD2 MEIOB SHOC1 ERCC4 SYCP1 MLH1 UBE2B FANCM C1ORF146 MLH3 MRE11 RAD50 ATM
6.88416e-07	36	194	Meiotic nuclear division	SPO11 MSH4 DMC1 RAD51C MSH3 TOP2A BRIP1 HORMAD1 FANCD2 TEX12 BUB1B SHCBP1L MEIOB SHOC1 ERCC4 MEIOC SYCP2 SYCP1 RAD21L1 TERB1 MRE11 MLH1 SMC4 UBE2B MLH3 BRCA2 SPATA22 ATM ASZ1 WASHC5 HORMAD2 ASPM FANCM C1ORF146 SYCP3 RAD50
9.12529e-07	29	136	Meiosis I	SPO11 MSH4 DMC1 RAD51C MSH3 TOP2A BRIP1 HORMAD1 FANCD2 TEX12 MEIOB SHOC1 ERCC4 MEIOC SYCP1 RAD21L1 TERB1 MRE11 MLH1 UBE2B MLH3 BRCA2 SPATA22 ATM FANCM C1ORF146 SYCP3 SYCP2 RAD50
1.02689e-06	20	69	Homologous chromosome segregation	HORMAD1 FANCD2 TEX12 SYCP1 RAD21L1 TERB1 MRE11 SPO11 MSH4 MLH1 DMC1 UBE2B MLH3 BRIP1 SPATA22 ATM MEIOB MEIOC C1ORF146 SYCP2
1.32591e-06	51	350	Chromosome segregation	CDC27 MSH4 SMC4 TOP2A CDK5RAP2 DSCC1 HORMAD1 FANCD2 TEX12 BUB1B MEIOB NIPBL SHOC1 SKA3 ESCO2 ERCC4 SKA2 SYCP1 RAD21L1 TERB1 CDC6 CENPE KNTC1 MRE11 SPO11 MLH1 SMC1B DMC1 RAD51C NR3C1 UBE2B MLH3 BRIP1 SPATA22 ATM CENPN HORMAD2 MEIOC SMC5 TTN BRCA1 CHMP2B SMC3 ECT2 SLF2 RB1 SMC6 SMARCAD1 FANCM C1ORF146 SYCP2
1.54392e-06	29	141	Meiosis I cell cycle process	MRE11 SPO11 MSH4 DMC1 RAD51C MSH3 TOP2A BRIP1 HORMAD1 FANCD2 TEX12 MEIOB SHOC1 ERCC4 MEIOC SYCP1 RAD21L1 TERB1 MLH1 UBE2B MLH3 BRCA2 SPATA22 ATM FANCM C1ORF146 SYCP3 SYCP2 RAD50
1.93744e-06	66	522	Organelle fission	CDC27 SPO11 MSH4 DNM1L TPX2 DMC1 RAD51C MSH3 SMC4 TOP2A BRIP1 CDK5RAP2 DSCC1 HORMAD1 FANCD2 TEX12 BUB1B SHCBP1L MEIOB NIPBL WASHC5 SHOC1 ERCC4 MEIOC SYCP2 SYCP1 OPA1 RAD21L1 TERB1 MAPT CENPE CHEK1 KNTC1 MRE11 KIF1B MLH1 SMC1B UBE2B MLH3 AP3B1 BRCA2 SPATA22 ATM ASZ1 C11ORF65 TMEM135 MTBP HORMAD2 TTN ACOX1 SPAST ASPM VPS35 CHMP2B CDC6 SMC3 SLF2 RB1 CHEK2 FANCM SMC5 C1ORF146 SYCP3 VRK1 RAD50 LRRK2
1.93744e-06	44	284	Nuclear chromosome segregation	CDC27 MSH4 SMC4 TOP2A CDK5RAP2 DSCC1 HORMAD1 FANCD2 TEX12 BUB1B MEIOB NIPBL SHOC1 ESCO2 ERCC4 SYCP1 RAD21L1 TERB1 CENPE KNTC1 MRE11 SPO11 MLH1 SMC1B DMC1 RAD51C UBE2B MLH3 BRIP1 SPATA22 ATM HORMAD2 MEIOC SMC5 TTN CHMP2B CDC6 SMC3 ECT2 SLF2 RB1 FANCM C1ORF146 SYCP2
2.21637e-06	11	21	Positive regulation of peptidyl-serine phosphorylation of STAT protein	IFNA21 IFNA5 IFNA16 IFNB1 IFNW1 IFNA10 IFNA7 IFNA14 IFNA17 IFNA4 ERCC6
2.69075e-06	36	210	Meiotic cell cycle process	MRE11 SPO11 MSH4 DMC1 RAD51C MSH3 RAD50 TOP2A BRIP1 HORMAD1 FANCD2 TEX12 BUB1B SHCBP1L MEIOB SHOC1 ERCC4 MEIOC SYCP2 SYCP1 RAD21L1 TERB1 MLH1 SMC4 UBE2B MLH3 BRCA2 SPATA22 ATM ASZ1 WASHC5 HORMAD2 ASPM FANCM C1ORF146 SYCP3
2.72749e-06	56	417	Cilium assembly	OFD1 IFT80 IFT74 RPGRIP1L JHY ARL6 WDR35 BBS9 DNAH8 BBS2 TTBK2 BBS7 TBC1D32 DNAAF1 BBS5 IFT122 TMEM67 TTC8 TCTN2 ARL13B IQCB1 DYNC2H1 CFAP43 ODF2L CEP290 RPAP3 SYNE2 CCP110 UBE2B ATXN10 MNS1 C2CD3 NME8 MAP11 RPGR CYLD NPHP3 WDR11 BBS4 PAFAH1B1 HSP90AA1 TRIP11 CEP152 ALMS1 CNTRL TTC21B AKAP9 CDK5RAP2 HAUS2 NPHP1 CEP57 CKAP5 CEP63 SFI1 DMD HAUS3
9.21565e-06	41	271	Meiotic cell cycle	MRE11 SPO11 MSH4 DMC1 RAD51C MSH3 RAD50 TOP2A BRIP1 SYCP3 SPATA22 HORMAD1 FANCD2 TEX12 BUB1B SHCBP1L MEIOB SHOC1 ERCC4 MEIOC SYCP2 SYCP1 RAD21L1 TERB1 SMC3 MLH1 SMC1B RBBP8 NBN SMC4 UBE2B MLH3 MNS1 BRCA2 ATM ASZ1 WASHC5 HORMAD2 ASPM FANCM C1ORF146
9.59948e-06	45	314	DNA recombination	BRCA1 MRE11 SPO11 MSH4 NUCKS1 PALB2 MSH2 DMC1 RBBP8 NBN RAD51C MSH3 RAD50 SHLD2 TOP2A BRIP1 BRCA2 FANCD2 SFR1 MEIOB NIPBL SHOC1 WRN ERCC4 FANCB FANCM BLM SYCP1 RAD21L1 SAMHD1 CHEK1 MLH1 PTPRC SETX UBE2B BCL11B ATM SMC6 SMC5 SMARCAD1 POLN ERCC6 RNF168 C1ORF146 MLH3
9.59948e-06	11	24	Regulation of peptidyl-serine phosphorylation of STAT protein	IFNA21 IFNA5 IFNA16 IFNB1 IFNW1 IFNA10 IFNA7 IFNA14 IFNA17 IFNA4 ERCC6
1.31365e-05	56	439	Cilium organization	OFD1 IFT80 IFT74 RPGRIP1L CCP110 JHY ARL6 WDR35 BBS9 TTC21B DNAH8 BBS2 TTBK2 MNS1 BBS7 TBC1D32 DNAAF1 BBS5 IFT122 TMEM67 TTC8 TCTN2 ARL13B IQCB1 DYNC2H1 CFAP43 ODF2L CEP290 RPAP3 SYNE2 UBE2B ATXN10 C2CD3 NME8 MAP11 RPGR CYLD NPHP3 WDR11 BBS4 PAFAH1B1 HSP90AA1 TRIP11 CEP152 ALMS1 CNTRL AKAP9 CDK5RAP2 HAUS2 NPHP1 CEP57 CKAP5 CEP63 SFI1 DMD HAUS3
1.3487e-05	23	107	Ciliary basal body-plasma membrane docking	PAFAH1B1 OFD1 HSP90AA1 RPGRIP1L CCP110 CEP152 ALMS1 CNTRL AKAP9 TTBK2 CDK5RAP2 HAUS2 NPHP1 TMEM67 CEP57 C2CD3 TCTN2 IQCB1 CKAP5 CEP63 SFI1 CEP290 HAUS3
3.06719e-05	71	629	DNA repair	BRCA1 MRE11 ERCC8 SPO11 MSH4 NUCKS1 MLH1 PALB2 MSH2 DMC1 RBBP8 NBN RAD51C NEIL3 MSH3 FANCL UBE2B MLH3 SHLD2 PMS2 BRIP1 XPA BRCA2 FANCD2 GTF2H2 SFR1 NIPBL WRN POLH ERCC4 FANCB FANCM BLM SYCP1 ERCC6 RAD21L1 SPRTN SAMHD1 SETX RAD50 SLF2 POLN KAT7 FTO CHEK1 CUL4B USP1 RNF168 GTF2I RRM2B ZMPSTE24 RBX1 SMC3 MBD4 ASCC1 FANCI SPATA22 ATM TEX12 SMG1 TAOK1 MEIOB SMC6 SMARCAD1 ESCO2 ATR MEIOC CHEK2 USP7 SMC…
4.34646e-05	57	469	Nuclear division	CDC27 SPO11 MSH4 TPX2 DMC1 RAD51C MSH3 SMC4 TOP2A BRIP1 CDK5RAP2 DSCC1 HORMAD1 FANCD2 TEX12 BUB1B SHCBP1L MEIOB NIPBL SHOC1 ERCC4 MEIOC SYCP2 SYCP1 RAD21L1 TERB1 CENPE CHEK1 KNTC1 MRE11 KIF1B MLH1 SMC1B UBE2B MLH3 BRCA2 SPATA22 ATM ASZ1 WASHC5 MTBP HORMAD2 TTN SPAST ASPM CHMP2B CDC6 SMC3 SLF2 RB1 CHEK2 FANCM SMC5 C1ORF146 SYCP3 VRK1 RAD50
4.34646e-05	26	141	Double-strand break repair via homologous recombination	BRCA1 MRE11 NUCKS1 PALB2 DMC1 RBBP8 NBN RAD51C SHLD2 BRCA2 SFR1 NIPBL WRN ERCC4 FANCB FANCM BLM RAD21L1 SAMHD1 CHEK1 ATM MEIOB SMC5 POLN ERCC6 RAD50
4.96837e-05	11	28	Serine phosphorylation of STAT protein	IFNA21 IFNA5 IFNA16 IFNB1 IFNW1 IFNA10 IFNA7 IFNA14 IFNA17 IFNA4 ERCC6
5.3182e-05	26	143	Recombinational repair	BRCA1 MRE11 NUCKS1 PALB2 DMC1 RBBP8 NBN RAD51C SHLD2 BRCA2 SFR1 NIPBL WRN ERCC4 FANCB FANCM BLM RAD21L1 SAMHD1 CHEK1 ATM MEIOB SMC5 POLN ERCC6 RAD50
8.02009e-05	69	624	Plasma membrane bounded cell projection assembly	OFD1 IFT80 IFT74 RPGRIP1L JHY ARL6 WDR35 BBS9 DNAH8 BBS2 TTBK2 BBS7 TBC1D32 DNAAF1 BBS5 IFT122 TMEM67 TTC8 TCTN2 ARL13B IQCB1 DYNC2H1 CFAP43 ODF2L CDH13 SRGAP2C CEP290 RPAP3 SYNE2 HDAC4 CCP110 UBE2B NUP85 ATXN10 MNS1 C2CD3 NME8 RDX MYO10 MAP11 PTPRO RPGR ANO6 WASHC1 USP17L2 CYLD NPHP3 WDR11 BBS4 PLEKHM1 PAFAH1B1 OPHN1 HSP90AA1 TRIP11 CEP152 ALMS1 CNTRL TTC21B AKAP9 CDK5RAP2 HAUS2 NPHP1 CEP57 CKAP…
8.13614e-05	10	24	Mitotic recombination	DMC1 MSH3 RAD50 MLH1 RAD51C BRCA2 SMC6 ERCC4 SMC5 MRE11
0.000123807	10	25	DNA double-strand break processing	SPO11 RBBP8 BLM BRIP1 SMARCAD1 BRCA1 MRE11 NBN RAD50 ATM
0.000128632	12	37	Natural killer cell activation involved in immune response	IFNA21 IFNA5 IFNA16 IFNB1 IFNW1 IFNA10 IFNA7 IFNA14 IFNA17 IFNA4 KLRC2 AP1G1
0.000128632	39	283	Double-strand break repair	BRCA1 MRE11 SPO11 NUCKS1 PALB2 DMC1 RBBP8 NBN RAD51C SHLD2 BRIP1 BRCA2 FANCD2 SFR1 NIPBL WRN ERCC4 FANCB FANCM BLM RAD21L1 ERCC8 SAMHD1 SETX SLF2 CHEK1 RNF168 ERCC6 MLH1 MSH2 ATM MEIOB ESCO2 MEIOC SMC5 RAD50 POLN SMARCAD1 CHEK2
Overrepresented in the nonASD gene-set (N = 822)
1.33588e-14	15	21	Positive regulation of peptidyl-serine phosphorylation of STAT protein	IFNA6 IFNA8 IFNA21 IFNA5 IFNA16 IFNB1 IFNW1 IFNA10 IFNA2 IFNA1 IFNA7 IFNA14 IFNA13 IFNA17 IFNA4
1.46296e-13	15	24	Regulation of peptidyl-serine phosphorylation of STAT protein	IFNA6 IFNA8 IFNA21 IFNA5 IFNA16 IFNB1 IFNW1 IFNA10 IFNA2 IFNA1 IFNA7 IFNA14 IFNA13 IFNA17 IFNA4
2.45939e-12	15	28	Serine phosphorylation of STAT protein	IFNA6 IFNA8 IFNA21 IFNA5 IFNA16 IFNB1 IFNW1 IFNA10 IFNA2 IFNA1 IFNA7 IFNA14 IFNA13 IFNA17 IFNA4
3.46579e-10	15	37	Natural killer cell activation involved in immune response	IFNA6 IFNA8 IFNA21 IFNA5 IFNA16 IFNB1 IFNW1 IFNA10 IFNA2 IFNA1 IFNA7 IFNA14 IFNA13 IFNA17 IFNA4
1.70957e-08	16	55	Response to exogenous dsRNA	IFNA6 IFNA8 IFNA21 IFNA5 IFNA16 IFNB1 IFNW1 IFNA10 IFNA2 IFNA1 IFNA7 IFNA14 IFNA13 IFNA17 IFNA4 CARD9
8.02479e-08	16	61	Response to dsRNA	IFNA6 IFNA8 IFNA21 IFNA5 IFNA16 IFNB1 IFNW1 IFNA10 IFNA2 IFNA1 IFNA7 IFNA14 IFNA13 IFNA17 IFNA4 CARD9
6.0119e-07	23	148	Regulation of receptor signaling pathway via JAK-STAT	IFNA6 IFNA8 GH2 CSH1 IFNA21 IFNA5 IFNA16 IFNB1 IFNW1 IFNA10 IFNA2 IFNA1 IFNA7 IFNA14 IFNA13 IFNA17 IFNA4 HGS NOTCH1 MST1 FGFR3 TNFRSF18 PTK6
8.98214e-07	23	152	Regulation of receptor signaling pathway via STAT	IFNA6 IFNA8 GH2 CSH1 IFNA21 IFNA5 IFNA16 IFNB1 IFNW1 IFNA10 IFNA2 IFNA1 IFNA7 IFNA14 IFNA13 IFNA17 IFNA4 HGS NOTCH1 MST1 FGFR3 TNFRSF18 PTK6
1.48798e-06	24	170	Receptor signaling pathway via JAK-STAT	IFNA6 IFNA8 GH2 CSH1 IFNA21 IFNA5 IFNA16 IFNB1 IFNW1 IFNA10 IFNA2 IFNA1 IFNA7 IFNA14 IFNA13 IFNA17 IFNA4 PTK6 HGS PKD1 NOTCH1 MST1 FGFR3 TNFRSF18
2.40672e-06	24	175	Receptor signaling pathway via STAT	IFNA6 IFNA8 GH2 CSH1 IFNA21 IFNA5 IFNA16 IFNB1 IFNW1 IFNA10 IFNA2 IFNA1 IFNA7 IFNA14 IFNA13 IFNA17 IFNA4 PTK6 HGS PKD1 NOTCH1 MST1 FGFR3 TNFRSF18
3.1665e-06	20	126	T cell activation involved in immune response	IFNA6 IFNA8 IFNA21 IFNA5 IFNA16 IFNB1 IFNW1 IFNA10 IFNA2 IFNA1 IFNA7 IFNA14 IFNA13 IFNA17 IFNA4 CEACAM1 HLA-DRB1 HLA-DRA SLC11A1 GATA3
3.9903e-06	19	116	Positive regulation of peptidyl-serine phosphorylation	IFNA6 IFNA8 IFNA21 IFNA5 IFNA16 IFNB1 IFNW1 IFNA10 IFNA2 IFNA1 IFNA7 IFNA14 IFNA13 IFNA17 IFNA4 AVP WNT3A GAS6 CALCR
1.20446e-05	17	100	B cell proliferation	IFNA6 IFNA8 IFNA21 IFNA5 IFNA16 IFNB1 IFNW1 IFNA10 IFNA2 IFNA1 IFNA7 IFNA14 IFNA13 IFNA17 IFNA4 WNT3A TNFRSF4
1.50916e-05	189	3864	Animal organ development	RHOA SYNGR3 SEC16A CKB SOX8 FLT4 LAMC3 SBNO2 DVL1 GATA3 IFNA6 IFNA8 OBSL1 GFER HOXD3 HOXD9 MYOD1 MNX1 LAMA5 EMX1 GH2 CSH1 IFNA21 FOXF2 PDX1 IFNA5 IFNA16 AIRE CRYBA2 CDX2 VCX3A HOXD4 IFNB1 IFNW1 RFLNA AATK VCX IFNA10 KLHL17 AGRN IFNA2 IFNA1 IFNA7 IFNA14 IFNA13 IFNA17 IFNA4 LILRB2 FOXC1 NKX2-1 WNT3A WNT10B GAS6 JAG2 HLA-DRB1 HLA-DRA POU5F1 LILRB3 PLXND1 CALCR PKD1 CNTN1 NCAPH2 F7 CTDP1 GPC1 HDAC4 A…
0.000187904	34	395	Lymphocyte differentiation	IFNA6 IFNA8 IFNA21 IFNA5 IFNA16 AIRE IFNB1 IFNW1 IFNA10 IFNA2 IFNA1 IFNA7 IFNA14 IFNA13 IFNA17 IFNA4 GATA3 GAS6 JAG2 HLA-DRB1 HLA-DRA NCAPH2 RHOA YY1 STK11 WNT1 DTX1 ADAM8 FUT7 NRARP LILRB2 LFNG HDAC4 TNFRSF18
0.000187904	17	122	Type I interferon signaling pathway	IFNB1 CACTIN IFNA6 IFNA8 IFNA21 IFNA5 IFNA16 IFNA10 IFNA2 IFNA1 HLA-C HLA-A IFNA7 IFNA14 IFNA13 IFNA17 IFNA4
0.000190643	19	151	Regulation of peptidyl-serine phosphorylation	IFNA6 IFNA8 IFNA21 IFNA5 IFNA16 IFNB1 IFNW1 IFNA10 IFNA2 IFNA1 IFNA7 IFNA14 IFNA13 IFNA17 IFNA4 AVP WNT3A GAS6 CALCR
0.000190643	17	123	Cellular response to type I interferon	IFNB1 CACTIN IFNA6 IFNA8 IFNA21 IFNA5 IFNA16 IFNA10 IFNA2 IFNA1 HLA-C HLA-A IFNA7 IFNA14 IFNA13 IFNA17 IFNA4
0.00031337	17	128	Response to type I interferon	IFNB1 CACTIN IFNA6 IFNA8 IFNA21 IFNA5 IFNA16 IFNA10 IFNA2 IFNA1 HLA-C HLA-A IFNA7 IFNA14 IFNA13 IFNA17 IFNA4
0.000327676	18	143	B cell differentiation	IFNA6 IFNA8 IFNA21 IFNA5 IFNA16 IFNB1 IFNW1 IFNA10 IFNA2 IFNA1 IFNA7 IFNA14 IFNA13 IFNA17 IFNA4 YY1 LFNG HDAC4
0.000483747	16	119	Natural killer cell activation	IFNA6 IFNA8 IFNA21 IFNA5 IFNA16 IFNB1 IFNW1 IFNA10 IFNA2 IFNA1 IFNA7 IFNA14 IFNA13 IFNA17 IFNA4 GAS6
0.000513568	22	210	Lymphocyte activation involved in immune response	IFNA6 IFNA8 IFNA21 IFNA5 IFNA16 IFNB1 IFNW1 IFNA10 IFNA2 IFNA1 IFNA7 IFNA14 IFNA13 IFNA17 IFNA4 CEACAM1 HLA-DRB1 HLA-DRA SLC11A1 GATA3 NSD2 LFNG
0.000626501	31	369	Blood coagulation	F7 HGFAC F12 PRSS56 ENPP4 TBXA2R ENTPD2 MMRN1 WNT3A GAS6 CEACAM1 RCOR1 GATA3 IFNA6 IFNA8 IFNA21 DGKQ IFNA5 IFNA16 IFNB1 IFNA10 P2RX2 IFNA2 IFNA1 MAFK CD177 IFNA7 IFNA14 IFNA13 IFNA17 IFNA4
0.000736482	31	373	Hemostasis	F7 HGFAC F12 PRSS56 ENPP4 TBXA2R ENTPD2 MMRN1 WNT3A GAS6 CEACAM1 RCOR1 GATA3 IFNA6 IFNA8 IFNA21 DGKQ IFNA5 IFNA16 IFNB1 IFNA10 P2RX2 IFNA2 IFNA1 MAFK CD177 IFNA7 IFNA14 IFNA13 IFNA17 IFNA4
0.000736482	39	527	Epidermis development	LAMA5 PTPRQ SMAD4 NOTCH1 FOXQ1 AGPAT2 WNT10B TPRN JAG2 SOX18 FOXC1 WNT10A STS FURIN KRTAP9-7 KRTAP13-2 KRTAP19-1 PKP3 KRTAP19-6 KRTAP19-2 KRTAP19-4 KRTAP15-1 KRTAP13-4 KRTAP19-5 KRTAP23-1 KRTAP24-1 HLA-DRB1 KRTAP26-1 KRTAP13-1 LIPN KRTAP4-8 KRTAP27-1 KRTAP4-11 KRTAP4-9 KRTAP25-1 KRTAP13-3 KRTAP4-7 KRTAP19-3 KRTAP19-7
0.000736482	31	374	Coagulation	F7 HGFAC F12 PRSS56 ENPP4 TBXA2R ENTPD2 MMRN1 WNT3A GAS6 CEACAM1 RCOR1 GATA3 IFNA6 IFNA8 IFNA21 DGKQ IFNA5 IFNA16 IFNB1 IFNA10 P2RX2 IFNA2 IFNA1 MAFK CD177 IFNA7 IFNA14 IFNA13 IFNA17 IFNA4
0.0007603	36	470	Skin development	TCF15 LAMA5 SMAD4 NOTCH1 FOXQ1 WNT10B SOX18 PKD1 FOXC1 ITGB4 WNT10A FURIN KRTAP9-7 KRTAP13-2 KRTAP19-1 PKP3 KRTAP19-6 KRTAP19-2 KRTAP19-4 KRTAP15-1 KRTAP13-4 KRTAP19-5 KRTAP23-1 KRTAP24-1 KRTAP26-1 KRTAP13-1 LIPN KRTAP4-8 KRTAP27-1 KRTAP4-11 KRTAP4-9 KRTAP25-1 KRTAP13-3 KRTAP4-7 KRTAP19-3 KRTAP19-7
0.000769995	25	269	Keratinization	FURIN KRTAP9-7 KRTAP13-2 KRTAP19-1 PKP3 KRTAP19-6 KRTAP19-2 KRTAP19-4 KRTAP15-1 KRTAP13-4 KRTAP19-5 KRTAP23-1 KRTAP24-1 KRTAP26-1 KRTAP13-1 LIPN KRTAP4-8 KRTAP27-1 KRTAP4-11 KRTAP4-9 KRTAP25-1 KRTAP13-3 KRTAP4-7 KRTAP19-3 KRTAP19-7
0.000834912	67	1127	Animal organ morphogenesis	LAMC3 DVL1 OBSL1 HOXD3 HOXD9 LAMA5 FOXF2 CDX2 HOXD4 RFLNA AGRN WNT3A PLXND1 SOX8 PKD1 FOXC1 RHOA YY1 HOXA13 GATA3 NSD2 IRX4 PLXNA1 WNT6 RPE65 WNT1 TCF15 HOXD10 HOXD13 EMX1 WNT10A NKX2-1 PTPRQ SMAD4 CRB2 NOTCH1 FOXH1 UNCX LTBP3 GBX2 WNT10B IRX1 IRX2 MST1 HOXD8 TPRN JAG2 SAPCD2 HMX3 HMX2 COL27A1 PAX9 ITGB4 TTN INPPL1 POU5F1 FGFR3 CEACAM1 HOXD11 WNT9A SHROOM2 SOX18 LFNG EVL LHX3 PDX1 COL18A1
0.000842801	10	51	Cell differentiation in spinal cord	MNX1 LHX3 WNT1 HOXD10 SCYL1 NOTCH1 WNT3A ISL2 PHOX2A GSX1
